# Supplementary material for: Pyrolysis transports, and transforms, PFAS from biosolids to py-liquid
Source: Royal Society of Chemistry journal article supplement (doi:10.1039/d2ew00677d), 2022-12-16
Supplement: d2ew00677d2.xlsx [file d2ew00677d2.xlsx]

## Sheet: TOP ASSAY 221122215
Sample_ID	Analytical_Method	Parameter	Laboratory_Qualifiers	Result	Unit	Detection_Limit	Dilution_Factor	CAS
Biosolids-1	PFAS Top Assay QSM B15 (Post)	11Cl-PF3OUdS	U	0.021	ug/Kg	0.021	1	763051-92-9		Key for Laboratory_Qualifiers
Biosolids-1	PFAS Top Assay QSM B15 (Post)	4:2 Fluorotelomer sulfonic acid (4:2 FTS)	U	0.053	ug/Kg	0.053	1	757124-72-4		"U" denotes below detection limit, result reported as detection limit
Biosolids-1	PFAS Top Assay QSM B15 (Post)	6:2 Fluorotelomer sulfonic acid (6:2FTS)	J	0.119	ug/Kg	0.063	1	27619-97-2		"J" denotes above detection limit, but below quantification limit, result reported as measured
Biosolids-1	PFAS Top Assay QSM B15 (Post)	8:2 Fluorotelomer sulfonic acid (8:2 FTS)	U	0.032	ug/Kg	0.032	1	39108-34-4
Biosolids-1	PFAS Top Assay QSM B15 (Post)	9Cl-PF3ONS	U	0.032	ug/Kg	0.032	1	756426-58-1
Biosolids-1	PFAS Top Assay QSM B15 (Post)	ADONA	U	0.011	ug/Kg	0.011	1	919005-14-4
Biosolids-1	PFAS Top Assay QSM B15 (Post)	Perfluoro-2-proxypropanoic acid (HFPO-DA)	U	0.148	ug/Kg	0.148	1	13252-13-6
Biosolids-1	PFAS Top Assay QSM B15 (Post)	NEtFOSAA	U	0.032	ug/Kg	0.032	1	2991-50-6
Biosolids-1	PFAS Top Assay QSM B15 (Post)	NMeFOSAA	U	0.021	ug/Kg	0.021	1	2355-31-9
Biosolids-1	PFAS Top Assay QSM B15 (Post)	Perfluorobutanoic acid (PFBA)		5.01	ug/Kg	0.042	1	375-22-4
Biosolids-1	PFAS Top Assay QSM B15 (Post)	Perfluorobutanesulfonic acid (PFBS)	J	0.214	ug/Kg	0.021	1	375-73-5
Biosolids-1	PFAS Top Assay QSM B15 (Post)	Perfluorodecanoic acid (PFDA)	J	0.185	ug/Kg	0.042	1	335-76-2
Biosolids-1	PFAS Top Assay QSM B15 (Post)	Perfluorodecane sulfonic acid (PFDS)	J	0.074	ug/Kg	0.032	1	335-77-3
Biosolids-1	PFAS Top Assay QSM B15 (Post)	Perfluorododecanoic acid (PFDoA)	J	0.108	ug/Kg	0.021	1	307-55-1
Biosolids-1	PFAS Top Assay QSM B15 (Post)	Perfluoroheptanoic acid (PFHpA)	J	0.66	ug/Kg	0.021	1	375-85-9
Biosolids-1	PFAS Top Assay QSM B15 (Post)	Perfluoroheptanesulfonic acid (PFHpS)	U	0.021	ug/Kg	0.021	1	375-92-8
Biosolids-1	PFAS Top Assay QSM B15 (Post)	Perfluorohexanoic acid (PFHxA)		2.15	ug/Kg	0.021	1	307-24-4
Biosolids-1	PFAS Top Assay QSM B15 (Post)	Perfluorohexanesulfonic acid (PFHxS)	J	0.052	ug/Kg	0.032	1	355-46-4
Biosolids-1	PFAS Top Assay QSM B15 (Post)	Perfluorononanoic acid (PFNA)	J	0.243	ug/Kg	0.021	1	375-95-1
Biosolids-1	PFAS Top Assay QSM B15 (Post)	Perfluorononanesulfonic acid (PFNS)	U	0.032	ug/Kg	0.032	1	68259-12-1
Biosolids-1	PFAS Top Assay QSM B15 (Post)	Perfluorooctanoic acid (PFOA)	J	0.635	ug/Kg	0.085	1	335-67-1
Biosolids-1	PFAS Top Assay QSM B15 (Post)	Perfluorooctanesulfonic acid (PFOS)		1.3	ug/Kg	0.053	1	1763-23-1
Biosolids-1	PFAS Top Assay QSM B15 (Post)	Perfluorooctane Sulfonamide (FOSA)	J	0.025	ug/Kg	0.021	1	754-91-6
Biosolids-1	PFAS Top Assay QSM B15 (Post)	Perfluoropentanoic acid (PFPeA)		5.43	ug/Kg	0.021	1	2706-90-3
Biosolids-1	PFAS Top Assay QSM B15 (Post)	Perfluoropentanesulfonic acid (PFPeS)	U	0.021	ug/Kg	0.021	1	2706-91-4
Biosolids-1	PFAS Top Assay QSM B15 (Post)	Perfluorotetradecanoic acid (PFTA)	J	0.046	ug/Kg	0.021	1	376-06-7
Biosolids-1	PFAS Top Assay QSM B15 (Post)	Perfluorotridecanoic acid (PFTrDA)	U	0.032	ug/Kg	0.032	1	72629-94-8
Biosolids-1	PFAS Top Assay QSM B15 (Post)	Perfluoroundecanoic acid (PFUnA)	J	0.099	ug/Kg	0.021	1	2058-94-8
Biosolids-1	PFAS Top Assay QSM B15 (Pre)	11Cl-PF3OUdS	U	0.021	ug/Kg	0.021	1	763051-92-9
Biosolids-1	PFAS Top Assay QSM B15 (Pre)	4:2 Fluorotelomer sulfonic acid (4:2 FTS)	U	0.052	ug/Kg	0.052	1	757124-72-4
Biosolids-1	PFAS Top Assay QSM B15 (Pre)	6:2 Fluorotelomer sulfonic acid (6:2FTS)		1.06	ug/Kg	0.063	1	27619-97-2
Biosolids-1	PFAS Top Assay QSM B15 (Pre)	8:2 Fluorotelomer sulfonic acid (8:2 FTS)	J	0.067	ug/Kg	0.031	1	39108-34-4
Biosolids-1	PFAS Top Assay QSM B15 (Pre)	9Cl-PF3ONS	U	0.031	ug/Kg	0.031	1	756426-58-1
Biosolids-1	PFAS Top Assay QSM B15 (Pre)	ADONA	U	0.01	ug/Kg	0.01	1	919005-14-4
Biosolids-1	PFAS Top Assay QSM B15 (Pre)	Perfluoro-2-proxypropanoic acid (HFPO-DA)	U	0.146	ug/Kg	0.146	1	13252-13-6
Biosolids-1	PFAS Top Assay QSM B15 (Pre)	NEtFOSAA	J	0.262	ug/Kg	0.031	1	2991-50-6
Biosolids-1	PFAS Top Assay QSM B15 (Pre)	NMeFOSAA	J	0.382	ug/Kg	0.021	1	2355-31-9
Biosolids-1	PFAS Top Assay QSM B15 (Pre)	Perfluorobutanoic acid (PFBA)	J	0.142	ug/Kg	0.042	1	375-22-4
Biosolids-1	PFAS Top Assay QSM B15 (Pre)	Perfluorobutanesulfonic acid (PFBS)	U	0.021	ug/Kg	0.021	1	375-73-5
Biosolids-1	PFAS Top Assay QSM B15 (Pre)	Perfluorodecanoic acid (PFDA)	J	0.168	ug/Kg	0.042	1	335-76-2
Biosolids-1	PFAS Top Assay QSM B15 (Pre)	Perfluorodecane sulfonic acid (PFDS)	J	0.092	ug/Kg	0.031	1	335-77-3
Biosolids-1	PFAS Top Assay QSM B15 (Pre)	Perfluorododecanoic acid (PFDoA)	J	0.098	ug/Kg	0.021	1	307-55-1
Biosolids-1	PFAS Top Assay QSM B15 (Pre)	Perfluoroheptanoic acid (PFHpA)	J	0.039	ug/Kg	0.021	1	375-85-9
Biosolids-1	PFAS Top Assay QSM B15 (Pre)	Perfluoroheptanesulfonic acid (PFHpS)	J	0.095	ug/Kg	0.021	1	375-92-8
Biosolids-1	PFAS Top Assay QSM B15 (Pre)	Perfluorohexanoic acid (PFHxA)		1.02	ug/Kg	0.021	1	307-24-4
Biosolids-1	PFAS Top Assay QSM B15 (Pre)	Perfluorohexanesulfonic acid (PFHxS)	J	0.307	ug/Kg	0.031	1	355-46-4
Biosolids-1	PFAS Top Assay QSM B15 (Pre)	Perfluorononanoic acid (PFNA)	J	0.082	ug/Kg	0.021	1	375-95-1
Biosolids-1	PFAS Top Assay QSM B15 (Pre)	Perfluorononanesulfonic acid (PFNS)	U	0.031	ug/Kg	0.031	1	68259-12-1
Biosolids-1	PFAS Top Assay QSM B15 (Pre)	Perfluorooctanoic acid (PFOA)	J	0.129	ug/Kg	0.084	1	335-67-1
Biosolids-1	PFAS Top Assay QSM B15 (Pre)	Perfluorooctanesulfonic acid (PFOS)		1.09	ug/Kg	0.052	1	1763-23-1
Biosolids-1	PFAS Top Assay QSM B15 (Pre)	Perfluorooctane Sulfonamide (FOSA)	J	0.059	ug/Kg	0.021	1	754-91-6
Biosolids-1	PFAS Top Assay QSM B15 (Pre)	Perfluoropentanoic acid (PFPeA)	J	0.262	ug/Kg	0.021	1	2706-90-3
Biosolids-1	PFAS Top Assay QSM B15 (Pre)	Perfluoropentanesulfonic acid (PFPeS)	J	0.486	ug/Kg	0.021	1	2706-91-4
Biosolids-1	PFAS Top Assay QSM B15 (Pre)	Perfluorotetradecanoic acid (PFTA)	J	0.034	ug/Kg	0.021	1	376-06-7
Biosolids-1	PFAS Top Assay QSM B15 (Pre)	Perfluorotridecanoic acid (PFTrDA)	U	0.031	ug/Kg	0.031	1	72629-94-8
Biosolids-1	PFAS Top Assay QSM B15 (Pre)	Perfluoroundecanoic acid (PFUnA)	J	0.06	ug/Kg	0.021	1	2058-94-8
Biosolids-2	PFAS Top Assay QSM B15 (Post)	11Cl-PF3OUdS	U	0.02	ug/Kg	0.02	1	763051-92-9
Biosolids-2	PFAS Top Assay QSM B15 (Post)	4:2 Fluorotelomer sulfonic acid (4:2 FTS)	U	0.05	ug/Kg	0.05	1	757124-72-4
Biosolids-2	PFAS Top Assay QSM B15 (Post)	6:2 Fluorotelomer sulfonic acid (6:2FTS)	U	0.06	ug/Kg	0.06	1	27619-97-2
Biosolids-2	PFAS Top Assay QSM B15 (Post)	8:2 Fluorotelomer sulfonic acid (8:2 FTS)	U	0.03	ug/Kg	0.03	1	39108-34-4
Biosolids-2	PFAS Top Assay QSM B15 (Post)	9Cl-PF3ONS	U	0.03	ug/Kg	0.03	1	756426-58-1
Biosolids-2	PFAS Top Assay QSM B15 (Post)	ADONA	U	0.01	ug/Kg	0.01	1	919005-14-4
Biosolids-2	PFAS Top Assay QSM B15 (Post)	Perfluoro-2-proxypropanoic acid (HFPO-DA)	U	0.141	ug/Kg	0.141	1	13252-13-6
Biosolids-2	PFAS Top Assay QSM B15 (Post)	NEtFOSAA	U	0.03	ug/Kg	0.03	1	2991-50-6
Biosolids-2	PFAS Top Assay QSM B15 (Post)	NMeFOSAA	U	0.02	ug/Kg	0.02	1	2355-31-9
Biosolids-2	PFAS Top Assay QSM B15 (Post)	Perfluorobutanoic acid (PFBA)		3.69	ug/Kg	0.04	1	375-22-4
Biosolids-2	PFAS Top Assay QSM B15 (Post)	Perfluorobutanesulfonic acid (PFBS)	J	0.108	ug/Kg	0.02	1	375-73-5
Biosolids-2	PFAS Top Assay QSM B15 (Post)	Perfluorodecanoic acid (PFDA)	J	0.141	ug/Kg	0.04	1	335-76-2
Biosolids-2	PFAS Top Assay QSM B15 (Post)	Perfluorodecane sulfonic acid (PFDS)	J	0.046	ug/Kg	0.03	1	335-77-3
Biosolids-2	PFAS Top Assay QSM B15 (Post)	Perfluorododecanoic acid (PFDoA)	J	0.076	ug/Kg	0.02	1	307-55-1
Biosolids-2	PFAS Top Assay QSM B15 (Post)	Perfluoroheptanoic acid (PFHpA)	J	0.501	ug/Kg	0.02	1	375-85-9
Biosolids-2	PFAS Top Assay QSM B15 (Post)	Perfluoroheptanesulfonic acid (PFHpS)	U	0.02	ug/Kg	0.02	1	375-92-8
Biosolids-2	PFAS Top Assay QSM B15 (Post)	Perfluorohexanoic acid (PFHxA)		1.64	ug/Kg	0.02	1	307-24-4
Biosolids-2	PFAS Top Assay QSM B15 (Post)	Perfluorohexanesulfonic acid (PFHxS)	J	0.037	ug/Kg	0.03	1	355-46-4
Biosolids-2	PFAS Top Assay QSM B15 (Post)	Perfluorononanoic acid (PFNA)	J	0.216	ug/Kg	0.02	1	375-95-1
Biosolids-2	PFAS Top Assay QSM B15 (Post)	Perfluorononanesulfonic acid (PFNS)	U	0.03	ug/Kg	0.03	1	68259-12-1
Biosolids-2	PFAS Top Assay QSM B15 (Post)	Perfluorooctanoic acid (PFOA)	J	0.531	ug/Kg	0.081	1	335-67-1
Biosolids-2	PFAS Top Assay QSM B15 (Post)	Perfluorooctanesulfonic acid (PFOS)	J	0.84	ug/Kg	0.05	1	1763-23-1
Biosolids-2	PFAS Top Assay QSM B15 (Post)	Perfluorooctane Sulfonamide (FOSA)	U	0.02	ug/Kg	0.02	1	754-91-6
Biosolids-2	PFAS Top Assay QSM B15 (Post)	Perfluoropentanoic acid (PFPeA)		3.74	ug/Kg	0.02	1	2706-90-3
Biosolids-2	PFAS Top Assay QSM B15 (Post)	Perfluoropentanesulfonic acid (PFPeS)	U	0.02	ug/Kg	0.02	1	2706-91-4
Biosolids-2	PFAS Top Assay QSM B15 (Post)	Perfluorotetradecanoic acid (PFTA)	J	0.033	ug/Kg	0.02	1	376-06-7
Biosolids-2	PFAS Top Assay QSM B15 (Post)	Perfluorotridecanoic acid (PFTrDA)	U	0.03	ug/Kg	0.03	1	72629-94-8
Biosolids-2	PFAS Top Assay QSM B15 (Post)	Perfluoroundecanoic acid (PFUnA)	J	0.082	ug/Kg	0.02	1	2058-94-8
Biosolids-2	PFAS Top Assay QSM B15 (Pre)	11Cl-PF3OUdS	U	0.021	ug/Kg	0.021	1	763051-92-9
Biosolids-2	PFAS Top Assay QSM B15 (Pre)	4:2 Fluorotelomer sulfonic acid (4:2 FTS)	U	0.052	ug/Kg	0.052	1	757124-72-4
Biosolids-2	PFAS Top Assay QSM B15 (Pre)	6:2 Fluorotelomer sulfonic acid (6:2FTS)	J	0.674	ug/Kg	0.062	1	27619-97-2
Biosolids-2	PFAS Top Assay QSM B15 (Pre)	8:2 Fluorotelomer sulfonic acid (8:2 FTS)	J	0.046	ug/Kg	0.031	1	39108-34-4
Biosolids-2	PFAS Top Assay QSM B15 (Pre)	9Cl-PF3ONS	U	0.031	ug/Kg	0.031	1	756426-58-1
Biosolids-2	PFAS Top Assay QSM B15 (Pre)	ADONA	U	0.01	ug/Kg	0.01	1	919005-14-4
Biosolids-2	PFAS Top Assay QSM B15 (Pre)	Perfluoro-2-proxypropanoic acid (HFPO-DA)	U	0.145	ug/Kg	0.145	1	13252-13-6
Biosolids-2	PFAS Top Assay QSM B15 (Pre)	NEtFOSAA	J	0.172	ug/Kg	0.031	1	2991-50-6
Biosolids-2	PFAS Top Assay QSM B15 (Pre)	NMeFOSAA	J	0.249	ug/Kg	0.021	1	2355-31-9
Biosolids-2	PFAS Top Assay QSM B15 (Pre)	Perfluorobutanoic acid (PFBA)	J	0.148	ug/Kg	0.042	1	375-22-4
Biosolids-2	PFAS Top Assay QSM B15 (Pre)	Perfluorobutanesulfonic acid (PFBS)	U	0.021	ug/Kg	0.021	1	375-73-5
Biosolids-2	PFAS Top Assay QSM B15 (Pre)	Perfluorodecanoic acid (PFDA)	J	0.112	ug/Kg	0.042	1	335-76-2
Biosolids-2	PFAS Top Assay QSM B15 (Pre)	Perfluorodecane sulfonic acid (PFDS)	U	0.031	ug/Kg	0.031	1	335-77-3
Biosolids-2	PFAS Top Assay QSM B15 (Pre)	Perfluorododecanoic acid (PFDoA)	J	0.096	ug/Kg	0.021	1	307-55-1
Biosolids-2	PFAS Top Assay QSM B15 (Pre)	Perfluoroheptanoic acid (PFHpA)	J	0.07	ug/Kg	0.021	1	375-85-9
Biosolids-2	PFAS Top Assay QSM B15 (Pre)	Perfluoroheptanesulfonic acid (PFHpS)	J	0.05	ug/Kg	0.021	1	375-92-8
Biosolids-2	PFAS Top Assay QSM B15 (Pre)	Perfluorohexanoic acid (PFHxA)	J	0.747	ug/Kg	0.021	1	307-24-4
Biosolids-2	PFAS Top Assay QSM B15 (Pre)	Perfluorohexanesulfonic acid (PFHxS)	J	0.279	ug/Kg	0.031	1	355-46-4
Biosolids-2	PFAS Top Assay QSM B15 (Pre)	Perfluorononanoic acid (PFNA)	J	0.066	ug/Kg	0.021	1	375-95-1
Biosolids-2	PFAS Top Assay QSM B15 (Pre)	Perfluorononanesulfonic acid (PFNS)	U	0.031	ug/Kg	0.031	1	68259-12-1
Biosolids-2	PFAS Top Assay QSM B15 (Pre)	Perfluorooctanoic acid (PFOA)	J	0.18	ug/Kg	0.083	1	335-67-1
Biosolids-2	PFAS Top Assay QSM B15 (Pre)	Perfluorooctanesulfonic acid (PFOS)	J	0.315	ug/Kg	0.052	1	1763-23-1
Biosolids-2	PFAS Top Assay QSM B15 (Pre)	Perfluorooctane Sulfonamide (FOSA)	J	0.035	ug/Kg	0.021	1	754-91-6
Biosolids-2	PFAS Top Assay QSM B15 (Pre)	Perfluoropentanoic acid (PFPeA)	J	0.378	ug/Kg	0.021	1	2706-90-3
Biosolids-2	PFAS Top Assay QSM B15 (Pre)	Perfluoropentanesulfonic acid (PFPeS)	J	0.022	ug/Kg	0.021	1	2706-91-4
Biosolids-2	PFAS Top Assay QSM B15 (Pre)	Perfluorotetradecanoic acid (PFTA)	J	0.037	ug/Kg	0.021	1	376-06-7
Biosolids-2	PFAS Top Assay QSM B15 (Pre)	Perfluorotridecanoic acid (PFTrDA)	U	0.031	ug/Kg	0.031	1	72629-94-8
Biosolids-2	PFAS Top Assay QSM B15 (Pre)	Perfluoroundecanoic acid (PFUnA)	J	0.053	ug/Kg	0.021	1	2058-94-8
Biosolids-3	PFAS Top Assay QSM B15 (Post)	11Cl-PF3OUdS	U	0.02	ug/Kg	0.02	1	763051-92-9
Biosolids-3	PFAS Top Assay QSM B15 (Post)	4:2 Fluorotelomer sulfonic acid (4:2 FTS)	U	0.05	ug/Kg	0.05	1	757124-72-4
Biosolids-3	PFAS Top Assay QSM B15 (Post)	6:2 Fluorotelomer sulfonic acid (6:2FTS)	U	0.06	ug/Kg	0.06	1	27619-97-2
Biosolids-3	PFAS Top Assay QSM B15 (Post)	8:2 Fluorotelomer sulfonic acid (8:2 FTS)	U	0.03	ug/Kg	0.03	1	39108-34-4
Biosolids-3	PFAS Top Assay QSM B15 (Post)	9Cl-PF3ONS	U	0.03	ug/Kg	0.03	1	756426-58-1
Biosolids-3	PFAS Top Assay QSM B15 (Post)	ADONA	U	0.00994	ug/Kg	0.00994	1	919005-14-4
Biosolids-3	PFAS Top Assay QSM B15 (Post)	Perfluoro-2-proxypropanoic acid (HFPO-DA)	U	0.139	ug/Kg	0.139	1	13252-13-6
Biosolids-3	PFAS Top Assay QSM B15 (Post)	NEtFOSAA	U	0.03	ug/Kg	0.03	1	2991-50-6
Biosolids-3	PFAS Top Assay QSM B15 (Post)	NMeFOSAA	U	0.02	ug/Kg	0.02	1	2355-31-9
Biosolids-3	PFAS Top Assay QSM B15 (Post)	Perfluorobutanoic acid (PFBA)		2.2	ug/Kg	0.04	1	375-22-4
Biosolids-3	PFAS Top Assay QSM B15 (Post)	Perfluorobutanesulfonic acid (PFBS)	J	0.056	ug/Kg	0.02	1	375-73-5
Biosolids-3	PFAS Top Assay QSM B15 (Post)	Perfluorodecanoic acid (PFDA)	J	0.098	ug/Kg	0.04	1	335-76-2
Biosolids-3	PFAS Top Assay QSM B15 (Post)	Perfluorodecane sulfonic acid (PFDS)	U	0.03	ug/Kg	0.03	1	335-77-3
Biosolids-3	PFAS Top Assay QSM B15 (Post)	Perfluorododecanoic acid (PFDoA)	J	0.044	ug/Kg	0.02	1	307-55-1
Biosolids-3	PFAS Top Assay QSM B15 (Post)	Perfluoroheptanoic acid (PFHpA)	J	0.358	ug/Kg	0.02	1	375-85-9
Biosolids-3	PFAS Top Assay QSM B15 (Post)	Perfluoroheptanesulfonic acid (PFHpS)	U	0.02	ug/Kg	0.02	1	375-92-8
Biosolids-3	PFAS Top Assay QSM B15 (Post)	Perfluorohexanoic acid (PFHxA)		0.954	ug/Kg	0.02	1	307-24-4
Biosolids-3	PFAS Top Assay QSM B15 (Post)	Perfluorohexanesulfonic acid (PFHxS)	U	0.03	ug/Kg	0.03	1	355-46-4
Biosolids-3	PFAS Top Assay QSM B15 (Post)	Perfluorononanoic acid (PFNA)	J	0.14	ug/Kg	0.02	1	375-95-1
Biosolids-3	PFAS Top Assay QSM B15 (Post)	Perfluorononanesulfonic acid (PFNS)	U	0.03	ug/Kg	0.03	1	68259-12-1
Biosolids-3	PFAS Top Assay QSM B15 (Post)	Perfluorooctanoic acid (PFOA)	J	0.35	ug/Kg	0.08	1	335-67-1
Biosolids-3	PFAS Top Assay QSM B15 (Post)	Perfluorooctanesulfonic acid (PFOS)	J	0.309	ug/Kg	0.05	1	1763-23-1
Biosolids-3	PFAS Top Assay QSM B15 (Post)	Perfluorooctane Sulfonamide (FOSA)	U	0.02	ug/Kg	0.02	1	754-91-6
Biosolids-3	PFAS Top Assay QSM B15 (Post)	Perfluoropentanoic acid (PFPeA)		1.99	ug/Kg	0.02	1	2706-90-3
Biosolids-3	PFAS Top Assay QSM B15 (Post)	Perfluoropentanesulfonic acid (PFPeS)	U	0.02	ug/Kg	0.02	1	2706-91-4
Biosolids-3	PFAS Top Assay QSM B15 (Post)	Perfluorotetradecanoic acid (PFTA)	J	0.024	ug/Kg	0.02	1	376-06-7
Biosolids-3	PFAS Top Assay QSM B15 (Post)	Perfluorotridecanoic acid (PFTrDA)	U	0.03	ug/Kg	0.03	1	72629-94-8
Biosolids-3	PFAS Top Assay QSM B15 (Post)	Perfluoroundecanoic acid (PFUnA)	J	0.055	ug/Kg	0.02	1	2058-94-8
Biosolids-3	PFAS Top Assay QSM B15 (Pre)	11Cl-PF3OUdS	U	0.021	ug/Kg	0.021	1	763051-92-9
Biosolids-3	PFAS Top Assay QSM B15 (Pre)	4:2 Fluorotelomer sulfonic acid (4:2 FTS)	U	0.053	ug/Kg	0.053	1	757124-72-4
Biosolids-3	PFAS Top Assay QSM B15 (Pre)	6:2 Fluorotelomer sulfonic acid (6:2FTS)	J	0.93	ug/Kg	0.063	1	27619-97-2
Biosolids-3	PFAS Top Assay QSM B15 (Pre)	8:2 Fluorotelomer sulfonic acid (8:2 FTS)	J	0.068	ug/Kg	0.032	1	39108-34-4
Biosolids-3	PFAS Top Assay QSM B15 (Pre)	9Cl-PF3ONS	U	0.032	ug/Kg	0.032	1	756426-58-1
Biosolids-3	PFAS Top Assay QSM B15 (Pre)	ADONA	U	0.011	ug/Kg	0.011	1	919005-14-4
Biosolids-3	PFAS Top Assay QSM B15 (Pre)	Perfluoro-2-proxypropanoic acid (HFPO-DA)	U	0.147	ug/Kg	0.147	1	13252-13-6
Biosolids-3	PFAS Top Assay QSM B15 (Pre)	NEtFOSAA	J	0.225	ug/Kg	0.032	1	2991-50-6
Biosolids-3	PFAS Top Assay QSM B15 (Pre)	NMeFOSAA	J	0.314	ug/Kg	0.021	1	2355-31-9
Biosolids-3	PFAS Top Assay QSM B15 (Pre)	Perfluorobutanoic acid (PFBA)	J	0.516	ug/Kg	0.042	1	375-22-4
Biosolids-3	PFAS Top Assay QSM B15 (Pre)	Perfluorobutanesulfonic acid (PFBS)	J	0.046	ug/Kg	0.021	1	375-73-5
Biosolids-3	PFAS Top Assay QSM B15 (Pre)	Perfluorodecanoic acid (PFDA)	J	0.171	ug/Kg	0.042	1	335-76-2
Biosolids-3	PFAS Top Assay QSM B15 (Pre)	Perfluorodecane sulfonic acid (PFDS)	U	0.032	ug/Kg	0.032	1	335-77-3
Biosolids-3	PFAS Top Assay QSM B15 (Pre)	Perfluorododecanoic acid (PFDoA)	J	0.106	ug/Kg	0.021	1	307-55-1
Biosolids-3	PFAS Top Assay QSM B15 (Pre)	Perfluoroheptanoic acid (PFHpA)	J	0.23	ug/Kg	0.021	1	375-85-9
Biosolids-3	PFAS Top Assay QSM B15 (Pre)	Perfluoroheptanesulfonic acid (PFHpS)	J	0.081	ug/Kg	0.021	1	375-92-8
Biosolids-3	PFAS Top Assay QSM B15 (Pre)	Perfluorohexanoic acid (PFHxA)		1.13	ug/Kg	0.021	1	307-24-4
Biosolids-3	PFAS Top Assay QSM B15 (Pre)	Perfluorohexanesulfonic acid (PFHxS)	J	0.308	ug/Kg	0.032	1	355-46-4
Biosolids-3	PFAS Top Assay QSM B15 (Pre)	Perfluorononanoic acid (PFNA)	J	0.148	ug/Kg	0.021	1	375-95-1
Biosolids-3	PFAS Top Assay QSM B15 (Pre)	Perfluorononanesulfonic acid (PFNS)	J	0.038	ug/Kg	0.032	1	68259-12-1
Biosolids-3	PFAS Top Assay QSM B15 (Pre)	Perfluorooctanoic acid (PFOA)	J	0.206	ug/Kg	0.084	1	335-67-1
Biosolids-3	PFAS Top Assay QSM B15 (Pre)	Perfluorooctanesulfonic acid (PFOS)		1.25	ug/Kg	0.053	1	1763-23-1
Biosolids-3	PFAS Top Assay QSM B15 (Pre)	Perfluorooctane Sulfonamide (FOSA)	J	0.05	ug/Kg	0.021	1	754-91-6
Biosolids-3	PFAS Top Assay QSM B15 (Pre)	Perfluoropentanoic acid (PFPeA)	J	0.833	ug/Kg	0.021	1	2706-90-3
Biosolids-3	PFAS Top Assay QSM B15 (Pre)	Perfluoropentanesulfonic acid (PFPeS)	J	0.067	ug/Kg	0.021	1	2706-91-4
Biosolids-3	PFAS Top Assay QSM B15 (Pre)	Perfluorotetradecanoic acid (PFTA)	J	0.036	ug/Kg	0.021	1	376-06-7
Biosolids-3	PFAS Top Assay QSM B15 (Pre)	Perfluorotridecanoic acid (PFTrDA)	U	0.032	ug/Kg	0.032	1	72629-94-8
Biosolids-3	PFAS Top Assay QSM B15 (Pre)	Perfluoroundecanoic acid (PFUnA)	J	0.069	ug/Kg	0.021	1	2058-94-8
500-BIOCHAR-1	PFAS Top Assay QSM B15 (Post)	11Cl-PF3OUdS	U	0.097	ug/Kg	0.097	5	763051-92-9
500-BIOCHAR-1	PFAS Top Assay QSM B15 (Post)	4:2 Fluorotelomer sulfonic acid (4:2 FTS)	U	0.242	ug/Kg	0.242	5	757124-72-4
500-BIOCHAR-1	PFAS Top Assay QSM B15 (Post)	6:2 Fluorotelomer sulfonic acid (6:2FTS)	U	0.29	ug/Kg	0.29	5	27619-97-2
500-BIOCHAR-1	PFAS Top Assay QSM B15 (Post)	8:2 Fluorotelomer sulfonic acid (8:2 FTS)	U	0.145	ug/Kg	0.145	5	39108-34-4
500-BIOCHAR-1	PFAS Top Assay QSM B15 (Post)	9Cl-PF3ONS	U	0.145	ug/Kg	0.145	5	756426-58-1
500-BIOCHAR-1	PFAS Top Assay QSM B15 (Post)	ADONA	U	0.048	ug/Kg	0.048	5	919005-14-4
500-BIOCHAR-1	PFAS Top Assay QSM B15 (Post)	Perfluoro-2-proxypropanoic acid (HFPO-DA)	U	0.678	ug/Kg	0.678	5	13252-13-6
500-BIOCHAR-1	PFAS Top Assay QSM B15 (Post)	NEtFOSAA	U	0.145	ug/Kg	0.145	5	2991-50-6
500-BIOCHAR-1	PFAS Top Assay QSM B15 (Post)	NMeFOSAA	U	0.097	ug/Kg	0.097	5	2355-31-9
500-BIOCHAR-1	PFAS Top Assay QSM B15 (Post)	Perfluorobutanoic acid (PFBA)	U	0.194	ug/Kg	0.194	5	375-22-4
500-BIOCHAR-1	PFAS Top Assay QSM B15 (Post)	Perfluorobutanesulfonic acid (PFBS)	U	0.097	ug/Kg	0.097	5	375-73-5
500-BIOCHAR-1	PFAS Top Assay QSM B15 (Post)	Perfluorodecanoic acid (PFDA)	U	0.194	ug/Kg	0.194	5	335-76-2
500-BIOCHAR-1	PFAS Top Assay QSM B15 (Post)	Perfluorodecane sulfonic acid (PFDS)	U	0.145	ug/Kg	0.145	5	335-77-3
500-BIOCHAR-1	PFAS Top Assay QSM B15 (Post)	Perfluorododecanoic acid (PFDoA)	U	0.097	ug/Kg	0.097	5	307-55-1
500-BIOCHAR-1	PFAS Top Assay QSM B15 (Post)	Perfluoroheptanoic acid (PFHpA)	U	0.097	ug/Kg	0.097	5	375-85-9
500-BIOCHAR-1	PFAS Top Assay QSM B15 (Post)	Perfluoroheptanesulfonic acid (PFHpS)	U	0.097	ug/Kg	0.097	5	375-92-8
500-BIOCHAR-1	PFAS Top Assay QSM B15 (Post)	Perfluorohexanoic acid (PFHxA)	U	0.097	ug/Kg	0.097	5	307-24-4
500-BIOCHAR-1	PFAS Top Assay QSM B15 (Post)	Perfluorohexanesulfonic acid (PFHxS)	U	0.145	ug/Kg	0.145	5	355-46-4
500-BIOCHAR-1	PFAS Top Assay QSM B15 (Post)	Perfluorononanoic acid (PFNA)	U	0.097	ug/Kg	0.097	5	375-95-1
500-BIOCHAR-1	PFAS Top Assay QSM B15 (Post)	Perfluorononanesulfonic acid (PFNS)	U	0.145	ug/Kg	0.145	5	68259-12-1
500-BIOCHAR-1	PFAS Top Assay QSM B15 (Post)	Perfluorooctanoic acid (PFOA)	U	0.387	ug/Kg	0.387	5	335-67-1
500-BIOCHAR-1	PFAS Top Assay QSM B15 (Post)	Perfluorooctanesulfonic acid (PFOS)	U	0.242	ug/Kg	0.242	5	1763-23-1
500-BIOCHAR-1	PFAS Top Assay QSM B15 (Post)	Perfluorooctane Sulfonamide (FOSA)	U	0.097	ug/Kg	0.097	5	754-91-6
500-BIOCHAR-1	PFAS Top Assay QSM B15 (Post)	Perfluoropentanoic acid (PFPeA)	U	0.097	ug/Kg	0.097	5	2706-90-3
500-BIOCHAR-1	PFAS Top Assay QSM B15 (Post)	Perfluoropentanesulfonic acid (PFPeS)	U	0.097	ug/Kg	0.097	5	2706-91-4
500-BIOCHAR-1	PFAS Top Assay QSM B15 (Post)	Perfluorotetradecanoic acid (PFTA)	U	0.097	ug/Kg	0.097	5	376-06-7
500-BIOCHAR-1	PFAS Top Assay QSM B15 (Post)	Perfluorotridecanoic acid (PFTrDA)	U	0.145	ug/Kg	0.145	5	72629-94-8
500-BIOCHAR-1	PFAS Top Assay QSM B15 (Post)	Perfluoroundecanoic acid (PFUnA)	U	0.097	ug/Kg	0.097	5	2058-94-8
500-BIOCHAR-1	PFAS Top Assay QSM B15 (Pre)	11Cl-PF3OUdS	U	0.097	ug/Kg	0.097	5	763051-92-9
500-BIOCHAR-1	PFAS Top Assay QSM B15 (Pre)	4:2 Fluorotelomer sulfonic acid (4:2 FTS)	U	0.242	ug/Kg	0.242	5	757124-72-4
500-BIOCHAR-1	PFAS Top Assay QSM B15 (Pre)	6:2 Fluorotelomer sulfonic acid (6:2FTS)	U	0.29	ug/Kg	0.29	5	27619-97-2
500-BIOCHAR-1	PFAS Top Assay QSM B15 (Pre)	8:2 Fluorotelomer sulfonic acid (8:2 FTS)	U	0.145	ug/Kg	0.145	5	39108-34-4
500-BIOCHAR-1	PFAS Top Assay QSM B15 (Pre)	9Cl-PF3ONS	U	0.145	ug/Kg	0.145	5	756426-58-1
500-BIOCHAR-1	PFAS Top Assay QSM B15 (Pre)	ADONA	U	0.048	ug/Kg	0.048	5	919005-14-4
500-BIOCHAR-1	PFAS Top Assay QSM B15 (Pre)	Perfluoro-2-proxypropanoic acid (HFPO-DA)	U	0.678	ug/Kg	0.678	5	13252-13-6
500-BIOCHAR-1	PFAS Top Assay QSM B15 (Pre)	NEtFOSAA	U	0.145	ug/Kg	0.145	5	2991-50-6
500-BIOCHAR-1	PFAS Top Assay QSM B15 (Pre)	NMeFOSAA	U	0.097	ug/Kg	0.097	5	2355-31-9
500-BIOCHAR-1	PFAS Top Assay QSM B15 (Pre)	Perfluorobutanoic acid (PFBA)	U	0.194	ug/Kg	0.194	5	375-22-4
500-BIOCHAR-1	PFAS Top Assay QSM B15 (Pre)	Perfluorobutanesulfonic acid (PFBS)	U	0.097	ug/Kg	0.097	5	375-73-5
500-BIOCHAR-1	PFAS Top Assay QSM B15 (Pre)	Perfluorodecanoic acid (PFDA)	U	0.194	ug/Kg	0.194	5	335-76-2
500-BIOCHAR-1	PFAS Top Assay QSM B15 (Pre)	Perfluorodecane sulfonic acid (PFDS)	U	0.145	ug/Kg	0.145	5	335-77-3
500-BIOCHAR-1	PFAS Top Assay QSM B15 (Pre)	Perfluorododecanoic acid (PFDoA)	U	0.097	ug/Kg	0.097	5	307-55-1
500-BIOCHAR-1	PFAS Top Assay QSM B15 (Pre)	Perfluoroheptanoic acid (PFHpA)	U	0.097	ug/Kg	0.097	5	375-85-9
500-BIOCHAR-1	PFAS Top Assay QSM B15 (Pre)	Perfluoroheptanesulfonic acid (PFHpS)	U	0.097	ug/Kg	0.097	5	375-92-8
500-BIOCHAR-1	PFAS Top Assay QSM B15 (Pre)	Perfluorohexanoic acid (PFHxA)	U	0.097	ug/Kg	0.097	5	307-24-4
500-BIOCHAR-1	PFAS Top Assay QSM B15 (Pre)	Perfluorohexanesulfonic acid (PFHxS)	U	0.145	ug/Kg	0.145	5	355-46-4
500-BIOCHAR-1	PFAS Top Assay QSM B15 (Pre)	Perfluorononanoic acid (PFNA)	U	0.097	ug/Kg	0.097	5	375-95-1
500-BIOCHAR-1	PFAS Top Assay QSM B15 (Pre)	Perfluorononanesulfonic acid (PFNS)	U	0.145	ug/Kg	0.145	5	68259-12-1
500-BIOCHAR-1	PFAS Top Assay QSM B15 (Pre)	Perfluorooctanoic acid (PFOA)	U	0.387	ug/Kg	0.387	5	335-67-1
500-BIOCHAR-1	PFAS Top Assay QSM B15 (Pre)	Perfluorooctanesulfonic acid (PFOS)	U	0.242	ug/Kg	0.242	5	1763-23-1
500-BIOCHAR-1	PFAS Top Assay QSM B15 (Pre)	Perfluorooctane Sulfonamide (FOSA)	U	0.097	ug/Kg	0.097	5	754-91-6
500-BIOCHAR-1	PFAS Top Assay QSM B15 (Pre)	Perfluoropentanoic acid (PFPeA)	U	0.097	ug/Kg	0.097	5	2706-90-3
500-BIOCHAR-1	PFAS Top Assay QSM B15 (Pre)	Perfluoropentanesulfonic acid (PFPeS)	U	0.097	ug/Kg	0.097	5	2706-91-4
500-BIOCHAR-1	PFAS Top Assay QSM B15 (Pre)	Perfluorotetradecanoic acid (PFTA)	U	0.097	ug/Kg	0.097	5	376-06-7
500-BIOCHAR-1	PFAS Top Assay QSM B15 (Pre)	Perfluorotridecanoic acid (PFTrDA)	U	0.145	ug/Kg	0.145	5	72629-94-8
500-BIOCHAR-1	PFAS Top Assay QSM B15 (Pre)	Perfluoroundecanoic acid (PFUnA)	U	0.097	ug/Kg	0.097	5	2058-94-8
500-BIOCHAR-2	PFAS Top Assay QSM B15 (Post)	11Cl-PF3OUdS	U	0.099	ug/Kg	0.099	5	763051-92-9
500-BIOCHAR-2	PFAS Top Assay QSM B15 (Post)	4:2 Fluorotelomer sulfonic acid (4:2 FTS)	U	0.247	ug/Kg	0.247	5	757124-72-4
500-BIOCHAR-2	PFAS Top Assay QSM B15 (Post)	6:2 Fluorotelomer sulfonic acid (6:2FTS)	U	0.296	ug/Kg	0.296	5	27619-97-2
500-BIOCHAR-2	PFAS Top Assay QSM B15 (Post)	8:2 Fluorotelomer sulfonic acid (8:2 FTS)	U	0.148	ug/Kg	0.148	5	39108-34-4
500-BIOCHAR-2	PFAS Top Assay QSM B15 (Post)	9Cl-PF3ONS	U	0.148	ug/Kg	0.148	5	756426-58-1
500-BIOCHAR-2	PFAS Top Assay QSM B15 (Post)	ADONA	U	0.049	ug/Kg	0.049	5	919005-14-4
500-BIOCHAR-2	PFAS Top Assay QSM B15 (Post)	Perfluoro-2-proxypropanoic acid (HFPO-DA)	U	0.69	ug/Kg	0.69	5	13252-13-6
500-BIOCHAR-2	PFAS Top Assay QSM B15 (Post)	NEtFOSAA	U	0.148	ug/Kg	0.148	5	2991-50-6
500-BIOCHAR-2	PFAS Top Assay QSM B15 (Post)	NMeFOSAA	U	0.099	ug/Kg	0.099	5	2355-31-9
500-BIOCHAR-2	PFAS Top Assay QSM B15 (Post)	Perfluorobutanoic acid (PFBA)	U	0.197	ug/Kg	0.197	5	375-22-4
500-BIOCHAR-2	PFAS Top Assay QSM B15 (Post)	Perfluorobutanesulfonic acid (PFBS)	U	0.099	ug/Kg	0.099	5	375-73-5
500-BIOCHAR-2	PFAS Top Assay QSM B15 (Post)	Perfluorodecanoic acid (PFDA)	U	0.197	ug/Kg	0.197	5	335-76-2
500-BIOCHAR-2	PFAS Top Assay QSM B15 (Post)	Perfluorodecane sulfonic acid (PFDS)	U	0.148	ug/Kg	0.148	5	335-77-3
500-BIOCHAR-2	PFAS Top Assay QSM B15 (Post)	Perfluorododecanoic acid (PFDoA)	U	0.099	ug/Kg	0.099	5	307-55-1
500-BIOCHAR-2	PFAS Top Assay QSM B15 (Post)	Perfluoroheptanoic acid (PFHpA)	U	0.099	ug/Kg	0.099	5	375-85-9
500-BIOCHAR-2	PFAS Top Assay QSM B15 (Post)	Perfluoroheptanesulfonic acid (PFHpS)	U	0.099	ug/Kg	0.099	5	375-92-8
500-BIOCHAR-2	PFAS Top Assay QSM B15 (Post)	Perfluorohexanoic acid (PFHxA)	U	0.099	ug/Kg	0.099	5	307-24-4
500-BIOCHAR-2	PFAS Top Assay QSM B15 (Post)	Perfluorohexanesulfonic acid (PFHxS)	U	0.148	ug/Kg	0.148	5	355-46-4
500-BIOCHAR-2	PFAS Top Assay QSM B15 (Post)	Perfluorononanoic acid (PFNA)	U	0.099	ug/Kg	0.099	5	375-95-1
500-BIOCHAR-2	PFAS Top Assay QSM B15 (Post)	Perfluorononanesulfonic acid (PFNS)	U	0.148	ug/Kg	0.148	5	68259-12-1
500-BIOCHAR-2	PFAS Top Assay QSM B15 (Post)	Perfluorooctanoic acid (PFOA)	U	0.395	ug/Kg	0.395	5	335-67-1
500-BIOCHAR-2	PFAS Top Assay QSM B15 (Post)	Perfluorooctanesulfonic acid (PFOS)	U	0.247	ug/Kg	0.247	5	1763-23-1
500-BIOCHAR-2	PFAS Top Assay QSM B15 (Post)	Perfluorooctane Sulfonamide (FOSA)	U	0.099	ug/Kg	0.099	5	754-91-6
500-BIOCHAR-2	PFAS Top Assay QSM B15 (Post)	Perfluoropentanoic acid (PFPeA)	U	0.099	ug/Kg	0.099	5	2706-90-3
500-BIOCHAR-2	PFAS Top Assay QSM B15 (Post)	Perfluoropentanesulfonic acid (PFPeS)	U	0.099	ug/Kg	0.099	5	2706-91-4
500-BIOCHAR-2	PFAS Top Assay QSM B15 (Post)	Perfluorotetradecanoic acid (PFTA)	U	0.099	ug/Kg	0.099	5	376-06-7
500-BIOCHAR-2	PFAS Top Assay QSM B15 (Post)	Perfluorotridecanoic acid (PFTrDA)	U	0.148	ug/Kg	0.148	5	72629-94-8
500-BIOCHAR-2	PFAS Top Assay QSM B15 (Post)	Perfluoroundecanoic acid (PFUnA)	U	0.099	ug/Kg	0.099	5	2058-94-8
500-BIOCHAR-2	PFAS Top Assay QSM B15 (Pre)	11Cl-PF3OUdS	U	0.098	ug/Kg	0.098	5	763051-92-9
500-BIOCHAR-2	PFAS Top Assay QSM B15 (Pre)	4:2 Fluorotelomer sulfonic acid (4:2 FTS)	U	0.246	ug/Kg	0.246	5	757124-72-4
500-BIOCHAR-2	PFAS Top Assay QSM B15 (Pre)	6:2 Fluorotelomer sulfonic acid (6:2FTS)	U	0.295	ug/Kg	0.295	5	27619-97-2
500-BIOCHAR-2	PFAS Top Assay QSM B15 (Pre)	8:2 Fluorotelomer sulfonic acid (8:2 FTS)	U	0.148	ug/Kg	0.148	5	39108-34-4
500-BIOCHAR-2	PFAS Top Assay QSM B15 (Pre)	9Cl-PF3ONS	U	0.148	ug/Kg	0.148	5	756426-58-1
500-BIOCHAR-2	PFAS Top Assay QSM B15 (Pre)	ADONA	U	0.049	ug/Kg	0.049	5	919005-14-4
500-BIOCHAR-2	PFAS Top Assay QSM B15 (Pre)	Perfluoro-2-proxypropanoic acid (HFPO-DA)	U	0.689	ug/Kg	0.689	5	13252-13-6
500-BIOCHAR-2	PFAS Top Assay QSM B15 (Pre)	NEtFOSAA	U	0.148	ug/Kg	0.148	5	2991-50-6
500-BIOCHAR-2	PFAS Top Assay QSM B15 (Pre)	NMeFOSAA	U	0.098	ug/Kg	0.098	5	2355-31-9
500-BIOCHAR-2	PFAS Top Assay QSM B15 (Pre)	Perfluorobutanoic acid (PFBA)	U	0.197	ug/Kg	0.197	5	375-22-4
500-BIOCHAR-2	PFAS Top Assay QSM B15 (Pre)	Perfluorobutanesulfonic acid (PFBS)	U	0.098	ug/Kg	0.098	5	375-73-5
500-BIOCHAR-2	PFAS Top Assay QSM B15 (Pre)	Perfluorodecanoic acid (PFDA)	U	0.197	ug/Kg	0.197	5	335-76-2
500-BIOCHAR-2	PFAS Top Assay QSM B15 (Pre)	Perfluorodecane sulfonic acid (PFDS)	U	0.148	ug/Kg	0.148	5	335-77-3
500-BIOCHAR-2	PFAS Top Assay QSM B15 (Pre)	Perfluorododecanoic acid (PFDoA)	U	0.098	ug/Kg	0.098	5	307-55-1
500-BIOCHAR-2	PFAS Top Assay QSM B15 (Pre)	Perfluoroheptanoic acid (PFHpA)	U	0.098	ug/Kg	0.098	5	375-85-9
500-BIOCHAR-2	PFAS Top Assay QSM B15 (Pre)	Perfluoroheptanesulfonic acid (PFHpS)	U	0.098	ug/Kg	0.098	5	375-92-8
500-BIOCHAR-2	PFAS Top Assay QSM B15 (Pre)	Perfluorohexanoic acid (PFHxA)	U	0.098	ug/Kg	0.098	5	307-24-4
500-BIOCHAR-2	PFAS Top Assay QSM B15 (Pre)	Perfluorohexanesulfonic acid (PFHxS)	U	0.148	ug/Kg	0.148	5	355-46-4
500-BIOCHAR-2	PFAS Top Assay QSM B15 (Pre)	Perfluorononanoic acid (PFNA)	U	0.098	ug/Kg	0.098	5	375-95-1
500-BIOCHAR-2	PFAS Top Assay QSM B15 (Pre)	Perfluorononanesulfonic acid (PFNS)	U	0.148	ug/Kg	0.148	5	68259-12-1
500-BIOCHAR-2	PFAS Top Assay QSM B15 (Pre)	Perfluorooctanoic acid (PFOA)	U	0.394	ug/Kg	0.394	5	335-67-1
500-BIOCHAR-2	PFAS Top Assay QSM B15 (Pre)	Perfluorooctanesulfonic acid (PFOS)	U	0.246	ug/Kg	0.246	5	1763-23-1
500-BIOCHAR-2	PFAS Top Assay QSM B15 (Pre)	Perfluorooctane Sulfonamide (FOSA)	U	0.098	ug/Kg	0.098	5	754-91-6
500-BIOCHAR-2	PFAS Top Assay QSM B15 (Pre)	Perfluoropentanoic acid (PFPeA)	U	0.098	ug/Kg	0.098	5	2706-90-3
500-BIOCHAR-2	PFAS Top Assay QSM B15 (Pre)	Perfluoropentanesulfonic acid (PFPeS)	U	0.098	ug/Kg	0.098	5	2706-91-4
500-BIOCHAR-2	PFAS Top Assay QSM B15 (Pre)	Perfluorotetradecanoic acid (PFTA)	U	0.098	ug/Kg	0.098	5	376-06-7
500-BIOCHAR-2	PFAS Top Assay QSM B15 (Pre)	Perfluorotridecanoic acid (PFTrDA)	U	0.148	ug/Kg	0.148	5	72629-94-8
500-BIOCHAR-2	PFAS Top Assay QSM B15 (Pre)	Perfluoroundecanoic acid (PFUnA)	U	0.098	ug/Kg	0.098	5	2058-94-8
500-BIOCHAR-3	PFAS Top Assay QSM B15 (Post)	11Cl-PF3OUdS	U	0.1	ug/Kg	0.1	5	763051-92-9
500-BIOCHAR-3	PFAS Top Assay QSM B15 (Post)	4:2 Fluorotelomer sulfonic acid (4:2 FTS)	U	0.251	ug/Kg	0.251	5	757124-72-4
500-BIOCHAR-3	PFAS Top Assay QSM B15 (Post)	6:2 Fluorotelomer sulfonic acid (6:2FTS)	U	0.301	ug/Kg	0.301	5	27619-97-2
500-BIOCHAR-3	PFAS Top Assay QSM B15 (Post)	8:2 Fluorotelomer sulfonic acid (8:2 FTS)	U	0.15	ug/Kg	0.15	5	39108-34-4
500-BIOCHAR-3	PFAS Top Assay QSM B15 (Post)	9Cl-PF3ONS	U	0.15	ug/Kg	0.15	5	756426-58-1
500-BIOCHAR-3	PFAS Top Assay QSM B15 (Post)	ADONA	U	0.05	ug/Kg	0.05	5	919005-14-4
500-BIOCHAR-3	PFAS Top Assay QSM B15 (Post)	Perfluoro-2-proxypropanoic acid (HFPO-DA)	U	0.702	ug/Kg	0.702	5	13252-13-6
500-BIOCHAR-3	PFAS Top Assay QSM B15 (Post)	NEtFOSAA	U	0.15	ug/Kg	0.15	5	2991-50-6
500-BIOCHAR-3	PFAS Top Assay QSM B15 (Post)	NMeFOSAA	U	0.1	ug/Kg	0.1	5	2355-31-9
500-BIOCHAR-3	PFAS Top Assay QSM B15 (Post)	Perfluorobutanoic acid (PFBA)	U	0.201	ug/Kg	0.201	5	375-22-4
500-BIOCHAR-3	PFAS Top Assay QSM B15 (Post)	Perfluorobutanesulfonic acid (PFBS)	U	0.1	ug/Kg	0.1	5	375-73-5
500-BIOCHAR-3	PFAS Top Assay QSM B15 (Post)	Perfluorodecanoic acid (PFDA)	U	0.201	ug/Kg	0.201	5	335-76-2
500-BIOCHAR-3	PFAS Top Assay QSM B15 (Post)	Perfluorodecane sulfonic acid (PFDS)	U	0.15	ug/Kg	0.15	5	335-77-3
500-BIOCHAR-3	PFAS Top Assay QSM B15 (Post)	Perfluorododecanoic acid (PFDoA)	U	0.1	ug/Kg	0.1	5	307-55-1
500-BIOCHAR-3	PFAS Top Assay QSM B15 (Post)	Perfluoroheptanoic acid (PFHpA)	U	0.1	ug/Kg	0.1	5	375-85-9
500-BIOCHAR-3	PFAS Top Assay QSM B15 (Post)	Perfluoroheptanesulfonic acid (PFHpS)	U	0.1	ug/Kg	0.1	5	375-92-8
500-BIOCHAR-3	PFAS Top Assay QSM B15 (Post)	Perfluorohexanoic acid (PFHxA)	U	0.1	ug/Kg	0.1	5	307-24-4
500-BIOCHAR-3	PFAS Top Assay QSM B15 (Post)	Perfluorohexanesulfonic acid (PFHxS)	U	0.15	ug/Kg	0.15	5	355-46-4
500-BIOCHAR-3	PFAS Top Assay QSM B15 (Post)	Perfluorononanoic acid (PFNA)	U	0.1	ug/Kg	0.1	5	375-95-1
500-BIOCHAR-3	PFAS Top Assay QSM B15 (Post)	Perfluorononanesulfonic acid (PFNS)	U	0.15	ug/Kg	0.15	5	68259-12-1
500-BIOCHAR-3	PFAS Top Assay QSM B15 (Post)	Perfluorooctanoic acid (PFOA)	U	0.401	ug/Kg	0.401	5	335-67-1
500-BIOCHAR-3	PFAS Top Assay QSM B15 (Post)	Perfluorooctanesulfonic acid (PFOS)	U	0.251	ug/Kg	0.251	5	1763-23-1
500-BIOCHAR-3	PFAS Top Assay QSM B15 (Post)	Perfluorooctane Sulfonamide (FOSA)	U	0.1	ug/Kg	0.1	5	754-91-6
500-BIOCHAR-3	PFAS Top Assay QSM B15 (Post)	Perfluoropentanoic acid (PFPeA)	U	0.1	ug/Kg	0.1	5	2706-90-3
500-BIOCHAR-3	PFAS Top Assay QSM B15 (Post)	Perfluoropentanesulfonic acid (PFPeS)	U	0.1	ug/Kg	0.1	5	2706-91-4
500-BIOCHAR-3	PFAS Top Assay QSM B15 (Post)	Perfluorotetradecanoic acid (PFTA)	U	0.1	ug/Kg	0.1	5	376-06-7
500-BIOCHAR-3	PFAS Top Assay QSM B15 (Post)	Perfluorotridecanoic acid (PFTrDA)	U	0.15	ug/Kg	0.15	5	72629-94-8
500-BIOCHAR-3	PFAS Top Assay QSM B15 (Post)	Perfluoroundecanoic acid (PFUnA)	U	0.1	ug/Kg	0.1	5	2058-94-8
500-BIOCHAR-3	PFAS Top Assay QSM B15 (Pre)	11Cl-PF3OUdS	U	0.102	ug/Kg	0.102	5	763051-92-9
500-BIOCHAR-3	PFAS Top Assay QSM B15 (Pre)	4:2 Fluorotelomer sulfonic acid (4:2 FTS)	U	0.256	ug/Kg	0.256	5	757124-72-4
500-BIOCHAR-3	PFAS Top Assay QSM B15 (Pre)	6:2 Fluorotelomer sulfonic acid (6:2FTS)	U	0.307	ug/Kg	0.307	5	27619-97-2
500-BIOCHAR-3	PFAS Top Assay QSM B15 (Pre)	8:2 Fluorotelomer sulfonic acid (8:2 FTS)	U	0.153	ug/Kg	0.153	5	39108-34-4
500-BIOCHAR-3	PFAS Top Assay QSM B15 (Pre)	9Cl-PF3ONS	U	0.153	ug/Kg	0.153	5	756426-58-1
500-BIOCHAR-3	PFAS Top Assay QSM B15 (Pre)	ADONA	U	0.051	ug/Kg	0.051	5	919005-14-4
500-BIOCHAR-3	PFAS Top Assay QSM B15 (Pre)	Perfluoro-2-proxypropanoic acid (HFPO-DA)	U	0.716	ug/Kg	0.716	5	13252-13-6
500-BIOCHAR-3	PFAS Top Assay QSM B15 (Pre)	NEtFOSAA	U	0.153	ug/Kg	0.153	5	2991-50-6
500-BIOCHAR-3	PFAS Top Assay QSM B15 (Pre)	NMeFOSAA	U	0.102	ug/Kg	0.102	5	2355-31-9
500-BIOCHAR-3	PFAS Top Assay QSM B15 (Pre)	Perfluorobutanoic acid (PFBA)	U	0.205	ug/Kg	0.205	5	375-22-4
500-BIOCHAR-3	PFAS Top Assay QSM B15 (Pre)	Perfluorobutanesulfonic acid (PFBS)	U	0.102	ug/Kg	0.102	5	375-73-5
500-BIOCHAR-3	PFAS Top Assay QSM B15 (Pre)	Perfluorodecanoic acid (PFDA)	U	0.205	ug/Kg	0.205	5	335-76-2
500-BIOCHAR-3	PFAS Top Assay QSM B15 (Pre)	Perfluorodecane sulfonic acid (PFDS)	U	0.153	ug/Kg	0.153	5	335-77-3
500-BIOCHAR-3	PFAS Top Assay QSM B15 (Pre)	Perfluorododecanoic acid (PFDoA)	U	0.102	ug/Kg	0.102	5	307-55-1
500-BIOCHAR-3	PFAS Top Assay QSM B15 (Pre)	Perfluoroheptanoic acid (PFHpA)	U	0.102	ug/Kg	0.102	5	375-85-9
500-BIOCHAR-3	PFAS Top Assay QSM B15 (Pre)	Perfluoroheptanesulfonic acid (PFHpS)	U	0.102	ug/Kg	0.102	5	375-92-8
500-BIOCHAR-3	PFAS Top Assay QSM B15 (Pre)	Perfluorohexanoic acid (PFHxA)	U	0.102	ug/Kg	0.102	5	307-24-4
500-BIOCHAR-3	PFAS Top Assay QSM B15 (Pre)	Perfluorohexanesulfonic acid (PFHxS)	U	0.153	ug/Kg	0.153	5	355-46-4
500-BIOCHAR-3	PFAS Top Assay QSM B15 (Pre)	Perfluorononanoic acid (PFNA)	U	0.102	ug/Kg	0.102	5	375-95-1
500-BIOCHAR-3	PFAS Top Assay QSM B15 (Pre)	Perfluorononanesulfonic acid (PFNS)	U	0.153	ug/Kg	0.153	5	68259-12-1
500-BIOCHAR-3	PFAS Top Assay QSM B15 (Pre)	Perfluorooctanoic acid (PFOA)	U	0.409	ug/Kg	0.409	5	335-67-1
500-BIOCHAR-3	PFAS Top Assay QSM B15 (Pre)	Perfluorooctanesulfonic acid (PFOS)	U	0.256	ug/Kg	0.256	5	1763-23-1
500-BIOCHAR-3	PFAS Top Assay QSM B15 (Pre)	Perfluorooctane Sulfonamide (FOSA)	U	0.102	ug/Kg	0.102	5	754-91-6
500-BIOCHAR-3	PFAS Top Assay QSM B15 (Pre)	Perfluoropentanoic acid (PFPeA)	U	0.102	ug/Kg	0.102	5	2706-90-3
500-BIOCHAR-3	PFAS Top Assay QSM B15 (Pre)	Perfluoropentanesulfonic acid (PFPeS)	U	0.102	ug/Kg	0.102	5	2706-91-4
500-BIOCHAR-3	PFAS Top Assay QSM B15 (Pre)	Perfluorotetradecanoic acid (PFTA)	U	0.102	ug/Kg	0.102	5	376-06-7
500-BIOCHAR-3	PFAS Top Assay QSM B15 (Pre)	Perfluorotridecanoic acid (PFTrDA)	U	0.153	ug/Kg	0.153	5	72629-94-8
500-BIOCHAR-3	PFAS Top Assay QSM B15 (Pre)	Perfluoroundecanoic acid (PFUnA)	U	0.102	ug/Kg	0.102	5	2058-94-8
800-BIOCHAR-1	PFAS Top Assay QSM B15 (Post)	11Cl-PF3OUdS	U	0.019	ug/Kg	0.019	1	763051-92-9
800-BIOCHAR-1	PFAS Top Assay QSM B15 (Post)	4:2 Fluorotelomer sulfonic acid (4:2 FTS)	U	0.048	ug/Kg	0.048	1	757124-72-4
800-BIOCHAR-1	PFAS Top Assay QSM B15 (Post)	6:2 Fluorotelomer sulfonic acid (6:2FTS)	U	0.058	ug/Kg	0.058	1	27619-97-2
800-BIOCHAR-1	PFAS Top Assay QSM B15 (Post)	8:2 Fluorotelomer sulfonic acid (8:2 FTS)	U	0.029	ug/Kg	0.029	1	39108-34-4
800-BIOCHAR-1	PFAS Top Assay QSM B15 (Post)	9Cl-PF3ONS	U	0.029	ug/Kg	0.029	1	756426-58-1
800-BIOCHAR-1	PFAS Top Assay QSM B15 (Post)	ADONA	U	0.00969	ug/Kg	0.00969	1	919005-14-4
800-BIOCHAR-1	PFAS Top Assay QSM B15 (Post)	Perfluoro-2-proxypropanoic acid (HFPO-DA)	U	0.136	ug/Kg	0.136	1	13252-13-6
800-BIOCHAR-1	PFAS Top Assay QSM B15 (Post)	NEtFOSAA	U	0.029	ug/Kg	0.029	1	2991-50-6
800-BIOCHAR-1	PFAS Top Assay QSM B15 (Post)	NMeFOSAA	U	0.019	ug/Kg	0.019	1	2355-31-9
800-BIOCHAR-1	PFAS Top Assay QSM B15 (Post)	Perfluorobutanoic acid (PFBA)	U	0.039	ug/Kg	0.039	1	375-22-4
800-BIOCHAR-1	PFAS Top Assay QSM B15 (Post)	Perfluorobutanesulfonic acid (PFBS)	U	0.019	ug/Kg	0.019	1	375-73-5
800-BIOCHAR-1	PFAS Top Assay QSM B15 (Post)	Perfluorodecanoic acid (PFDA)	U	0.039	ug/Kg	0.039	1	335-76-2
800-BIOCHAR-1	PFAS Top Assay QSM B15 (Post)	Perfluorodecane sulfonic acid (PFDS)	U	0.029	ug/Kg	0.029	1	335-77-3
800-BIOCHAR-1	PFAS Top Assay QSM B15 (Post)	Perfluorododecanoic acid (PFDoA)	U	0.019	ug/Kg	0.019	1	307-55-1
800-BIOCHAR-1	PFAS Top Assay QSM B15 (Post)	Perfluoroheptanoic acid (PFHpA)	U	0.019	ug/Kg	0.019	1	375-85-9
800-BIOCHAR-1	PFAS Top Assay QSM B15 (Post)	Perfluoroheptanesulfonic acid (PFHpS)	U	0.019	ug/Kg	0.019	1	375-92-8
800-BIOCHAR-1	PFAS Top Assay QSM B15 (Post)	Perfluorohexanoic acid (PFHxA)	U	0.019	ug/Kg	0.019	1	307-24-4
800-BIOCHAR-1	PFAS Top Assay QSM B15 (Post)	Perfluorohexanesulfonic acid (PFHxS)	U	0.029	ug/Kg	0.029	1	355-46-4
800-BIOCHAR-1	PFAS Top Assay QSM B15 (Post)	Perfluorononanoic acid (PFNA)	U	0.019	ug/Kg	0.019	1	375-95-1
800-BIOCHAR-1	PFAS Top Assay QSM B15 (Post)	Perfluorononanesulfonic acid (PFNS)	U	0.029	ug/Kg	0.029	1	68259-12-1
800-BIOCHAR-1	PFAS Top Assay QSM B15 (Post)	Perfluorooctanoic acid (PFOA)	U	0.078	ug/Kg	0.078	1	335-67-1
800-BIOCHAR-1	PFAS Top Assay QSM B15 (Post)	Perfluorooctanesulfonic acid (PFOS)	U	0.048	ug/Kg	0.048	1	1763-23-1
800-BIOCHAR-1	PFAS Top Assay QSM B15 (Post)	Perfluorooctane Sulfonamide (FOSA)	U	0.019	ug/Kg	0.019	1	754-91-6
800-BIOCHAR-1	PFAS Top Assay QSM B15 (Post)	Perfluoropentanoic acid (PFPeA)	J	0.02	ug/Kg	0.019	1	2706-90-3
800-BIOCHAR-1	PFAS Top Assay QSM B15 (Post)	Perfluoropentanesulfonic acid (PFPeS)	U	0.019	ug/Kg	0.019	1	2706-91-4
800-BIOCHAR-1	PFAS Top Assay QSM B15 (Post)	Perfluorotetradecanoic acid (PFTA)	U	0.019	ug/Kg	0.019	1	376-06-7
800-BIOCHAR-1	PFAS Top Assay QSM B15 (Post)	Perfluorotridecanoic acid (PFTrDA)	U	0.029	ug/Kg	0.029	1	72629-94-8
800-BIOCHAR-1	PFAS Top Assay QSM B15 (Post)	Perfluoroundecanoic acid (PFUnA)	U	0.019	ug/Kg	0.019	1	2058-94-8
800-BIOCHAR-1	PFAS Top Assay QSM B15 (Pre)	11Cl-PF3OUdS	U	0.019	ug/Kg	0.019	1	763051-92-9
800-BIOCHAR-1	PFAS Top Assay QSM B15 (Pre)	4:2 Fluorotelomer sulfonic acid (4:2 FTS)	U	0.049	ug/Kg	0.049	1	757124-72-4
800-BIOCHAR-1	PFAS Top Assay QSM B15 (Pre)	6:2 Fluorotelomer sulfonic acid (6:2FTS)	U	0.058	ug/Kg	0.058	1	27619-97-2
800-BIOCHAR-1	PFAS Top Assay QSM B15 (Pre)	8:2 Fluorotelomer sulfonic acid (8:2 FTS)	U	0.029	ug/Kg	0.029	1	39108-34-4
800-BIOCHAR-1	PFAS Top Assay QSM B15 (Pre)	9Cl-PF3ONS	U	0.029	ug/Kg	0.029	1	756426-58-1
800-BIOCHAR-1	PFAS Top Assay QSM B15 (Pre)	ADONA	U	0.00973	ug/Kg	0.00973	1	919005-14-4
800-BIOCHAR-1	PFAS Top Assay QSM B15 (Pre)	Perfluoro-2-proxypropanoic acid (HFPO-DA)	U	0.136	ug/Kg	0.136	1	13252-13-6
800-BIOCHAR-1	PFAS Top Assay QSM B15 (Pre)	NEtFOSAA	U	0.029	ug/Kg	0.029	1	2991-50-6
800-BIOCHAR-1	PFAS Top Assay QSM B15 (Pre)	NMeFOSAA	U	0.019	ug/Kg	0.019	1	2355-31-9
800-BIOCHAR-1	PFAS Top Assay QSM B15 (Pre)	Perfluorobutanoic acid (PFBA)	U	0.039	ug/Kg	0.039	1	375-22-4
800-BIOCHAR-1	PFAS Top Assay QSM B15 (Pre)	Perfluorobutanesulfonic acid (PFBS)	U	0.019	ug/Kg	0.019	1	375-73-5
800-BIOCHAR-1	PFAS Top Assay QSM B15 (Pre)	Perfluorodecanoic acid (PFDA)	U	0.039	ug/Kg	0.039	1	335-76-2
800-BIOCHAR-1	PFAS Top Assay QSM B15 (Pre)	Perfluorodecane sulfonic acid (PFDS)	U	0.029	ug/Kg	0.029	1	335-77-3
800-BIOCHAR-1	PFAS Top Assay QSM B15 (Pre)	Perfluorododecanoic acid (PFDoA)	U	0.019	ug/Kg	0.019	1	307-55-1
800-BIOCHAR-1	PFAS Top Assay QSM B15 (Pre)	Perfluoroheptanoic acid (PFHpA)	U	0.019	ug/Kg	0.019	1	375-85-9
800-BIOCHAR-1	PFAS Top Assay QSM B15 (Pre)	Perfluoroheptanesulfonic acid (PFHpS)	U	0.019	ug/Kg	0.019	1	375-92-8
800-BIOCHAR-1	PFAS Top Assay QSM B15 (Pre)	Perfluorohexanoic acid (PFHxA)	U	0.019	ug/Kg	0.019	1	307-24-4
800-BIOCHAR-1	PFAS Top Assay QSM B15 (Pre)	Perfluorohexanesulfonic acid (PFHxS)	U	0.029	ug/Kg	0.029	1	355-46-4
800-BIOCHAR-1	PFAS Top Assay QSM B15 (Pre)	Perfluorononanoic acid (PFNA)	U	0.019	ug/Kg	0.019	1	375-95-1
800-BIOCHAR-1	PFAS Top Assay QSM B15 (Pre)	Perfluorononanesulfonic acid (PFNS)	U	0.029	ug/Kg	0.029	1	68259-12-1
800-BIOCHAR-1	PFAS Top Assay QSM B15 (Pre)	Perfluorooctanoic acid (PFOA)	U	0.078	ug/Kg	0.078	1	335-67-1
800-BIOCHAR-1	PFAS Top Assay QSM B15 (Pre)	Perfluorooctanesulfonic acid (PFOS)	U	0.049	ug/Kg	0.049	1	1763-23-1
800-BIOCHAR-1	PFAS Top Assay QSM B15 (Pre)	Perfluorooctane Sulfonamide (FOSA)	U	0.019	ug/Kg	0.019	1	754-91-6
800-BIOCHAR-1	PFAS Top Assay QSM B15 (Pre)	Perfluoropentanoic acid (PFPeA)	U	0.019	ug/Kg	0.019	1	2706-90-3
800-BIOCHAR-1	PFAS Top Assay QSM B15 (Pre)	Perfluoropentanesulfonic acid (PFPeS)	U	0.019	ug/Kg	0.019	1	2706-91-4
800-BIOCHAR-1	PFAS Top Assay QSM B15 (Pre)	Perfluorotetradecanoic acid (PFTA)	U	0.019	ug/Kg	0.019	1	376-06-7
800-BIOCHAR-1	PFAS Top Assay QSM B15 (Pre)	Perfluorotridecanoic acid (PFTrDA)	U	0.029	ug/Kg	0.029	1	72629-94-8
800-BIOCHAR-1	PFAS Top Assay QSM B15 (Pre)	Perfluoroundecanoic acid (PFUnA)	U	0.019	ug/Kg	0.019	1	2058-94-8
800-BIOCHAR-2	PFAS Top Assay QSM B15 (Post)	11Cl-PF3OUdS	U	0.02	ug/Kg	0.02	1	763051-92-9
800-BIOCHAR-2	PFAS Top Assay QSM B15 (Post)	4:2 Fluorotelomer sulfonic acid (4:2 FTS)	U	0.049	ug/Kg	0.049	1	757124-72-4
800-BIOCHAR-2	PFAS Top Assay QSM B15 (Post)	6:2 Fluorotelomer sulfonic acid (6:2FTS)	U	0.059	ug/Kg	0.059	1	27619-97-2
800-BIOCHAR-2	PFAS Top Assay QSM B15 (Post)	8:2 Fluorotelomer sulfonic acid (8:2 FTS)	U	0.029	ug/Kg	0.029	1	39108-34-4
800-BIOCHAR-2	PFAS Top Assay QSM B15 (Post)	9Cl-PF3ONS	U	0.029	ug/Kg	0.029	1	756426-58-1
800-BIOCHAR-2	PFAS Top Assay QSM B15 (Post)	ADONA	U	0.0098	ug/Kg	0.0098	1	919005-14-4
800-BIOCHAR-2	PFAS Top Assay QSM B15 (Post)	Perfluoro-2-proxypropanoic acid (HFPO-DA)	U	0.137	ug/Kg	0.137	1	13252-13-6
800-BIOCHAR-2	PFAS Top Assay QSM B15 (Post)	NEtFOSAA	U	0.029	ug/Kg	0.029	1	2991-50-6
800-BIOCHAR-2	PFAS Top Assay QSM B15 (Post)	NMeFOSAA	U	0.02	ug/Kg	0.02	1	2355-31-9
800-BIOCHAR-2	PFAS Top Assay QSM B15 (Post)	Perfluorobutanoic acid (PFBA)	U	0.039	ug/Kg	0.039	1	375-22-4
800-BIOCHAR-2	PFAS Top Assay QSM B15 (Post)	Perfluorobutanoic acid (PFBA)	U	0.038	ug/Kg	0.038	1	375-22-4
800-BIOCHAR-2	PFAS Top Assay QSM B15 (Post)	Perfluorobutanesulfonic acid (PFBS)	U	0.02	ug/Kg	0.02	1	375-73-5
800-BIOCHAR-2	PFAS Top Assay QSM B15 (Post)	Perfluorodecanoic acid (PFDA)	U	0.039	ug/Kg	0.039	1	335-76-2
800-BIOCHAR-2	PFAS Top Assay QSM B15 (Post)	Perfluorodecane sulfonic acid (PFDS)	U	0.029	ug/Kg	0.029	1	335-77-3
800-BIOCHAR-2	PFAS Top Assay QSM B15 (Post)	Perfluorododecanoic acid (PFDoA)	U	0.02	ug/Kg	0.02	1	307-55-1
800-BIOCHAR-2	PFAS Top Assay QSM B15 (Post)	Perfluoroheptanoic acid (PFHpA)	U	0.02	ug/Kg	0.02	1	375-85-9
800-BIOCHAR-2	PFAS Top Assay QSM B15 (Post)	Perfluoroheptanesulfonic acid (PFHpS)	U	0.02	ug/Kg	0.02	1	375-92-8
800-BIOCHAR-2	PFAS Top Assay QSM B15 (Post)	Perfluorohexanoic acid (PFHxA)	U	0.02	ug/Kg	0.02	1	307-24-4
800-BIOCHAR-2	PFAS Top Assay QSM B15 (Post)	Perfluorohexanesulfonic acid (PFHxS)	U	0.029	ug/Kg	0.029	1	355-46-4
800-BIOCHAR-2	PFAS Top Assay QSM B15 (Post)	Perfluorononanoic acid (PFNA)	U	0.02	ug/Kg	0.02	1	375-95-1
800-BIOCHAR-2	PFAS Top Assay QSM B15 (Post)	Perfluorononanesulfonic acid (PFNS)	U	0.029	ug/Kg	0.029	1	68259-12-1
800-BIOCHAR-2	PFAS Top Assay QSM B15 (Post)	Perfluorooctanoic acid (PFOA)	U	0.078	ug/Kg	0.078	1	335-67-1
800-BIOCHAR-2	PFAS Top Assay QSM B15 (Post)	Perfluorooctanesulfonic acid (PFOS)	U	0.049	ug/Kg	0.049	1	1763-23-1
800-BIOCHAR-2	PFAS Top Assay QSM B15 (Post)	Perfluorooctane Sulfonamide (FOSA)	U	0.02	ug/Kg	0.02	1	754-91-6
800-BIOCHAR-2	PFAS Top Assay QSM B15 (Post)	Perfluoropentanoic acid (PFPeA)	U	0.02	ug/Kg	0.02	1	2706-90-3
800-BIOCHAR-2	PFAS Top Assay QSM B15 (Post)	Perfluoropentanesulfonic acid (PFPeS)	U	0.02	ug/Kg	0.02	1	2706-91-4
800-BIOCHAR-2	PFAS Top Assay QSM B15 (Post)	Perfluorotetradecanoic acid (PFTA)	U	0.02	ug/Kg	0.02	1	376-06-7
800-BIOCHAR-2	PFAS Top Assay QSM B15 (Post)	Perfluorotridecanoic acid (PFTrDA)	U	0.029	ug/Kg	0.029	1	72629-94-8
800-BIOCHAR-2	PFAS Top Assay QSM B15 (Post)	Perfluoroundecanoic acid (PFUnA)	U	0.02	ug/Kg	0.02	1	2058-94-8
800-BIOCHAR-2	PFAS Top Assay QSM B15 (Pre)	11Cl-PF3OUdS	U	0.02	ug/Kg	0.02	1	763051-92-9
800-BIOCHAR-2	PFAS Top Assay QSM B15 (Pre)	4:2 Fluorotelomer sulfonic acid (4:2 FTS)	U	0.049	ug/Kg	0.049	1	757124-72-4
800-BIOCHAR-2	PFAS Top Assay QSM B15 (Pre)	6:2 Fluorotelomer sulfonic acid (6:2FTS)	U	0.059	ug/Kg	0.059	1	27619-97-2
800-BIOCHAR-2	PFAS Top Assay QSM B15 (Pre)	8:2 Fluorotelomer sulfonic acid (8:2 FTS)	U	0.029	ug/Kg	0.029	1	39108-34-4
800-BIOCHAR-2	PFAS Top Assay QSM B15 (Pre)	9Cl-PF3ONS	U	0.029	ug/Kg	0.029	1	756426-58-1
800-BIOCHAR-2	PFAS Top Assay QSM B15 (Pre)	ADONA	U	0.0098	ug/Kg	0.0098	1	919005-14-4
800-BIOCHAR-2	PFAS Top Assay QSM B15 (Pre)	Perfluoro-2-proxypropanoic acid (HFPO-DA)	U	0.137	ug/Kg	0.137	1	13252-13-6
800-BIOCHAR-2	PFAS Top Assay QSM B15 (Pre)	NEtFOSAA	U	0.029	ug/Kg	0.029	1	2991-50-6
800-BIOCHAR-2	PFAS Top Assay QSM B15 (Pre)	NMeFOSAA	U	0.02	ug/Kg	0.02	1	2355-31-9
800-BIOCHAR-2	PFAS Top Assay QSM B15 (Pre)	Perfluorobutanoic acid (PFBA)	U	0.039	ug/Kg	0.039	1	375-22-4
800-BIOCHAR-2	PFAS Top Assay QSM B15 (Pre)	Perfluorobutanesulfonic acid (PFBS)	U	0.02	ug/Kg	0.02	1	375-73-5
800-BIOCHAR-2	PFAS Top Assay QSM B15 (Pre)	Perfluorodecanoic acid (PFDA)	U	0.039	ug/Kg	0.039	1	335-76-2
800-BIOCHAR-2	PFAS Top Assay QSM B15 (Pre)	Perfluorodecane sulfonic acid (PFDS)	U	0.029	ug/Kg	0.029	1	335-77-3
800-BIOCHAR-2	PFAS Top Assay QSM B15 (Pre)	Perfluorododecanoic acid (PFDoA)	U	0.02	ug/Kg	0.02	1	307-55-1
800-BIOCHAR-2	PFAS Top Assay QSM B15 (Pre)	Perfluoroheptanoic acid (PFHpA)	U	0.02	ug/Kg	0.02	1	375-85-9
800-BIOCHAR-2	PFAS Top Assay QSM B15 (Pre)	Perfluoroheptanesulfonic acid (PFHpS)	U	0.02	ug/Kg	0.02	1	375-92-8
800-BIOCHAR-2	PFAS Top Assay QSM B15 (Pre)	Perfluorohexanoic acid (PFHxA)	U	0.02	ug/Kg	0.02	1	307-24-4
800-BIOCHAR-2	PFAS Top Assay QSM B15 (Pre)	Perfluorohexanesulfonic acid (PFHxS)	U	0.029	ug/Kg	0.029	1	355-46-4
800-BIOCHAR-2	PFAS Top Assay QSM B15 (Pre)	Perfluorononanoic acid (PFNA)	U	0.02	ug/Kg	0.02	1	375-95-1
800-BIOCHAR-2	PFAS Top Assay QSM B15 (Pre)	Perfluorononanesulfonic acid (PFNS)	U	0.029	ug/Kg	0.029	1	68259-12-1
800-BIOCHAR-2	PFAS Top Assay QSM B15 (Pre)	Perfluorooctanoic acid (PFOA)	U	0.078	ug/Kg	0.078	1	335-67-1
800-BIOCHAR-2	PFAS Top Assay QSM B15 (Pre)	Perfluorooctanesulfonic acid (PFOS)	U	0.049	ug/Kg	0.049	1	1763-23-1
800-BIOCHAR-2	PFAS Top Assay QSM B15 (Pre)	Perfluorooctane Sulfonamide (FOSA)	U	0.02	ug/Kg	0.02	1	754-91-6
800-BIOCHAR-2	PFAS Top Assay QSM B15 (Pre)	Perfluoropentanoic acid (PFPeA)	U	0.02	ug/Kg	0.02	1	2706-90-3
800-BIOCHAR-2	PFAS Top Assay QSM B15 (Pre)	Perfluoropentanesulfonic acid (PFPeS)	U	0.02	ug/Kg	0.02	1	2706-91-4
800-BIOCHAR-2	PFAS Top Assay QSM B15 (Pre)	Perfluorotetradecanoic acid (PFTA)	U	0.02	ug/Kg	0.02	1	376-06-7
800-BIOCHAR-2	PFAS Top Assay QSM B15 (Pre)	Perfluorotridecanoic acid (PFTrDA)	U	0.029	ug/Kg	0.029	1	72629-94-8
800-BIOCHAR-2	PFAS Top Assay QSM B15 (Pre)	Perfluoroundecanoic acid (PFUnA)	U	0.02	ug/Kg	0.02	1	2058-94-8
800-BIOCHAR-3	PFAS Top Assay QSM B15 (Post)	11Cl-PF3OUdS	U	0.021	ug/Kg	0.021	1	763051-92-9
800-BIOCHAR-3	PFAS Top Assay QSM B15 (Post)	4:2 Fluorotelomer sulfonic acid (4:2 FTS)	U	0.052	ug/Kg	0.052	1	757124-72-4
800-BIOCHAR-3	PFAS Top Assay QSM B15 (Post)	6:2 Fluorotelomer sulfonic acid (6:2FTS)	U	0.063	ug/Kg	0.063	1	27619-97-2
800-BIOCHAR-3	PFAS Top Assay QSM B15 (Post)	8:2 Fluorotelomer sulfonic acid (8:2 FTS)	U	0.031	ug/Kg	0.031	1	39108-34-4
800-BIOCHAR-3	PFAS Top Assay QSM B15 (Post)	9Cl-PF3ONS	U	0.031	ug/Kg	0.031	1	756426-58-1
800-BIOCHAR-3	PFAS Top Assay QSM B15 (Post)	ADONA	U	0.01	ug/Kg	0.01	1	919005-14-4
800-BIOCHAR-3	PFAS Top Assay QSM B15 (Post)	Perfluoro-2-proxypropanoic acid (HFPO-DA)	U	0.146	ug/Kg	0.146	1	13252-13-6
800-BIOCHAR-3	PFAS Top Assay QSM B15 (Post)	NEtFOSAA	U	0.031	ug/Kg	0.031	1	2991-50-6
800-BIOCHAR-3	PFAS Top Assay QSM B15 (Post)	NMeFOSAA	U	0.021	ug/Kg	0.021	1	2355-31-9
800-BIOCHAR-3	PFAS Top Assay QSM B15 (Post)	Perfluorobutanoic acid (PFBA)	U	0.042	ug/Kg	0.042	1	375-22-4
800-BIOCHAR-3	PFAS Top Assay QSM B15 (Post)	Perfluorobutanesulfonic acid (PFBS)	U	0.021	ug/Kg	0.021	1	375-73-5
800-BIOCHAR-3	PFAS Top Assay QSM B15 (Post)	Perfluorodecanoic acid (PFDA)	U	0.042	ug/Kg	0.042	1	335-76-2
800-BIOCHAR-3	PFAS Top Assay QSM B15 (Post)	Perfluorodecane sulfonic acid (PFDS)	U	0.031	ug/Kg	0.031	1	335-77-3
800-BIOCHAR-3	PFAS Top Assay QSM B15 (Post)	Perfluorododecanoic acid (PFDoA)	U	0.021	ug/Kg	0.021	1	307-55-1
800-BIOCHAR-3	PFAS Top Assay QSM B15 (Post)	Perfluoroheptanoic acid (PFHpA)	U	0.021	ug/Kg	0.021	1	375-85-9
800-BIOCHAR-3	PFAS Top Assay QSM B15 (Post)	Perfluoroheptanesulfonic acid (PFHpS)	U	0.021	ug/Kg	0.021	1	375-92-8
800-BIOCHAR-3	PFAS Top Assay QSM B15 (Post)	Perfluorohexanoic acid (PFHxA)	U	0.021	ug/Kg	0.021	1	307-24-4
800-BIOCHAR-3	PFAS Top Assay QSM B15 (Post)	Perfluorohexanesulfonic acid (PFHxS)	U	0.031	ug/Kg	0.031	1	355-46-4
800-BIOCHAR-3	PFAS Top Assay QSM B15 (Post)	Perfluorononanoic acid (PFNA)	U	0.021	ug/Kg	0.021	1	375-95-1
800-BIOCHAR-3	PFAS Top Assay QSM B15 (Post)	Perfluorononanesulfonic acid (PFNS)	U	0.031	ug/Kg	0.031	1	68259-12-1
800-BIOCHAR-3	PFAS Top Assay QSM B15 (Post)	Perfluorooctanoic acid (PFOA)	U	0.083	ug/Kg	0.083	1	335-67-1
800-BIOCHAR-3	PFAS Top Assay QSM B15 (Post)	Perfluorooctanesulfonic acid (PFOS)	U	0.052	ug/Kg	0.052	1	1763-23-1
800-BIOCHAR-3	PFAS Top Assay QSM B15 (Post)	Perfluorooctane Sulfonamide (FOSA)	U	0.021	ug/Kg	0.021	1	754-91-6
800-BIOCHAR-3	PFAS Top Assay QSM B15 (Post)	Perfluoropentanoic acid (PFPeA)	J	0.021	ug/Kg	0.021	1	2706-90-3
800-BIOCHAR-3	PFAS Top Assay QSM B15 (Post)	Perfluoropentanesulfonic acid (PFPeS)	U	0.021	ug/Kg	0.021	1	2706-91-4
800-BIOCHAR-3	PFAS Top Assay QSM B15 (Post)	Perfluorotetradecanoic acid (PFTA)	U	0.021	ug/Kg	0.021	1	376-06-7
800-BIOCHAR-3	PFAS Top Assay QSM B15 (Post)	Perfluorotridecanoic acid (PFTrDA)	U	0.031	ug/Kg	0.031	1	72629-94-8
800-BIOCHAR-3	PFAS Top Assay QSM B15 (Post)	Perfluoroundecanoic acid (PFUnA)	U	0.021	ug/Kg	0.021	1	2058-94-8
800-BIOCHAR-3	PFAS Top Assay QSM B15 (Pre)	11Cl-PF3OUdS	U	0.021	ug/Kg	0.021	1	763051-92-9
800-BIOCHAR-3	PFAS Top Assay QSM B15 (Pre)	4:2 Fluorotelomer sulfonic acid (4:2 FTS)	U	0.052	ug/Kg	0.052	1	757124-72-4
800-BIOCHAR-3	PFAS Top Assay QSM B15 (Pre)	6:2 Fluorotelomer sulfonic acid (6:2FTS)	U	0.063	ug/Kg	0.063	1	27619-97-2
800-BIOCHAR-3	PFAS Top Assay QSM B15 (Pre)	8:2 Fluorotelomer sulfonic acid (8:2 FTS)	U	0.031	ug/Kg	0.031	1	39108-34-4
800-BIOCHAR-3	PFAS Top Assay QSM B15 (Pre)	9Cl-PF3ONS	U	0.031	ug/Kg	0.031	1	756426-58-1
800-BIOCHAR-3	PFAS Top Assay QSM B15 (Pre)	ADONA	U	0.01	ug/Kg	0.01	1	919005-14-4
800-BIOCHAR-3	PFAS Top Assay QSM B15 (Pre)	Perfluoro-2-proxypropanoic acid (HFPO-DA)	U	0.146	ug/Kg	0.146	1	13252-13-6
800-BIOCHAR-3	PFAS Top Assay QSM B15 (Pre)	NEtFOSAA	U	0.031	ug/Kg	0.031	1	2991-50-6
800-BIOCHAR-3	PFAS Top Assay QSM B15 (Pre)	NMeFOSAA	U	0.021	ug/Kg	0.021	1	2355-31-9
800-BIOCHAR-3	PFAS Top Assay QSM B15 (Pre)	Perfluorobutanoic acid (PFBA)	J	0.047	ug/Kg	0.042	1	375-22-4
800-BIOCHAR-3	PFAS Top Assay QSM B15 (Pre)	Perfluorobutanesulfonic acid (PFBS)	U	0.021	ug/Kg	0.021	1	375-73-5
800-BIOCHAR-3	PFAS Top Assay QSM B15 (Pre)	Perfluorodecanoic acid (PFDA)	U	0.042	ug/Kg	0.042	1	335-76-2
800-BIOCHAR-3	PFAS Top Assay QSM B15 (Pre)	Perfluorodecane sulfonic acid (PFDS)	U	0.031	ug/Kg	0.031	1	335-77-3
800-BIOCHAR-3	PFAS Top Assay QSM B15 (Pre)	Perfluorododecanoic acid (PFDoA)	U	0.021	ug/Kg	0.021	1	307-55-1
800-BIOCHAR-3	PFAS Top Assay QSM B15 (Pre)	Perfluoroheptanoic acid (PFHpA)	U	0.021	ug/Kg	0.021	1	375-85-9
800-BIOCHAR-3	PFAS Top Assay QSM B15 (Pre)	Perfluoroheptanesulfonic acid (PFHpS)	U	0.021	ug/Kg	0.021	1	375-92-8
800-BIOCHAR-3	PFAS Top Assay QSM B15 (Pre)	Perfluorohexanoic acid (PFHxA)	U	0.021	ug/Kg	0.021	1	307-24-4
800-BIOCHAR-3	PFAS Top Assay QSM B15 (Pre)	Perfluorohexanesulfonic acid (PFHxS)	U	0.031	ug/Kg	0.031	1	355-46-4
800-BIOCHAR-3	PFAS Top Assay QSM B15 (Pre)	Perfluorononanoic acid (PFNA)	U	0.021	ug/Kg	0.021	1	375-95-1
800-BIOCHAR-3	PFAS Top Assay QSM B15 (Pre)	Perfluorononanesulfonic acid (PFNS)	U	0.031	ug/Kg	0.031	1	68259-12-1
800-BIOCHAR-3	PFAS Top Assay QSM B15 (Pre)	Perfluorooctanoic acid (PFOA)	U	0.083	ug/Kg	0.083	1	335-67-1
800-BIOCHAR-3	PFAS Top Assay QSM B15 (Pre)	Perfluorooctanesulfonic acid (PFOS)	U	0.052	ug/Kg	0.052	1	1763-23-1
800-BIOCHAR-3	PFAS Top Assay QSM B15 (Pre)	Perfluorooctane Sulfonamide (FOSA)	U	0.021	ug/Kg	0.021	1	754-91-6
800-BIOCHAR-3	PFAS Top Assay QSM B15 (Pre)	Perfluoropentanoic acid (PFPeA)	U	0.021	ug/Kg	0.021	1	2706-90-3
800-BIOCHAR-3	PFAS Top Assay QSM B15 (Pre)	Perfluoropentanesulfonic acid (PFPeS)	U	0.021	ug/Kg	0.021	1	2706-91-4
800-BIOCHAR-3	PFAS Top Assay QSM B15 (Pre)	Perfluorotetradecanoic acid (PFTA)	U	0.021	ug/Kg	0.021	1	376-06-7
800-BIOCHAR-3	PFAS Top Assay QSM B15 (Pre)	Perfluorotridecanoic acid (PFTrDA)	U	0.031	ug/Kg	0.031	1	72629-94-8
800-BIOCHAR-3	PFAS Top Assay QSM B15 (Pre)	Perfluoroundecanoic acid (PFUnA)	U	0.021	ug/Kg	0.021	1	2058-94-8
650-BIOCHAR-1	PFAS Top Assay QSM B15 (Post)	11Cl-PF3OUdS	U	0.106	ug/Kg	0.106	5	763051-92-9
650-BIOCHAR-1	PFAS Top Assay QSM B15 (Post)	4:2 Fluorotelomer sulfonic acid (4:2 FTS)	U	0.265	ug/Kg	0.265	5	757124-72-4
650-BIOCHAR-1	PFAS Top Assay QSM B15 (Post)	6:2 Fluorotelomer sulfonic acid (6:2FTS)	U	0.318	ug/Kg	0.318	5	27619-97-2
650-BIOCHAR-1	PFAS Top Assay QSM B15 (Post)	8:2 Fluorotelomer sulfonic acid (8:2 FTS)	U	0.159	ug/Kg	0.159	5	39108-34-4
650-BIOCHAR-1	PFAS Top Assay QSM B15 (Post)	9Cl-PF3ONS	U	0.159	ug/Kg	0.159	5	756426-58-1
650-BIOCHAR-1	PFAS Top Assay QSM B15 (Post)	ADONA	U	0.053	ug/Kg	0.053	5	919005-14-4
650-BIOCHAR-1	PFAS Top Assay QSM B15 (Post)	Perfluoro-2-proxypropanoic acid (HFPO-DA)	U	0.741	ug/Kg	0.741	5	13252-13-6
650-BIOCHAR-1	PFAS Top Assay QSM B15 (Post)	NEtFOSAA	U	0.159	ug/Kg	0.159	5	2991-50-6
650-BIOCHAR-1	PFAS Top Assay QSM B15 (Post)	NMeFOSAA	U	0.106	ug/Kg	0.106	5	2355-31-9
650-BIOCHAR-1	PFAS Top Assay QSM B15 (Post)	Perfluorobutanoic acid (PFBA)	U	0.212	ug/Kg	0.212	5	375-22-4
650-BIOCHAR-1	PFAS Top Assay QSM B15 (Post)	Perfluorobutanesulfonic acid (PFBS)	U	0.106	ug/Kg	0.106	5	375-73-5
650-BIOCHAR-1	PFAS Top Assay QSM B15 (Post)	Perfluorodecanoic acid (PFDA)	U	0.212	ug/Kg	0.212	5	335-76-2
650-BIOCHAR-1	PFAS Top Assay QSM B15 (Post)	Perfluorodecane sulfonic acid (PFDS)	U	0.159	ug/Kg	0.159	5	335-77-3
650-BIOCHAR-1	PFAS Top Assay QSM B15 (Post)	Perfluorododecanoic acid (PFDoA)	U	0.106	ug/Kg	0.106	5	307-55-1
650-BIOCHAR-1	PFAS Top Assay QSM B15 (Post)	Perfluoroheptanoic acid (PFHpA)	U	0.106	ug/Kg	0.106	5	375-85-9
650-BIOCHAR-1	PFAS Top Assay QSM B15 (Post)	Perfluoroheptanesulfonic acid (PFHpS)	U	0.106	ug/Kg	0.106	5	375-92-8
650-BIOCHAR-1	PFAS Top Assay QSM B15 (Post)	Perfluorohexanoic acid (PFHxA)	U	0.106	ug/Kg	0.106	5	307-24-4
650-BIOCHAR-1	PFAS Top Assay QSM B15 (Post)	Perfluorohexanesulfonic acid (PFHxS)	U	0.159	ug/Kg	0.159	5	355-46-4
650-BIOCHAR-1	PFAS Top Assay QSM B15 (Post)	Perfluorononanoic acid (PFNA)	U	0.106	ug/Kg	0.106	5	375-95-1
650-BIOCHAR-1	PFAS Top Assay QSM B15 (Post)	Perfluorononanesulfonic acid (PFNS)	U	0.159	ug/Kg	0.159	5	68259-12-1
650-BIOCHAR-1	PFAS Top Assay QSM B15 (Post)	Perfluorooctanoic acid (PFOA)	U	0.423	ug/Kg	0.423	5	335-67-1
650-BIOCHAR-1	PFAS Top Assay QSM B15 (Post)	Perfluorooctanesulfonic acid (PFOS)	U	0.265	ug/Kg	0.265	5	1763-23-1
650-BIOCHAR-1	PFAS Top Assay QSM B15 (Post)	Perfluorooctane Sulfonamide (FOSA)	U	0.106	ug/Kg	0.106	5	754-91-6
650-BIOCHAR-1	PFAS Top Assay QSM B15 (Post)	Perfluoropentanoic acid (PFPeA)	U	0.106	ug/Kg	0.106	5	2706-90-3
650-BIOCHAR-1	PFAS Top Assay QSM B15 (Post)	Perfluoropentanesulfonic acid (PFPeS)	U	0.106	ug/Kg	0.106	5	2706-91-4
650-BIOCHAR-1	PFAS Top Assay QSM B15 (Post)	Perfluorotetradecanoic acid (PFTA)	U	0.106	ug/Kg	0.106	5	376-06-7
650-BIOCHAR-1	PFAS Top Assay QSM B15 (Post)	Perfluorotridecanoic acid (PFTrDA)	U	0.159	ug/Kg	0.159	5	72629-94-8
650-BIOCHAR-1	PFAS Top Assay QSM B15 (Post)	Perfluoroundecanoic acid (PFUnA)	U	0.106	ug/Kg	0.106	5	2058-94-8
650-BIOCHAR-1	PFAS Top Assay QSM B15 (Pre)	11Cl-PF3OUdS	U	0.101	ug/Kg	0.101	5	763051-92-9
650-BIOCHAR-1	PFAS Top Assay QSM B15 (Pre)	4:2 Fluorotelomer sulfonic acid (4:2 FTS)	U	0.253	ug/Kg	0.253	5	757124-72-4
650-BIOCHAR-1	PFAS Top Assay QSM B15 (Pre)	6:2 Fluorotelomer sulfonic acid (6:2FTS)	U	0.304	ug/Kg	0.304	5	27619-97-2
650-BIOCHAR-1	PFAS Top Assay QSM B15 (Pre)	8:2 Fluorotelomer sulfonic acid (8:2 FTS)	U	0.152	ug/Kg	0.152	5	39108-34-4
650-BIOCHAR-1	PFAS Top Assay QSM B15 (Pre)	9Cl-PF3ONS	U	0.152	ug/Kg	0.152	5	756426-58-1
650-BIOCHAR-1	PFAS Top Assay QSM B15 (Pre)	ADONA	U	0.051	ug/Kg	0.051	5	919005-14-4
650-BIOCHAR-1	PFAS Top Assay QSM B15 (Pre)	Perfluoro-2-proxypropanoic acid (HFPO-DA)	U	0.708	ug/Kg	0.708	5	13252-13-6
650-BIOCHAR-1	PFAS Top Assay QSM B15 (Pre)	NEtFOSAA	U	0.152	ug/Kg	0.152	5	2991-50-6
650-BIOCHAR-1	PFAS Top Assay QSM B15 (Pre)	NMeFOSAA	U	0.101	ug/Kg	0.101	5	2355-31-9
650-BIOCHAR-1	PFAS Top Assay QSM B15 (Pre)	Perfluorobutanoic acid (PFBA)	U	0.202	ug/Kg	0.202	5	375-22-4
650-BIOCHAR-1	PFAS Top Assay QSM B15 (Pre)	Perfluorobutanesulfonic acid (PFBS)	U	0.101	ug/Kg	0.101	5	375-73-5
650-BIOCHAR-1	PFAS Top Assay QSM B15 (Pre)	Perfluorodecanoic acid (PFDA)	U	0.202	ug/Kg	0.202	5	335-76-2
650-BIOCHAR-1	PFAS Top Assay QSM B15 (Pre)	Perfluorodecane sulfonic acid (PFDS)	U	0.152	ug/Kg	0.152	5	335-77-3
650-BIOCHAR-1	PFAS Top Assay QSM B15 (Pre)	Perfluorododecanoic acid (PFDoA)	U	0.101	ug/Kg	0.101	5	307-55-1
650-BIOCHAR-1	PFAS Top Assay QSM B15 (Pre)	Perfluoroheptanoic acid (PFHpA)	U	0.101	ug/Kg	0.101	5	375-85-9
650-BIOCHAR-1	PFAS Top Assay QSM B15 (Pre)	Perfluoroheptanesulfonic acid (PFHpS)	U	0.101	ug/Kg	0.101	5	375-92-8
650-BIOCHAR-1	PFAS Top Assay QSM B15 (Pre)	Perfluorohexanoic acid (PFHxA)	U	0.101	ug/Kg	0.101	5	307-24-4
650-BIOCHAR-1	PFAS Top Assay QSM B15 (Pre)	Perfluorohexanesulfonic acid (PFHxS)	U	0.152	ug/Kg	0.152	5	355-46-4
650-BIOCHAR-1	PFAS Top Assay QSM B15 (Pre)	Perfluorononanoic acid (PFNA)	U	0.101	ug/Kg	0.101	5	375-95-1
650-BIOCHAR-1	PFAS Top Assay QSM B15 (Pre)	Perfluorononanesulfonic acid (PFNS)	U	0.152	ug/Kg	0.152	5	68259-12-1
650-BIOCHAR-1	PFAS Top Assay QSM B15 (Pre)	Perfluorooctanoic acid (PFOA)	U	0.405	ug/Kg	0.405	5	335-67-1
650-BIOCHAR-1	PFAS Top Assay QSM B15 (Pre)	Perfluorooctanesulfonic acid (PFOS)	U	0.253	ug/Kg	0.253	5	1763-23-1
650-BIOCHAR-1	PFAS Top Assay QSM B15 (Pre)	Perfluorooctane Sulfonamide (FOSA)	U	0.101	ug/Kg	0.101	5	754-91-6
650-BIOCHAR-1	PFAS Top Assay QSM B15 (Pre)	Perfluoropentanoic acid (PFPeA)	U	0.101	ug/Kg	0.101	5	2706-90-3
650-BIOCHAR-1	PFAS Top Assay QSM B15 (Pre)	Perfluoropentanesulfonic acid (PFPeS)	U	0.101	ug/Kg	0.101	5	2706-91-4
650-BIOCHAR-1	PFAS Top Assay QSM B15 (Pre)	Perfluorotetradecanoic acid (PFTA)	U	0.101	ug/Kg	0.101	5	376-06-7
650-BIOCHAR-1	PFAS Top Assay QSM B15 (Pre)	Perfluorotridecanoic acid (PFTrDA)	U	0.152	ug/Kg	0.152	5	72629-94-8
650-BIOCHAR-1	PFAS Top Assay QSM B15 (Pre)	Perfluoroundecanoic acid (PFUnA)	U	0.101	ug/Kg	0.101	5	2058-94-8
650-BIOCHAR-2	PFAS Top Assay QSM B15 (Post)	11Cl-PF3OUdS	U	0.019	ug/Kg	0.019	1	763051-92-9
650-BIOCHAR-2	PFAS Top Assay QSM B15 (Post)	4:2 Fluorotelomer sulfonic acid (4:2 FTS)	U	0.048	ug/Kg	0.048	1	757124-72-4
650-BIOCHAR-2	PFAS Top Assay QSM B15 (Post)	6:2 Fluorotelomer sulfonic acid (6:2FTS)	U	0.057	ug/Kg	0.057	1	27619-97-2
650-BIOCHAR-2	PFAS Top Assay QSM B15 (Post)	8:2 Fluorotelomer sulfonic acid (8:2 FTS)	U	0.029	ug/Kg	0.029	1	39108-34-4
650-BIOCHAR-2	PFAS Top Assay QSM B15 (Post)	9Cl-PF3ONS	U	0.029	ug/Kg	0.029	1	756426-58-1
650-BIOCHAR-2	PFAS Top Assay QSM B15 (Post)	ADONA	U	0.00954	ug/Kg	0.00954	1	919005-14-4
650-BIOCHAR-2	PFAS Top Assay QSM B15 (Post)	Perfluoro-2-proxypropanoic acid (HFPO-DA)	U	0.134	ug/Kg	0.134	1	13252-13-6
650-BIOCHAR-2	PFAS Top Assay QSM B15 (Post)	NEtFOSAA	U	0.029	ug/Kg	0.029	1	2991-50-6
650-BIOCHAR-2	PFAS Top Assay QSM B15 (Post)	NMeFOSAA	U	0.019	ug/Kg	0.019	1	2355-31-9
650-BIOCHAR-2	PFAS Top Assay QSM B15 (Post)	Perfluorobutanoic acid (PFBA)	U	0.038	ug/Kg	0.038	1	375-22-4
650-BIOCHAR-2	PFAS Top Assay QSM B15 (Post)	Perfluorobutanesulfonic acid (PFBS)	U	0.019	ug/Kg	0.019	1	375-73-5
650-BIOCHAR-2	PFAS Top Assay QSM B15 (Post)	Perfluorodecanoic acid (PFDA)	U	0.038	ug/Kg	0.038	1	335-76-2
650-BIOCHAR-2	PFAS Top Assay QSM B15 (Post)	Perfluorodecane sulfonic acid (PFDS)	U	0.029	ug/Kg	0.029	1	335-77-3
650-BIOCHAR-2	PFAS Top Assay QSM B15 (Post)	Perfluorododecanoic acid (PFDoA)	U	0.019	ug/Kg	0.019	1	307-55-1
650-BIOCHAR-2	PFAS Top Assay QSM B15 (Post)	Perfluoroheptanoic acid (PFHpA)	U	0.019	ug/Kg	0.019	1	375-85-9
650-BIOCHAR-2	PFAS Top Assay QSM B15 (Post)	Perfluoroheptanesulfonic acid (PFHpS)	U	0.019	ug/Kg	0.019	1	375-92-8
650-BIOCHAR-2	PFAS Top Assay QSM B15 (Post)	Perfluorohexanoic acid (PFHxA)	U	0.019	ug/Kg	0.019	1	307-24-4
650-BIOCHAR-2	PFAS Top Assay QSM B15 (Post)	Perfluorohexanesulfonic acid (PFHxS)	U	0.029	ug/Kg	0.029	1	355-46-4
650-BIOCHAR-2	PFAS Top Assay QSM B15 (Post)	Perfluorononanoic acid (PFNA)	U	0.019	ug/Kg	0.019	1	375-95-1
650-BIOCHAR-2	PFAS Top Assay QSM B15 (Post)	Perfluorononanesulfonic acid (PFNS)	U	0.029	ug/Kg	0.029	1	68259-12-1
650-BIOCHAR-2	PFAS Top Assay QSM B15 (Post)	Perfluorooctanoic acid (PFOA)	U	0.076	ug/Kg	0.076	1	335-67-1
650-BIOCHAR-2	PFAS Top Assay QSM B15 (Post)	Perfluorooctanesulfonic acid (PFOS)	U	0.048	ug/Kg	0.048	1	1763-23-1
650-BIOCHAR-2	PFAS Top Assay QSM B15 (Post)	Perfluorooctane Sulfonamide (FOSA)	U	0.019	ug/Kg	0.019	1	754-91-6
650-BIOCHAR-2	PFAS Top Assay QSM B15 (Post)	Perfluoropentanoic acid (PFPeA)	J	0.029	ug/Kg	0.019	1	2706-90-3
650-BIOCHAR-2	PFAS Top Assay QSM B15 (Post)	Perfluoropentanesulfonic acid (PFPeS)	U	0.019	ug/Kg	0.019	1	2706-91-4
650-BIOCHAR-2	PFAS Top Assay QSM B15 (Post)	Perfluorotetradecanoic acid (PFTA)	U	0.019	ug/Kg	0.019	1	376-06-7
650-BIOCHAR-2	PFAS Top Assay QSM B15 (Post)	Perfluorotridecanoic acid (PFTrDA)	U	0.029	ug/Kg	0.029	1	72629-94-8
650-BIOCHAR-2	PFAS Top Assay QSM B15 (Post)	Perfluoroundecanoic acid (PFUnA)	U	0.019	ug/Kg	0.019	1	2058-94-8
650-BIOCHAR-2	PFAS Top Assay QSM B15 (Pre)	11Cl-PF3OUdS	U	0.019	ug/Kg	0.019	1	763051-92-9
650-BIOCHAR-2	PFAS Top Assay QSM B15 (Pre)	4:2 Fluorotelomer sulfonic acid (4:2 FTS)	U	0.049	ug/Kg	0.049	1	757124-72-4
650-BIOCHAR-2	PFAS Top Assay QSM B15 (Pre)	6:2 Fluorotelomer sulfonic acid (6:2FTS)	U	0.058	ug/Kg	0.058	1	27619-97-2
650-BIOCHAR-2	PFAS Top Assay QSM B15 (Pre)	8:2 Fluorotelomer sulfonic acid (8:2 FTS)	U	0.029	ug/Kg	0.029	1	39108-34-4
650-BIOCHAR-2	PFAS Top Assay QSM B15 (Pre)	9Cl-PF3ONS	U	0.029	ug/Kg	0.029	1	756426-58-1
650-BIOCHAR-2	PFAS Top Assay QSM B15 (Pre)	ADONA	U	0.00972	ug/Kg	0.00972	1	919005-14-4
650-BIOCHAR-2	PFAS Top Assay QSM B15 (Pre)	Perfluoro-2-proxypropanoic acid (HFPO-DA)	U	0.136	ug/Kg	0.136	1	13252-13-6
650-BIOCHAR-2	PFAS Top Assay QSM B15 (Pre)	NEtFOSAA	U	0.029	ug/Kg	0.029	1	2991-50-6
650-BIOCHAR-2	PFAS Top Assay QSM B15 (Pre)	NMeFOSAA	U	0.019	ug/Kg	0.019	1	2355-31-9
650-BIOCHAR-2	PFAS Top Assay QSM B15 (Pre)	Perfluorobutanoic acid (PFBA)	U	0.039	ug/Kg	0.039	1	375-22-4
650-BIOCHAR-2	PFAS Top Assay QSM B15 (Pre)	Perfluorobutanesulfonic acid (PFBS)	U	0.019	ug/Kg	0.019	1	375-73-5
650-BIOCHAR-2	PFAS Top Assay QSM B15 (Pre)	Perfluorodecanoic acid (PFDA)	U	0.039	ug/Kg	0.039	1	335-76-2
650-BIOCHAR-2	PFAS Top Assay QSM B15 (Pre)	Perfluorodecane sulfonic acid (PFDS)	U	0.029	ug/Kg	0.029	1	335-77-3
650-BIOCHAR-2	PFAS Top Assay QSM B15 (Pre)	Perfluorododecanoic acid (PFDoA)	U	0.019	ug/Kg	0.019	1	307-55-1
650-BIOCHAR-2	PFAS Top Assay QSM B15 (Pre)	Perfluoroheptanoic acid (PFHpA)	U	0.019	ug/Kg	0.019	1	375-85-9
650-BIOCHAR-2	PFAS Top Assay QSM B15 (Pre)	Perfluoroheptanesulfonic acid (PFHpS)	U	0.019	ug/Kg	0.019	1	375-92-8
650-BIOCHAR-2	PFAS Top Assay QSM B15 (Pre)	Perfluorohexanoic acid (PFHxA)	U	0.019	ug/Kg	0.019	1	307-24-4
650-BIOCHAR-2	PFAS Top Assay QSM B15 (Pre)	Perfluorohexanesulfonic acid (PFHxS)	U	0.029	ug/Kg	0.029	1	355-46-4
650-BIOCHAR-2	PFAS Top Assay QSM B15 (Pre)	Perfluorononanoic acid (PFNA)	U	0.019	ug/Kg	0.019	1	375-95-1
650-BIOCHAR-2	PFAS Top Assay QSM B15 (Pre)	Perfluorononanesulfonic acid (PFNS)	U	0.029	ug/Kg	0.029	1	68259-12-1
650-BIOCHAR-2	PFAS Top Assay QSM B15 (Pre)	Perfluorooctanoic acid (PFOA)	U	0.078	ug/Kg	0.078	1	335-67-1
650-BIOCHAR-2	PFAS Top Assay QSM B15 (Pre)	Perfluorooctanesulfonic acid (PFOS)	U	0.049	ug/Kg	0.049	1	1763-23-1
650-BIOCHAR-2	PFAS Top Assay QSM B15 (Pre)	Perfluorooctane Sulfonamide (FOSA)	U	0.019	ug/Kg	0.019	1	754-91-6
650-BIOCHAR-2	PFAS Top Assay QSM B15 (Pre)	Perfluoropentanoic acid (PFPeA)	U	0.019	ug/Kg	0.019	1	2706-90-3
650-BIOCHAR-2	PFAS Top Assay QSM B15 (Pre)	Perfluoropentanesulfonic acid (PFPeS)	U	0.019	ug/Kg	0.019	1	2706-91-4
650-BIOCHAR-2	PFAS Top Assay QSM B15 (Pre)	Perfluorotetradecanoic acid (PFTA)	U	0.019	ug/Kg	0.019	1	376-06-7
650-BIOCHAR-2	PFAS Top Assay QSM B15 (Pre)	Perfluorotridecanoic acid (PFTrDA)	U	0.029	ug/Kg	0.029	1	72629-94-8
650-BIOCHAR-2	PFAS Top Assay QSM B15 (Pre)	Perfluoroundecanoic acid (PFUnA)	U	0.019	ug/Kg	0.019	1	2058-94-8
650-BIOCHAR-3	PFAS Top Assay QSM B15 (Post)	11Cl-PF3OUdS	U	0.019	ug/Kg	0.019	1	763051-92-9
650-BIOCHAR-3	PFAS Top Assay QSM B15 (Post)	4:2 Fluorotelomer sulfonic acid (4:2 FTS)	U	0.048	ug/Kg	0.048	1	757124-72-4
650-BIOCHAR-3	PFAS Top Assay QSM B15 (Post)	6:2 Fluorotelomer sulfonic acid (6:2FTS)	U	0.057	ug/Kg	0.057	1	27619-97-2
650-BIOCHAR-3	PFAS Top Assay QSM B15 (Post)	8:2 Fluorotelomer sulfonic acid (8:2 FTS)	U	0.029	ug/Kg	0.029	1	39108-34-4
650-BIOCHAR-3	PFAS Top Assay QSM B15 (Post)	9Cl-PF3ONS	U	0.029	ug/Kg	0.029	1	756426-58-1
650-BIOCHAR-3	PFAS Top Assay QSM B15 (Post)	ADONA	U	0.00957	ug/Kg	0.00957	1	919005-14-4
650-BIOCHAR-3	PFAS Top Assay QSM B15 (Post)	Perfluoro-2-proxypropanoic acid (HFPO-DA)	U	0.134	ug/Kg	0.134	1	13252-13-6
650-BIOCHAR-3	PFAS Top Assay QSM B15 (Post)	NEtFOSAA	U	0.029	ug/Kg	0.029	1	2991-50-6
650-BIOCHAR-3	PFAS Top Assay QSM B15 (Post)	NMeFOSAA	U	0.019	ug/Kg	0.019	1	2355-31-9
650-BIOCHAR-3	PFAS Top Assay QSM B15 (Post)	Perfluorobutanoic acid (PFBA)	U	0.038	ug/Kg	0.038	1	375-22-4
650-BIOCHAR-3	PFAS Top Assay QSM B15 (Post)	Perfluorobutanesulfonic acid (PFBS)	U	0.019	ug/Kg	0.019	1	375-73-5
650-BIOCHAR-3	PFAS Top Assay QSM B15 (Post)	Perfluorodecanoic acid (PFDA)	U	0.038	ug/Kg	0.038	1	335-76-2
650-BIOCHAR-3	PFAS Top Assay QSM B15 (Post)	Perfluorodecane sulfonic acid (PFDS)	U	0.029	ug/Kg	0.029	1	335-77-3
650-BIOCHAR-3	PFAS Top Assay QSM B15 (Post)	Perfluorododecanoic acid (PFDoA)	U	0.019	ug/Kg	0.019	1	307-55-1
650-BIOCHAR-3	PFAS Top Assay QSM B15 (Post)	Perfluoroheptanoic acid (PFHpA)	U	0.019	ug/Kg	0.019	1	375-85-9
650-BIOCHAR-3	PFAS Top Assay QSM B15 (Post)	Perfluoroheptanesulfonic acid (PFHpS)	U	0.019	ug/Kg	0.019	1	375-92-8
650-BIOCHAR-3	PFAS Top Assay QSM B15 (Post)	Perfluorohexanoic acid (PFHxA)	U	0.019	ug/Kg	0.019	1	307-24-4
650-BIOCHAR-3	PFAS Top Assay QSM B15 (Post)	Perfluorohexanesulfonic acid (PFHxS)	U	0.029	ug/Kg	0.029	1	355-46-4
650-BIOCHAR-3	PFAS Top Assay QSM B15 (Post)	Perfluorononanoic acid (PFNA)	U	0.019	ug/Kg	0.019	1	375-95-1
650-BIOCHAR-3	PFAS Top Assay QSM B15 (Post)	Perfluorononanesulfonic acid (PFNS)	U	0.029	ug/Kg	0.029	1	68259-12-1
650-BIOCHAR-3	PFAS Top Assay QSM B15 (Post)	Perfluorooctanoic acid (PFOA)	U	0.077	ug/Kg	0.077	1	335-67-1
650-BIOCHAR-3	PFAS Top Assay QSM B15 (Post)	Perfluorooctanesulfonic acid (PFOS)	U	0.048	ug/Kg	0.048	1	1763-23-1
650-BIOCHAR-3	PFAS Top Assay QSM B15 (Post)	Perfluorooctane Sulfonamide (FOSA)	U	0.019	ug/Kg	0.019	1	754-91-6
650-BIOCHAR-3	PFAS Top Assay QSM B15 (Post)	Perfluoropentanoic acid (PFPeA)	J	0.022	ug/Kg	0.019	1	2706-90-3
650-BIOCHAR-3	PFAS Top Assay QSM B15 (Post)	Perfluoropentanesulfonic acid (PFPeS)	U	0.019	ug/Kg	0.019	1	2706-91-4
650-BIOCHAR-3	PFAS Top Assay QSM B15 (Post)	Perfluorotetradecanoic acid (PFTA)	U	0.019	ug/Kg	0.019	1	376-06-7
650-BIOCHAR-3	PFAS Top Assay QSM B15 (Post)	Perfluorotridecanoic acid (PFTrDA)	U	0.029	ug/Kg	0.029	1	72629-94-8
650-BIOCHAR-3	PFAS Top Assay QSM B15 (Post)	Perfluoroundecanoic acid (PFUnA)	U	0.019	ug/Kg	0.019	1	2058-94-8
650-BIOCHAR-3	PFAS Top Assay QSM B15 (Pre)	11Cl-PF3OUdS	U	0.02	ug/Kg	0.02	1	763051-92-9
650-BIOCHAR-3	PFAS Top Assay QSM B15 (Pre)	4:2 Fluorotelomer sulfonic acid (4:2 FTS)	U	0.05	ug/Kg	0.05	1	757124-72-4
650-BIOCHAR-3	PFAS Top Assay QSM B15 (Pre)	6:2 Fluorotelomer sulfonic acid (6:2FTS)	U	0.059	ug/Kg	0.059	1	27619-97-2
650-BIOCHAR-3	PFAS Top Assay QSM B15 (Pre)	8:2 Fluorotelomer sulfonic acid (8:2 FTS)	U	0.03	ug/Kg	0.03	1	39108-34-4
650-BIOCHAR-3	PFAS Top Assay QSM B15 (Pre)	9Cl-PF3ONS	U	0.03	ug/Kg	0.03	1	756426-58-1
650-BIOCHAR-3	PFAS Top Assay QSM B15 (Pre)	ADONA	U	0.00991	ug/Kg	0.00991	1	919005-14-4
650-BIOCHAR-3	PFAS Top Assay QSM B15 (Pre)	Perfluoro-2-proxypropanoic acid (HFPO-DA)	U	0.139	ug/Kg	0.139	1	13252-13-6
650-BIOCHAR-3	PFAS Top Assay QSM B15 (Pre)	NEtFOSAA	U	0.03	ug/Kg	0.03	1	2991-50-6
650-BIOCHAR-3	PFAS Top Assay QSM B15 (Pre)	NMeFOSAA	U	0.02	ug/Kg	0.02	1	2355-31-9
650-BIOCHAR-3	PFAS Top Assay QSM B15 (Pre)	Perfluorobutanoic acid (PFBA)	U	0.04	ug/Kg	0.04	1	375-22-4
650-BIOCHAR-3	PFAS Top Assay QSM B15 (Pre)	Perfluorobutanesulfonic acid (PFBS)	U	0.02	ug/Kg	0.02	1	375-73-5
650-BIOCHAR-3	PFAS Top Assay QSM B15 (Pre)	Perfluorodecanoic acid (PFDA)	U	0.04	ug/Kg	0.04	1	335-76-2
650-BIOCHAR-3	PFAS Top Assay QSM B15 (Pre)	Perfluorodecane sulfonic acid (PFDS)	U	0.03	ug/Kg	0.03	1	335-77-3
650-BIOCHAR-3	PFAS Top Assay QSM B15 (Pre)	Perfluorododecanoic acid (PFDoA)	U	0.02	ug/Kg	0.02	1	307-55-1
650-BIOCHAR-3	PFAS Top Assay QSM B15 (Pre)	Perfluoroheptanoic acid (PFHpA)	U	0.02	ug/Kg	0.02	1	375-85-9
650-BIOCHAR-3	PFAS Top Assay QSM B15 (Pre)	Perfluoroheptanesulfonic acid (PFHpS)	U	0.02	ug/Kg	0.02	1	375-92-8
650-BIOCHAR-3	PFAS Top Assay QSM B15 (Pre)	Perfluorohexanoic acid (PFHxA)	U	0.02	ug/Kg	0.02	1	307-24-4
650-BIOCHAR-3	PFAS Top Assay QSM B15 (Pre)	Perfluorohexanesulfonic acid (PFHxS)	U	0.03	ug/Kg	0.03	1	355-46-4
650-BIOCHAR-3	PFAS Top Assay QSM B15 (Pre)	Perfluorononanoic acid (PFNA)	U	0.02	ug/Kg	0.02	1	375-95-1
650-BIOCHAR-3	PFAS Top Assay QSM B15 (Pre)	Perfluorononanesulfonic acid (PFNS)	U	0.03	ug/Kg	0.03	1	68259-12-1
650-BIOCHAR-3	PFAS Top Assay QSM B15 (Pre)	Perfluorooctanoic acid (PFOA)	U	0.079	ug/Kg	0.079	1	335-67-1
650-BIOCHAR-3	PFAS Top Assay QSM B15 (Pre)	Perfluorooctanesulfonic acid (PFOS)	U	0.05	ug/Kg	0.05	1	1763-23-1
650-BIOCHAR-3	PFAS Top Assay QSM B15 (Pre)	Perfluorooctane Sulfonamide (FOSA)	U	0.02	ug/Kg	0.02	1	754-91-6
650-BIOCHAR-3	PFAS Top Assay QSM B15 (Pre)	Perfluoropentanoic acid (PFPeA)	U	0.02	ug/Kg	0.02	1	2706-90-3
650-BIOCHAR-3	PFAS Top Assay QSM B15 (Pre)	Perfluoropentanesulfonic acid (PFPeS)	U	0.02	ug/Kg	0.02	1	2706-91-4
650-BIOCHAR-3	PFAS Top Assay QSM B15 (Pre)	Perfluorotetradecanoic acid (PFTA)	U	0.02	ug/Kg	0.02	1	376-06-7
650-BIOCHAR-3	PFAS Top Assay QSM B15 (Pre)	Perfluorotridecanoic acid (PFTrDA)	U	0.03	ug/Kg	0.03	1	72629-94-8
650-BIOCHAR-3	PFAS Top Assay QSM B15 (Pre)	Perfluoroundecanoic acid (PFUnA)	U	0.02	ug/Kg	0.02	1	2058-94-8

## Sheet: FIltered to Remove NDs (U)
Sample_ID	Analytical_Method	Parameter	Laboratory_Qualifiers	Result	Unit	Detection_Limit	CAS
650-BIOCHAR-2	PFAS Top Assay QSM B15 (Post)	Perfluoropentanoic acid (PFPeA)	J	0.029	ug/Kg	0.019	2706-90-3
650-BIOCHAR-3	PFAS Top Assay QSM B15 (Post)	Perfluoropentanoic acid (PFPeA)	J	0.022	ug/Kg	0.019	2706-90-3
800-BIOCHAR-1	PFAS Top Assay QSM B15 (Post)	Perfluoropentanoic acid (PFPeA)	J	0.02	ug/Kg	0.019	2706-90-3
800-BIOCHAR-3	PFAS Top Assay QSM B15 (Post)	Perfluoropentanoic acid (PFPeA)	J	0.021	ug/Kg	0.021	2706-90-3
800-BIOCHAR-3	PFAS Top Assay QSM B15 (Pre)	Perfluorobutanoic acid (PFBA)	J	0.047	ug/Kg	0.042	375-22-4
MIL-FEED-1	PFAS Top Assay QSM B15 (Post)	6:2 Fluorotelomer sulfonic acid (6:2FTS)	J	0.119	ug/Kg	0.063	27619-97-2
MIL-FEED-1	PFAS Top Assay QSM B15 (Post)	Perfluorobutanesulfonic acid (PFBS)	J	0.214	ug/Kg	0.021	375-73-5
MIL-FEED-1	PFAS Top Assay QSM B15 (Post)	Perfluorodecanoic acid (PFDA)	J	0.185	ug/Kg	0.042	335-76-2
MIL-FEED-1	PFAS Top Assay QSM B15 (Post)	Perfluorodecane sulfonic acid (PFDS)	J	0.074	ug/Kg	0.032	335-77-3
MIL-FEED-1	PFAS Top Assay QSM B15 (Post)	Perfluorododecanoic acid (PFDoA)	J	0.108	ug/Kg	0.021	307-55-1
MIL-FEED-1	PFAS Top Assay QSM B15 (Post)	Perfluoroheptanoic acid (PFHpA)	J	0.66	ug/Kg	0.021	375-85-9
MIL-FEED-1	PFAS Top Assay QSM B15 (Post)	Perfluorohexanesulfonic acid (PFHxS)	J	0.052	ug/Kg	0.032	355-46-4
MIL-FEED-1	PFAS Top Assay QSM B15 (Post)	Perfluorononanoic acid (PFNA)	J	0.243	ug/Kg	0.021	375-95-1
MIL-FEED-1	PFAS Top Assay QSM B15 (Post)	Perfluorooctanoic acid (PFOA)	J	0.635	ug/Kg	0.085	335-67-1
MIL-FEED-1	PFAS Top Assay QSM B15 (Post)	Perfluorooctane Sulfonamide (FOSA)	J	0.025	ug/Kg	0.021	754-91-6
MIL-FEED-1	PFAS Top Assay QSM B15 (Post)	Perfluorotetradecanoic acid (PFTA)	J	0.046	ug/Kg	0.021	376-06-7
MIL-FEED-1	PFAS Top Assay QSM B15 (Post)	Perfluoroundecanoic acid (PFUnA)	J	0.099	ug/Kg	0.021	2058-94-8
MIL-FEED-1	PFAS Top Assay QSM B15 (Post)	Perfluorobutanoic acid (PFBA)		5.01	ug/Kg	0.042	375-22-4
MIL-FEED-1	PFAS Top Assay QSM B15 (Post)	Perfluorohexanoic acid (PFHxA)		2.15	ug/Kg	0.021	307-24-4
MIL-FEED-1	PFAS Top Assay QSM B15 (Post)	Perfluorooctanesulfonic acid (PFOS)		1.3	ug/Kg	0.053	1763-23-1
MIL-FEED-1	PFAS Top Assay QSM B15 (Post)	Perfluoropentanoic acid (PFPeA)		5.43	ug/Kg	0.021	2706-90-3
MIL-FEED-1	PFAS Top Assay QSM B15 (Pre)	8:2 Fluorotelomer sulfonic acid (8:2 FTS)	J	0.067	ug/Kg	0.031	39108-34-4
MIL-FEED-1	PFAS Top Assay QSM B15 (Pre)	NEtFOSAA	J	0.262	ug/Kg	0.031	2991-50-6
MIL-FEED-1	PFAS Top Assay QSM B15 (Pre)	NMeFOSAA	J	0.382	ug/Kg	0.021	2355-31-9
MIL-FEED-1	PFAS Top Assay QSM B15 (Pre)	Perfluorobutanoic acid (PFBA)	J	0.142	ug/Kg	0.042	375-22-4
MIL-FEED-1	PFAS Top Assay QSM B15 (Pre)	Perfluorodecanoic acid (PFDA)	J	0.168	ug/Kg	0.042	335-76-2
MIL-FEED-1	PFAS Top Assay QSM B15 (Pre)	Perfluorodecane sulfonic acid (PFDS)	J	0.092	ug/Kg	0.031	335-77-3
MIL-FEED-1	PFAS Top Assay QSM B15 (Pre)	Perfluorododecanoic acid (PFDoA)	J	0.098	ug/Kg	0.021	307-55-1
MIL-FEED-1	PFAS Top Assay QSM B15 (Pre)	Perfluoroheptanoic acid (PFHpA)	J	0.039	ug/Kg	0.021	375-85-9
MIL-FEED-1	PFAS Top Assay QSM B15 (Pre)	Perfluoroheptanesulfonic acid (PFHpS)	J	0.095	ug/Kg	0.021	375-92-8
MIL-FEED-1	PFAS Top Assay QSM B15 (Pre)	Perfluorohexanesulfonic acid (PFHxS)	J	0.307	ug/Kg	0.031	355-46-4
MIL-FEED-1	PFAS Top Assay QSM B15 (Pre)	Perfluorononanoic acid (PFNA)	J	0.082	ug/Kg	0.021	375-95-1
MIL-FEED-1	PFAS Top Assay QSM B15 (Pre)	Perfluorooctanoic acid (PFOA)	J	0.129	ug/Kg	0.084	335-67-1
MIL-FEED-1	PFAS Top Assay QSM B15 (Pre)	Perfluorooctane Sulfonamide (FOSA)	J	0.059	ug/Kg	0.021	754-91-6
MIL-FEED-1	PFAS Top Assay QSM B15 (Pre)	Perfluoropentanoic acid (PFPeA)	J	0.262	ug/Kg	0.021	2706-90-3
MIL-FEED-1	PFAS Top Assay QSM B15 (Pre)	Perfluoropentanesulfonic acid (PFPeS)	J	0.486	ug/Kg	0.021	2706-91-4
MIL-FEED-1	PFAS Top Assay QSM B15 (Pre)	Perfluorotetradecanoic acid (PFTA)	J	0.034	ug/Kg	0.021	376-06-7
MIL-FEED-1	PFAS Top Assay QSM B15 (Pre)	Perfluoroundecanoic acid (PFUnA)	J	0.06	ug/Kg	0.021	2058-94-8
MIL-FEED-1	PFAS Top Assay QSM B15 (Pre)	6:2 Fluorotelomer sulfonic acid (6:2FTS)		1.06	ug/Kg	0.063	27619-97-2
MIL-FEED-1	PFAS Top Assay QSM B15 (Pre)	Perfluorohexanoic acid (PFHxA)		1.02	ug/Kg	0.021	307-24-4
MIL-FEED-1	PFAS Top Assay QSM B15 (Pre)	Perfluorooctanesulfonic acid (PFOS)		1.09	ug/Kg	0.052	1763-23-1
MIL-FEED-2	PFAS Top Assay QSM B15 (Post)	Perfluorobutanesulfonic acid (PFBS)	J	0.108	ug/Kg	0.02	375-73-5
MIL-FEED-2	PFAS Top Assay QSM B15 (Post)	Perfluorodecanoic acid (PFDA)	J	0.141	ug/Kg	0.04	335-76-2
MIL-FEED-2	PFAS Top Assay QSM B15 (Post)	Perfluorodecane sulfonic acid (PFDS)	J	0.046	ug/Kg	0.03	335-77-3
MIL-FEED-2	PFAS Top Assay QSM B15 (Post)	Perfluorododecanoic acid (PFDoA)	J	0.076	ug/Kg	0.02	307-55-1
MIL-FEED-2	PFAS Top Assay QSM B15 (Post)	Perfluoroheptanoic acid (PFHpA)	J	0.501	ug/Kg	0.02	375-85-9
MIL-FEED-2	PFAS Top Assay QSM B15 (Post)	Perfluorohexanesulfonic acid (PFHxS)	J	0.037	ug/Kg	0.03	355-46-4
MIL-FEED-2	PFAS Top Assay QSM B15 (Post)	Perfluorononanoic acid (PFNA)	J	0.216	ug/Kg	0.02	375-95-1
MIL-FEED-2	PFAS Top Assay QSM B15 (Post)	Perfluorooctanoic acid (PFOA)	J	0.531	ug/Kg	0.081	335-67-1
MIL-FEED-2	PFAS Top Assay QSM B15 (Post)	Perfluorooctanesulfonic acid (PFOS)	J	0.84	ug/Kg	0.05	1763-23-1
MIL-FEED-2	PFAS Top Assay QSM B15 (Post)	Perfluorotetradecanoic acid (PFTA)	J	0.033	ug/Kg	0.02	376-06-7
MIL-FEED-2	PFAS Top Assay QSM B15 (Post)	Perfluoroundecanoic acid (PFUnA)	J	0.082	ug/Kg	0.02	2058-94-8
MIL-FEED-2	PFAS Top Assay QSM B15 (Post)	Perfluorobutanoic acid (PFBA)		3.69	ug/Kg	0.04	375-22-4
MIL-FEED-2	PFAS Top Assay QSM B15 (Post)	Perfluorohexanoic acid (PFHxA)		1.64	ug/Kg	0.02	307-24-4
MIL-FEED-2	PFAS Top Assay QSM B15 (Post)	Perfluoropentanoic acid (PFPeA)		3.74	ug/Kg	0.02	2706-90-3
MIL-FEED-2	PFAS Top Assay QSM B15 (Pre)	6:2 Fluorotelomer sulfonic acid (6:2FTS)	J	0.674	ug/Kg	0.062	27619-97-2
MIL-FEED-2	PFAS Top Assay QSM B15 (Pre)	8:2 Fluorotelomer sulfonic acid (8:2 FTS)	J	0.046	ug/Kg	0.031	39108-34-4
MIL-FEED-2	PFAS Top Assay QSM B15 (Pre)	NEtFOSAA	J	0.172	ug/Kg	0.031	2991-50-6
MIL-FEED-2	PFAS Top Assay QSM B15 (Pre)	NMeFOSAA	J	0.249	ug/Kg	0.021	2355-31-9
MIL-FEED-2	PFAS Top Assay QSM B15 (Pre)	Perfluorobutanoic acid (PFBA)	J	0.148	ug/Kg	0.042	375-22-4
MIL-FEED-2	PFAS Top Assay QSM B15 (Pre)	Perfluorodecanoic acid (PFDA)	J	0.112	ug/Kg	0.042	335-76-2
MIL-FEED-2	PFAS Top Assay QSM B15 (Pre)	Perfluorododecanoic acid (PFDoA)	J	0.096	ug/Kg	0.021	307-55-1
MIL-FEED-2	PFAS Top Assay QSM B15 (Pre)	Perfluoroheptanoic acid (PFHpA)	J	0.07	ug/Kg	0.021	375-85-9
MIL-FEED-2	PFAS Top Assay QSM B15 (Pre)	Perfluoroheptanesulfonic acid (PFHpS)	J	0.05	ug/Kg	0.021	375-92-8
MIL-FEED-2	PFAS Top Assay QSM B15 (Pre)	Perfluorohexanoic acid (PFHxA)	J	0.747	ug/Kg	0.021	307-24-4
MIL-FEED-2	PFAS Top Assay QSM B15 (Pre)	Perfluorohexanesulfonic acid (PFHxS)	J	0.279	ug/Kg	0.031	355-46-4
MIL-FEED-2	PFAS Top Assay QSM B15 (Pre)	Perfluorononanoic acid (PFNA)	J	0.066	ug/Kg	0.021	375-95-1
MIL-FEED-2	PFAS Top Assay QSM B15 (Pre)	Perfluorooctanoic acid (PFOA)	J	0.18	ug/Kg	0.083	335-67-1
MIL-FEED-2	PFAS Top Assay QSM B15 (Pre)	Perfluorooctanesulfonic acid (PFOS)	J	0.315	ug/Kg	0.052	1763-23-1
MIL-FEED-2	PFAS Top Assay QSM B15 (Pre)	Perfluorooctane Sulfonamide (FOSA)	J	0.035	ug/Kg	0.021	754-91-6
MIL-FEED-2	PFAS Top Assay QSM B15 (Pre)	Perfluoropentanoic acid (PFPeA)	J	0.378	ug/Kg	0.021	2706-90-3
MIL-FEED-2	PFAS Top Assay QSM B15 (Pre)	Perfluoropentanesulfonic acid (PFPeS)	J	0.022	ug/Kg	0.021	2706-91-4
MIL-FEED-2	PFAS Top Assay QSM B15 (Pre)	Perfluorotetradecanoic acid (PFTA)	J	0.037	ug/Kg	0.021	376-06-7
MIL-FEED-2	PFAS Top Assay QSM B15 (Pre)	Perfluoroundecanoic acid (PFUnA)	J	0.053	ug/Kg	0.021	2058-94-8
MIL-FEED-3	PFAS Top Assay QSM B15 (Post)	Perfluorobutanesulfonic acid (PFBS)	J	0.056	ug/Kg	0.02	375-73-5
MIL-FEED-3	PFAS Top Assay QSM B15 (Post)	Perfluorodecanoic acid (PFDA)	J	0.098	ug/Kg	0.04	335-76-2
MIL-FEED-3	PFAS Top Assay QSM B15 (Post)	Perfluorododecanoic acid (PFDoA)	J	0.044	ug/Kg	0.02	307-55-1
MIL-FEED-3	PFAS Top Assay QSM B15 (Post)	Perfluoroheptanoic acid (PFHpA)	J	0.358	ug/Kg	0.02	375-85-9
MIL-FEED-3	PFAS Top Assay QSM B15 (Post)	Perfluorononanoic acid (PFNA)	J	0.14	ug/Kg	0.02	375-95-1
MIL-FEED-3	PFAS Top Assay QSM B15 (Post)	Perfluorooctanoic acid (PFOA)	J	0.35	ug/Kg	0.08	335-67-1
MIL-FEED-3	PFAS Top Assay QSM B15 (Post)	Perfluorooctanesulfonic acid (PFOS)	J	0.309	ug/Kg	0.05	1763-23-1
MIL-FEED-3	PFAS Top Assay QSM B15 (Post)	Perfluorotetradecanoic acid (PFTA)	J	0.024	ug/Kg	0.02	376-06-7
MIL-FEED-3	PFAS Top Assay QSM B15 (Post)	Perfluoroundecanoic acid (PFUnA)	J	0.055	ug/Kg	0.02	2058-94-8
MIL-FEED-3	PFAS Top Assay QSM B15 (Post)	Perfluorobutanoic acid (PFBA)		2.2	ug/Kg	0.04	375-22-4
MIL-FEED-3	PFAS Top Assay QSM B15 (Post)	Perfluorohexanoic acid (PFHxA)		0.954	ug/Kg	0.02	307-24-4
MIL-FEED-3	PFAS Top Assay QSM B15 (Post)	Perfluoropentanoic acid (PFPeA)		1.99	ug/Kg	0.02	2706-90-3
MIL-FEED-3	PFAS Top Assay QSM B15 (Pre)	6:2 Fluorotelomer sulfonic acid (6:2FTS)	J	0.93	ug/Kg	0.063	27619-97-2
MIL-FEED-3	PFAS Top Assay QSM B15 (Pre)	8:2 Fluorotelomer sulfonic acid (8:2 FTS)	J	0.068	ug/Kg	0.032	39108-34-4
MIL-FEED-3	PFAS Top Assay QSM B15 (Pre)	NEtFOSAA	J	0.225	ug/Kg	0.032	2991-50-6
MIL-FEED-3	PFAS Top Assay QSM B15 (Pre)	NMeFOSAA	J	0.314	ug/Kg	0.021	2355-31-9
MIL-FEED-3	PFAS Top Assay QSM B15 (Pre)	Perfluorobutanoic acid (PFBA)	J	0.516	ug/Kg	0.042	375-22-4
MIL-FEED-3	PFAS Top Assay QSM B15 (Pre)	Perfluorobutanesulfonic acid (PFBS)	J	0.046	ug/Kg	0.021	375-73-5
MIL-FEED-3	PFAS Top Assay QSM B15 (Pre)	Perfluorodecanoic acid (PFDA)	J	0.171	ug/Kg	0.042	335-76-2
MIL-FEED-3	PFAS Top Assay QSM B15 (Pre)	Perfluorododecanoic acid (PFDoA)	J	0.106	ug/Kg	0.021	307-55-1
MIL-FEED-3	PFAS Top Assay QSM B15 (Pre)	Perfluoroheptanoic acid (PFHpA)	J	0.23	ug/Kg	0.021	375-85-9
MIL-FEED-3	PFAS Top Assay QSM B15 (Pre)	Perfluoroheptanesulfonic acid (PFHpS)	J	0.081	ug/Kg	0.021	375-92-8
MIL-FEED-3	PFAS Top Assay QSM B15 (Pre)	Perfluorohexanesulfonic acid (PFHxS)	J	0.308	ug/Kg	0.032	355-46-4
MIL-FEED-3	PFAS Top Assay QSM B15 (Pre)	Perfluorononanoic acid (PFNA)	J	0.148	ug/Kg	0.021	375-95-1
MIL-FEED-3	PFAS Top Assay QSM B15 (Pre)	Perfluorononanesulfonic acid (PFNS)	J	0.038	ug/Kg	0.032	68259-12-1
MIL-FEED-3	PFAS Top Assay QSM B15 (Pre)	Perfluorooctanoic acid (PFOA)	J	0.206	ug/Kg	0.084	335-67-1
MIL-FEED-3	PFAS Top Assay QSM B15 (Pre)	Perfluorooctane Sulfonamide (FOSA)	J	0.05	ug/Kg	0.021	754-91-6
MIL-FEED-3	PFAS Top Assay QSM B15 (Pre)	Perfluoropentanoic acid (PFPeA)	J	0.833	ug/Kg	0.021	2706-90-3
MIL-FEED-3	PFAS Top Assay QSM B15 (Pre)	Perfluoropentanesulfonic acid (PFPeS)	J	0.067	ug/Kg	0.021	2706-91-4
MIL-FEED-3	PFAS Top Assay QSM B15 (Pre)	Perfluorotetradecanoic acid (PFTA)	J	0.036	ug/Kg	0.021	376-06-7
MIL-FEED-3	PFAS Top Assay QSM B15 (Pre)	Perfluoroundecanoic acid (PFUnA)	J	0.069	ug/Kg	0.021	2058-94-8
MIL-FEED-3	PFAS Top Assay QSM B15 (Pre)	Perfluorohexanoic acid (PFHxA)		1.13	ug/Kg	0.021	307-24-4
MIL-FEED-3	PFAS Top Assay QSM B15 (Pre)	Perfluorooctanesulfonic acid (PFOS)		1.25	ug/Kg	0.053	1763-23-1
