# Supplementary material for: Pyrolysis transports, and transforms, PFAS from biosolids to py-liquid
Source: Royal Society of Chemistry journal article supplement (doi:10.1039/d2ew00677d), 2022-12-16
Supplement: d2ew00677d3.xlsx [file d2ew00677d3.xlsx]

## Sheet: Sheet1
ClientSampleID	ListDescription	AnalyticalMethod	TestName	CASNumber	ReportedResult	ReportedLOQ	Qualifiers	Units	DilFact
Sand-Feed	PFAS by Isotope Dilution (36 analytes)	PFAS by ID SOP	9-chlorohexadecafluoro-3-oxanone-1-sulfonic acid (9Cl-PF3ONS)	756426-58-1	ND	1.7		ug/kg	1
Sand-Feed	PFAS by Isotope Dilution (36 analytes)	PFAS by ID SOP	11-chloroeicosafluoro-3-oxaundecane-1-sulfonic acid (11Cl-PF3OUdS	763051-92-9	ND	1.7		ug/kg	1
Sand-Feed	PFAS by Isotope Dilution (36 analytes)	PFAS by ID SOP	1H, 1H, 2H, 2H-perfluorodecane sulfonic acid (8:2 FTS)	39108-34-4	ND	1.7		ug/kg	1
Sand-Feed	PFAS by Isotope Dilution (36 analytes)	PFAS by ID SOP	1H, 1H, 2H, 2H-perfluorooctane sulfonic acid (6:2 FTS)	27619-97-2	ND	1.7		ug/kg	1
Sand-Feed	PFAS by Isotope Dilution (36 analytes)	PFAS by ID SOP	1H,1H,2H,2H-perfluorododecane sulfonic acid (10:2 FTS)	120226-60-0	ND	1.7		ug/kg	1
Sand-Feed	PFAS by Isotope Dilution (36 analytes)	PFAS by ID SOP	1H,1H,2H,2H-perfluorohexane sulfonic acid (4:2 FTS)	757124-72-4	ND	1.7		ug/kg	1
Sand-Feed	PFAS by Isotope Dilution (36 analytes)	PFAS by ID SOP	Hexafluoropropylene oxide dimer acid (GenX)	13252-13-6	ND	3.4		ug/kg	1
Sand-Feed	PFAS by Isotope Dilution (36 analytes)	PFAS by ID SOP	4,8-dioxa-3H-perfluorononanoic acid (ADONA)	919005-14-4	ND	1.7		ug/kg	1
Sand-Feed	PFAS by Isotope Dilution (36 analytes)	PFAS by ID SOP	N-ethylperfluoro-1-octanesulfonamide (EtFOSA)	4151-50-2	ND	1.7		ug/kg	1
Sand-Feed	PFAS by Isotope Dilution (36 analytes)	PFAS by ID SOP	N-ethylperfluoro-1-octanesulfonamidoacetic acid (EtFOSAA)	2991-50-6	ND	1.7		ug/kg	1
Sand-Feed	PFAS by Isotope Dilution (36 analytes)	PFAS by ID SOP	2-N-ethylperfluoro-1-octanesulfonamido-ethanol (EtFOSE)	1691-99-2	ND	1.7		ug/kg	1
Sand-Feed	PFAS by Isotope Dilution (36 analytes)	PFAS by ID SOP	N-methylperfluoro-1-octanesulfonamide (MeFOSA)	31506-32-8	ND	1.7		ug/kg	1
Sand-Feed	PFAS by Isotope Dilution (36 analytes)	PFAS by ID SOP	N-methylperfluoro-1-octanesulfonamidoacetic acid (MeFOSAA)	2355-31-9	ND	1.7		ug/kg	1
Sand-Feed	PFAS by Isotope Dilution (36 analytes)	PFAS by ID SOP	2-N-methylperfluoro-1-octanesulfonamido-ethanol (MeFOSE)	24448-09-7	ND	1.7		ug/kg	1
Sand-Feed	PFAS by Isotope Dilution (36 analytes)	PFAS by ID SOP	Perfluoro-1-butanesulfonic acid (PFBS)	375-73-5	ND	0.84		ug/kg	1
Sand-Feed	PFAS by Isotope Dilution (36 analytes)	PFAS by ID SOP	Perfluoro-1-decanesulfonic acid (PFDS)	335-77-3	ND	0.84		ug/kg	1
Sand-Feed	PFAS by Isotope Dilution (36 analytes)	PFAS by ID SOP	Perfluoro-1-heptanesulfonic acid (PFHpS)	375-92-8	ND	0.84		ug/kg	1
Sand-Feed	PFAS by Isotope Dilution (36 analytes)	PFAS by ID SOP	Perfluoro-1-nonanesulfonic acid (PFNS)	68259-12-1	ND	0.84		ug/kg	1
Sand-Feed	PFAS by Isotope Dilution (36 analytes)	PFAS by ID SOP	Perfluoro-1-octanesulfonamide (PFOSA)	754-91-6	ND	0.84		ug/kg	1
Sand-Feed	PFAS by Isotope Dilution (36 analytes)	PFAS by ID SOP	Perfluoro-1-pentanesulfonic acid (PFPeS)	2706-91-4	ND	0.84		ug/kg	1
Sand-Feed	PFAS by Isotope Dilution (36 analytes)	PFAS by ID SOP	Perfluorododecanesulfonic acid (PFDOS)	79780-39-5	ND	0.84		ug/kg	1
Sand-Feed	PFAS by Isotope Dilution (36 analytes)	PFAS by ID SOP	Perfluorohexanesulfonic acid (PFHxS)	355-46-4	ND	0.84		ug/kg	1
Sand-Feed	PFAS by Isotope Dilution (36 analytes)	PFAS by ID SOP	Perfluoro-n-butanoic acid (PFBA)	375-22-4	ND	0.84		ug/kg	1
Sand-Feed	PFAS by Isotope Dilution (36 analytes)	PFAS by ID SOP	Perfluoro-n-decanoic acid (PFDA)	335-76-2	ND	0.84		ug/kg	1
Sand-Feed	PFAS by Isotope Dilution (36 analytes)	PFAS by ID SOP	Perfluoro-n-dodecanoic acid (PFDoA)	307-55-1	ND	0.84		ug/kg	1
Sand-Feed	PFAS by Isotope Dilution (36 analytes)	PFAS by ID SOP	Perfluoro-n-heptanoic acid (PFHpA)	375-85-9	ND	0.84		ug/kg	1
Sand-Feed	PFAS by Isotope Dilution (36 analytes)	PFAS by ID SOP	Perfluoro-n-hexadecanoic acid (PFHxDA)	67905-19-5	ND	1.7		ug/kg	1
Sand-Feed	PFAS by Isotope Dilution (36 analytes)	PFAS by ID SOP	Perfluoro-n-hexanoic acid (PFHxA)	307-24-4	ND	0.84		ug/kg	1
Sand-Feed	PFAS by Isotope Dilution (36 analytes)	PFAS by ID SOP	Perfluoro-n-nonanoic acid (PFNA)	375-95-1	ND	0.84		ug/kg	1
Sand-Feed	PFAS by Isotope Dilution (36 analytes)	PFAS by ID SOP	Perfluoro-n-octadecanoic acid (PFODA)	16517-11-6	ND	0.84		ug/kg	1
Sand-Feed	PFAS by Isotope Dilution (36 analytes)	PFAS by ID SOP	Perfluoro-n-octanoic acid (PFOA)	335-67-1	ND	0.84		ug/kg	1
Sand-Feed	PFAS by Isotope Dilution (36 analytes)	PFAS by ID SOP	Perfluoro-n-pentanoic acid (PFPeA)	2706-90-3	ND	0.84		ug/kg	1
Sand-Feed	PFAS by Isotope Dilution (36 analytes)	PFAS by ID SOP	Perfluoro-n-tetradecanoic acid (PFTeDA)	376-06-7	ND	0.84		ug/kg	1
Sand-Feed	PFAS by Isotope Dilution (36 analytes)	PFAS by ID SOP	Perfluoro-n-tridecanoic acid (PFTrDA)	72629-94-8	ND	0.84		ug/kg	1
Sand-Feed	PFAS by Isotope Dilution (36 analytes)	PFAS by ID SOP	Perfluoro-n-undecanoic acid (PFUdA)	2058-94-8	ND	0.84		ug/kg	1
Sand-Feed	PFAS by Isotope Dilution (36 analytes)	PFAS by ID SOP	Perfluorooctanesulfonic acid (PFOS)	1763-23-1	ND	0.84		ug/kg	1
Sand-Feed	PFAS by Isotope Dilution (36 analytes)	PFAS by ID SOP	13C2_4:2FTS	SESI-0104	115	25-150		%	1
Sand-Feed	PFAS by Isotope Dilution (36 analytes)	PFAS by ID SOP	13C2_6:2FTS	SESI-0105	119	25-150		%	1
Sand-Feed	PFAS by Isotope Dilution (36 analytes)	PFAS by ID SOP	13C2_8:2FTS	SESI-0106	109	25-150		%	1
Sand-Feed	PFAS by Isotope Dilution (36 analytes)	PFAS by ID SOP	13C2_PFDoA	SESI-0118	105	25-150		%	1
Sand-Feed	PFAS by Isotope Dilution (36 analytes)	PFAS by ID SOP	13C2_PFHxDA	SESI-0103	115	25-150		%	1
Sand-Feed	PFAS by Isotope Dilution (36 analytes)	PFAS by ID SOP	13C2_PFTeDA	SESI-0119	104	25-150		%	1
Sand-Feed	PFAS by Isotope Dilution (36 analytes)	PFAS by ID SOP	13C3_PFBS	SESI-0116	107	25-150		%	1
Sand-Feed	PFAS by Isotope Dilution (36 analytes)	PFAS by ID SOP	13C3_PFHxS	SESI-0096	95	25-150		%	1
Sand-Feed	PFAS by Isotope Dilution (36 analytes)	PFAS by ID SOP	13C3-HFPO-DA	SESI-0121	112	25-150		%	1
Sand-Feed	PFAS by Isotope Dilution (36 analytes)	PFAS by ID SOP	13C4_PFBA	SESI-0111	99	25-150		%	1
Sand-Feed	PFAS by Isotope Dilution (36 analytes)	PFAS by ID SOP	13C4_PFHpA	SESI-0114	94	25-150		%	1
Sand-Feed	PFAS by Isotope Dilution (36 analytes)	PFAS by ID SOP	13C5_PFHxA	SESI-0113	105	25-150		%	1
Sand-Feed	PFAS by Isotope Dilution (36 analytes)	PFAS by ID SOP	13C5_PFPeA	SESI-0112	98	25-150		%	1
Sand-Feed	PFAS by Isotope Dilution (36 analytes)	PFAS by ID SOP	13C6_PFDA	SESI-0115	97	25-150		%	1
Sand-Feed	PFAS by Isotope Dilution (36 analytes)	PFAS by ID SOP	13C7_PFUdA	SESI-0117	103	25-150		%	1
Sand-Feed	PFAS by Isotope Dilution (36 analytes)	PFAS by ID SOP	13C8_PFOA	SESI-0097	106	25-150		%	1
Sand-Feed	PFAS by Isotope Dilution (36 analytes)	PFAS by ID SOP	13C8_PFOS	SESI-0098	101	25-150		%	1
Sand-Feed	PFAS by Isotope Dilution (36 analytes)	PFAS by ID SOP	13C8_PFOSA	SESI-0107	106	10-150		%	1
Sand-Feed	PFAS by Isotope Dilution (36 analytes)	PFAS by ID SOP	13C9_PFNA	SESI-0099	102	25-150		%	1
Sand-Feed	PFAS by Isotope Dilution (36 analytes)	PFAS by ID SOP	d-EtFOSA	SESI-0108	116	10-150		%	1
Sand-Feed	PFAS by Isotope Dilution (36 analytes)	PFAS by ID SOP	d5-EtFOSAA	SESI-0110	103	25-150		%	1
Sand-Feed	PFAS by Isotope Dilution (36 analytes)	PFAS by ID SOP	d9-EtFOSE	SESI-0130	100	10-150		%	1
Sand-Feed	PFAS by Isotope Dilution (36 analytes)	PFAS by ID SOP	d-MeFOSA	SESI-0109	108	10-150		%	1
Sand-Feed	PFAS by Isotope Dilution (36 analytes)	PFAS by ID SOP	d3-MeFOSAA	SESI-0102	106	25-150		%	1
Sand-Feed	PFAS by Isotope Dilution (36 analytes)	PFAS by ID SOP	d7-MeFOSE	SESI-0129	105	10-150		%	1
PY-Sand-1	PFAS by Isotope Dilution (36 analytes)	PFAS by ID SOP	9-chlorohexadecafluoro-3-oxanone-1-sulfonic acid (9Cl-PF3ONS)	756426-58-1	ND	1.8		ug/kg	1
PY-Sand-1	PFAS by Isotope Dilution (36 analytes)	PFAS by ID SOP	11-chloroeicosafluoro-3-oxaundecane-1-sulfonic acid (11Cl-PF3OUdS	763051-92-9	ND	1.8		ug/kg	1
PY-Sand-1	PFAS by Isotope Dilution (36 analytes)	PFAS by ID SOP	1H, 1H, 2H, 2H-perfluorodecane sulfonic acid (8:2 FTS)	39108-34-4	ND	1.8		ug/kg	1
PY-Sand-1	PFAS by Isotope Dilution (36 analytes)	PFAS by ID SOP	1H, 1H, 2H, 2H-perfluorooctane sulfonic acid (6:2 FTS)	27619-97-2	ND	1.8		ug/kg	1
PY-Sand-1	PFAS by Isotope Dilution (36 analytes)	PFAS by ID SOP	1H,1H,2H,2H-perfluorododecane sulfonic acid (10:2 FTS)	120226-60-0	ND	1.8		ug/kg	1
PY-Sand-1	PFAS by Isotope Dilution (36 analytes)	PFAS by ID SOP	1H,1H,2H,2H-perfluorohexane sulfonic acid (4:2 FTS)	757124-72-4	ND	1.8		ug/kg	1
PY-Sand-1	PFAS by Isotope Dilution (36 analytes)	PFAS by ID SOP	Hexafluoropropylene oxide dimer acid (GenX)	13252-13-6	ND	3.7		ug/kg	1
PY-Sand-1	PFAS by Isotope Dilution (36 analytes)	PFAS by ID SOP	4,8-dioxa-3H-perfluorononanoic acid (ADONA)	919005-14-4	ND	1.8		ug/kg	1
PY-Sand-1	PFAS by Isotope Dilution (36 analytes)	PFAS by ID SOP	N-ethylperfluoro-1-octanesulfonamide (EtFOSA)	4151-50-2	ND	1.8		ug/kg	1
PY-Sand-1	PFAS by Isotope Dilution (36 analytes)	PFAS by ID SOP	N-ethylperfluoro-1-octanesulfonamidoacetic acid (EtFOSAA)	2991-50-6	ND	1.8		ug/kg	1
PY-Sand-1	PFAS by Isotope Dilution (36 analytes)	PFAS by ID SOP	2-N-ethylperfluoro-1-octanesulfonamido-ethanol (EtFOSE)	1691-99-2	ND	1.8		ug/kg	1
PY-Sand-1	PFAS by Isotope Dilution (36 analytes)	PFAS by ID SOP	N-methylperfluoro-1-octanesulfonamide (MeFOSA)	31506-32-8	ND	1.8		ug/kg	1
PY-Sand-1	PFAS by Isotope Dilution (36 analytes)	PFAS by ID SOP	N-methylperfluoro-1-octanesulfonamidoacetic acid (MeFOSAA)	2355-31-9	ND	1.8		ug/kg	1
PY-Sand-1	PFAS by Isotope Dilution (36 analytes)	PFAS by ID SOP	2-N-methylperfluoro-1-octanesulfonamido-ethanol (MeFOSE)	24448-09-7	ND	1.8		ug/kg	1
PY-Sand-1	PFAS by Isotope Dilution (36 analytes)	PFAS by ID SOP	Perfluoro-1-butanesulfonic acid (PFBS)	375-73-5	ND	0.92		ug/kg	1
PY-Sand-1	PFAS by Isotope Dilution (36 analytes)	PFAS by ID SOP	Perfluoro-1-decanesulfonic acid (PFDS)	335-77-3	ND	0.92		ug/kg	1
PY-Sand-1	PFAS by Isotope Dilution (36 analytes)	PFAS by ID SOP	Perfluoro-1-heptanesulfonic acid (PFHpS)	375-92-8	ND	0.92		ug/kg	1
PY-Sand-1	PFAS by Isotope Dilution (36 analytes)	PFAS by ID SOP	Perfluoro-1-nonanesulfonic acid (PFNS)	68259-12-1	ND	0.92		ug/kg	1
PY-Sand-1	PFAS by Isotope Dilution (36 analytes)	PFAS by ID SOP	Perfluoro-1-octanesulfonamide (PFOSA)	754-91-6	ND	0.92		ug/kg	1
PY-Sand-1	PFAS by Isotope Dilution (36 analytes)	PFAS by ID SOP	Perfluoro-1-pentanesulfonic acid (PFPeS)	2706-91-4	ND	0.92		ug/kg	1
PY-Sand-1	PFAS by Isotope Dilution (36 analytes)	PFAS by ID SOP	Perfluorododecanesulfonic acid (PFDOS)	79780-39-5	ND	0.92		ug/kg	1
PY-Sand-1	PFAS by Isotope Dilution (36 analytes)	PFAS by ID SOP	Perfluorohexanesulfonic acid (PFHxS)	355-46-4	ND	0.92		ug/kg	1
PY-Sand-1	PFAS by Isotope Dilution (36 analytes)	PFAS by ID SOP	Perfluoro-n-butanoic acid (PFBA)	375-22-4	ND	0.92		ug/kg	1
PY-Sand-1	PFAS by Isotope Dilution (36 analytes)	PFAS by ID SOP	Perfluoro-n-decanoic acid (PFDA)	335-76-2	ND	0.92		ug/kg	1
PY-Sand-1	PFAS by Isotope Dilution (36 analytes)	PFAS by ID SOP	Perfluoro-n-dodecanoic acid (PFDoA)	307-55-1	ND	0.92		ug/kg	1
PY-Sand-1	PFAS by Isotope Dilution (36 analytes)	PFAS by ID SOP	Perfluoro-n-heptanoic acid (PFHpA)	375-85-9	ND	0.92		ug/kg	1
PY-Sand-1	PFAS by Isotope Dilution (36 analytes)	PFAS by ID SOP	Perfluoro-n-hexadecanoic acid (PFHxDA)	67905-19-5	ND	1.8		ug/kg	1
PY-Sand-1	PFAS by Isotope Dilution (36 analytes)	PFAS by ID SOP	Perfluoro-n-hexanoic acid (PFHxA)	307-24-4	ND	0.92		ug/kg	1
PY-Sand-1	PFAS by Isotope Dilution (36 analytes)	PFAS by ID SOP	Perfluoro-n-nonanoic acid (PFNA)	375-95-1	ND	0.92		ug/kg	1
PY-Sand-1	PFAS by Isotope Dilution (36 analytes)	PFAS by ID SOP	Perfluoro-n-octadecanoic acid (PFODA)	16517-11-6	ND	0.92		ug/kg	1
PY-Sand-1	PFAS by Isotope Dilution (36 analytes)	PFAS by ID SOP	Perfluoro-n-octanoic acid (PFOA)	335-67-1	ND	0.92		ug/kg	1
PY-Sand-1	PFAS by Isotope Dilution (36 analytes)	PFAS by ID SOP	Perfluoro-n-pentanoic acid (PFPeA)	2706-90-3	ND	0.92		ug/kg	1
PY-Sand-1	PFAS by Isotope Dilution (36 analytes)	PFAS by ID SOP	Perfluoro-n-tetradecanoic acid (PFTeDA)	376-06-7	ND	0.92		ug/kg	1
PY-Sand-1	PFAS by Isotope Dilution (36 analytes)	PFAS by ID SOP	Perfluoro-n-tridecanoic acid (PFTrDA)	72629-94-8	ND	0.92		ug/kg	1
PY-Sand-1	PFAS by Isotope Dilution (36 analytes)	PFAS by ID SOP	Perfluoro-n-undecanoic acid (PFUdA)	2058-94-8	ND	0.92		ug/kg	1
PY-Sand-1	PFAS by Isotope Dilution (36 analytes)	PFAS by ID SOP	Perfluorooctanesulfonic acid (PFOS)	1763-23-1	ND	0.92		ug/kg	1
PY-Sand-1	PFAS by Isotope Dilution (36 analytes)	PFAS by ID SOP	13C2_4:2FTS	SESI-0104	107	25-150		%	1
PY-Sand-1	PFAS by Isotope Dilution (36 analytes)	PFAS by ID SOP	13C2_6:2FTS	SESI-0105	123	25-150		%	1
PY-Sand-1	PFAS by Isotope Dilution (36 analytes)	PFAS by ID SOP	13C2_8:2FTS	SESI-0106	110	25-150		%	1
PY-Sand-1	PFAS by Isotope Dilution (36 analytes)	PFAS by ID SOP	13C2_PFDoA	SESI-0118	102	25-150		%	1
PY-Sand-1	PFAS by Isotope Dilution (36 analytes)	PFAS by ID SOP	13C2_PFHxDA	SESI-0103	113	25-150		%	1
PY-Sand-1	PFAS by Isotope Dilution (36 analytes)	PFAS by ID SOP	13C2_PFTeDA	SESI-0119	105	25-150		%	1
PY-Sand-1	PFAS by Isotope Dilution (36 analytes)	PFAS by ID SOP	13C3_PFBS	SESI-0116	105	25-150		%	1
PY-Sand-1	PFAS by Isotope Dilution (36 analytes)	PFAS by ID SOP	13C3_PFHxS	SESI-0096	100	25-150		%	1
PY-Sand-1	PFAS by Isotope Dilution (36 analytes)	PFAS by ID SOP	13C3-HFPO-DA	SESI-0121	109	25-150		%	1
PY-Sand-1	PFAS by Isotope Dilution (36 analytes)	PFAS by ID SOP	13C4_PFBA	SESI-0111	101	25-150		%	1
PY-Sand-1	PFAS by Isotope Dilution (36 analytes)	PFAS by ID SOP	13C4_PFHpA	SESI-0114	95	25-150		%	1
PY-Sand-1	PFAS by Isotope Dilution (36 analytes)	PFAS by ID SOP	13C5_PFHxA	SESI-0113	99	25-150		%	1
PY-Sand-1	PFAS by Isotope Dilution (36 analytes)	PFAS by ID SOP	13C5_PFPeA	SESI-0112	100	25-150		%	1
PY-Sand-1	PFAS by Isotope Dilution (36 analytes)	PFAS by ID SOP	13C6_PFDA	SESI-0115	102	25-150		%	1
PY-Sand-1	PFAS by Isotope Dilution (36 analytes)	PFAS by ID SOP	13C7_PFUdA	SESI-0117	103	25-150		%	1
PY-Sand-1	PFAS by Isotope Dilution (36 analytes)	PFAS by ID SOP	13C8_PFOA	SESI-0097	104	25-150		%	1
PY-Sand-1	PFAS by Isotope Dilution (36 analytes)	PFAS by ID SOP	13C8_PFOS	SESI-0098	105	25-150		%	1
PY-Sand-1	PFAS by Isotope Dilution (36 analytes)	PFAS by ID SOP	13C8_PFOSA	SESI-0107	110	10-150		%	1
PY-Sand-1	PFAS by Isotope Dilution (36 analytes)	PFAS by ID SOP	13C9_PFNA	SESI-0099	103	25-150		%	1
PY-Sand-1	PFAS by Isotope Dilution (36 analytes)	PFAS by ID SOP	d-EtFOSA	SESI-0108	101	10-150		%	1
PY-Sand-1	PFAS by Isotope Dilution (36 analytes)	PFAS by ID SOP	d5-EtFOSAA	SESI-0110	114	25-150		%	1
PY-Sand-1	PFAS by Isotope Dilution (36 analytes)	PFAS by ID SOP	d9-EtFOSE	SESI-0130	110	10-150		%	1
PY-Sand-1	PFAS by Isotope Dilution (36 analytes)	PFAS by ID SOP	d-MeFOSA	SESI-0109	101	10-150		%	1
PY-Sand-1	PFAS by Isotope Dilution (36 analytes)	PFAS by ID SOP	d3-MeFOSAA	SESI-0102	103	25-150		%	1
PY-Sand-1	PFAS by Isotope Dilution (36 analytes)	PFAS by ID SOP	d7-MeFOSE	SESI-0129	105	10-150		%	1
PY-Sand-2	No List	%Solids SOP	% Solids	SESI-0001	100	0.000		%	1
PY-Sand-2	PFAS by Isotope Dilution (36 analytes)	PFAS by ID SOP	9-chlorohexadecafluoro-3-oxanone-1-sulfonic acid (9Cl-PF3ONS)	756426-58-1	ND	1.8		ug/kg	1
PY-Sand-2	PFAS by Isotope Dilution (36 analytes)	PFAS by ID SOP	11-chloroeicosafluoro-3-oxaundecane-1-sulfonic acid (11Cl-PF3OUdS	763051-92-9	ND	1.8		ug/kg	1
PY-Sand-2	PFAS by Isotope Dilution (36 analytes)	PFAS by ID SOP	1H, 1H, 2H, 2H-perfluorodecane sulfonic acid (8:2 FTS)	39108-34-4	ND	1.8		ug/kg	1
PY-Sand-2	PFAS by Isotope Dilution (36 analytes)	PFAS by ID SOP	1H, 1H, 2H, 2H-perfluorooctane sulfonic acid (6:2 FTS)	27619-97-2	ND	1.8		ug/kg	1
PY-Sand-2	PFAS by Isotope Dilution (36 analytes)	PFAS by ID SOP	1H,1H,2H,2H-perfluorododecane sulfonic acid (10:2 FTS)	120226-60-0	ND	1.8		ug/kg	1
PY-Sand-2	PFAS by Isotope Dilution (36 analytes)	PFAS by ID SOP	1H,1H,2H,2H-perfluorohexane sulfonic acid (4:2 FTS)	757124-72-4	ND	1.8		ug/kg	1
PY-Sand-2	PFAS by Isotope Dilution (36 analytes)	PFAS by ID SOP	Hexafluoropropylene oxide dimer acid (GenX)	13252-13-6	ND	3.6		ug/kg	1
PY-Sand-2	PFAS by Isotope Dilution (36 analytes)	PFAS by ID SOP	4,8-dioxa-3H-perfluorononanoic acid (ADONA)	919005-14-4	ND	1.8		ug/kg	1
PY-Sand-2	PFAS by Isotope Dilution (36 analytes)	PFAS by ID SOP	N-ethylperfluoro-1-octanesulfonamide (EtFOSA)	4151-50-2	ND	1.8		ug/kg	1
PY-Sand-2	PFAS by Isotope Dilution (36 analytes)	PFAS by ID SOP	N-ethylperfluoro-1-octanesulfonamidoacetic acid (EtFOSAA)	2991-50-6	ND	1.8		ug/kg	1
PY-Sand-2	PFAS by Isotope Dilution (36 analytes)	PFAS by ID SOP	2-N-ethylperfluoro-1-octanesulfonamido-ethanol (EtFOSE)	1691-99-2	ND	1.8		ug/kg	1
PY-Sand-2	PFAS by Isotope Dilution (36 analytes)	PFAS by ID SOP	N-methylperfluoro-1-octanesulfonamide (MeFOSA)	31506-32-8	ND	1.8		ug/kg	1
PY-Sand-2	PFAS by Isotope Dilution (36 analytes)	PFAS by ID SOP	N-methylperfluoro-1-octanesulfonamidoacetic acid (MeFOSAA)	2355-31-9	ND	1.8		ug/kg	1
PY-Sand-2	PFAS by Isotope Dilution (36 analytes)	PFAS by ID SOP	2-N-methylperfluoro-1-octanesulfonamido-ethanol (MeFOSE)	24448-09-7	ND	1.8		ug/kg	1
PY-Sand-2	PFAS by Isotope Dilution (36 analytes)	PFAS by ID SOP	Perfluoro-1-butanesulfonic acid (PFBS)	375-73-5	ND	0.90		ug/kg	1
PY-Sand-2	PFAS by Isotope Dilution (36 analytes)	PFAS by ID SOP	Perfluoro-1-decanesulfonic acid (PFDS)	335-77-3	ND	0.90		ug/kg	1
PY-Sand-2	PFAS by Isotope Dilution (36 analytes)	PFAS by ID SOP	Perfluoro-1-heptanesulfonic acid (PFHpS)	375-92-8	ND	0.90		ug/kg	1
PY-Sand-2	PFAS by Isotope Dilution (36 analytes)	PFAS by ID SOP	Perfluoro-1-nonanesulfonic acid (PFNS)	68259-12-1	ND	0.90		ug/kg	1
PY-Sand-2	PFAS by Isotope Dilution (36 analytes)	PFAS by ID SOP	Perfluoro-1-octanesulfonamide (PFOSA)	754-91-6	ND	0.90		ug/kg	1
PY-Sand-2	PFAS by Isotope Dilution (36 analytes)	PFAS by ID SOP	Perfluoro-1-pentanesulfonic acid (PFPeS)	2706-91-4	ND	0.90		ug/kg	1
PY-Sand-2	PFAS by Isotope Dilution (36 analytes)	PFAS by ID SOP	Perfluorododecanesulfonic acid (PFDOS)	79780-39-5	ND	0.90		ug/kg	1
PY-Sand-2	PFAS by Isotope Dilution (36 analytes)	PFAS by ID SOP	Perfluorohexanesulfonic acid (PFHxS)	355-46-4	ND	0.90		ug/kg	1
PY-Sand-2	PFAS by Isotope Dilution (36 analytes)	PFAS by ID SOP	Perfluoro-n-butanoic acid (PFBA)	375-22-4	ND	0.90		ug/kg	1
PY-Sand-2	PFAS by Isotope Dilution (36 analytes)	PFAS by ID SOP	Perfluoro-n-decanoic acid (PFDA)	335-76-2	ND	0.90		ug/kg	1
PY-Sand-2	PFAS by Isotope Dilution (36 analytes)	PFAS by ID SOP	Perfluoro-n-dodecanoic acid (PFDoA)	307-55-1	ND	0.90		ug/kg	1
PY-Sand-2	PFAS by Isotope Dilution (36 analytes)	PFAS by ID SOP	Perfluoro-n-heptanoic acid (PFHpA)	375-85-9	ND	0.90		ug/kg	1
PY-Sand-2	PFAS by Isotope Dilution (36 analytes)	PFAS by ID SOP	Perfluoro-n-hexadecanoic acid (PFHxDA)	67905-19-5	ND	1.8		ug/kg	1
PY-Sand-2	PFAS by Isotope Dilution (36 analytes)	PFAS by ID SOP	Perfluoro-n-hexanoic acid (PFHxA)	307-24-4	ND	0.90		ug/kg	1
PY-Sand-2	PFAS by Isotope Dilution (36 analytes)	PFAS by ID SOP	Perfluoro-n-nonanoic acid (PFNA)	375-95-1	ND	0.90		ug/kg	1
PY-Sand-2	PFAS by Isotope Dilution (36 analytes)	PFAS by ID SOP	Perfluoro-n-octadecanoic acid (PFODA)	16517-11-6	ND	0.90		ug/kg	1
PY-Sand-2	PFAS by Isotope Dilution (36 analytes)	PFAS by ID SOP	Perfluoro-n-octanoic acid (PFOA)	335-67-1	ND	0.90		ug/kg	1
PY-Sand-2	PFAS by Isotope Dilution (36 analytes)	PFAS by ID SOP	Perfluoro-n-pentanoic acid (PFPeA)	2706-90-3	ND	0.90		ug/kg	1
PY-Sand-2	PFAS by Isotope Dilution (36 analytes)	PFAS by ID SOP	Perfluoro-n-tetradecanoic acid (PFTeDA)	376-06-7	ND	0.90		ug/kg	1
PY-Sand-2	PFAS by Isotope Dilution (36 analytes)	PFAS by ID SOP	Perfluoro-n-tridecanoic acid (PFTrDA)	72629-94-8	ND	0.90		ug/kg	1
PY-Sand-2	PFAS by Isotope Dilution (36 analytes)	PFAS by ID SOP	Perfluoro-n-undecanoic acid (PFUdA)	2058-94-8	ND	0.90		ug/kg	1
PY-Sand-2	PFAS by Isotope Dilution (36 analytes)	PFAS by ID SOP	Perfluorooctanesulfonic acid (PFOS)	1763-23-1	ND	0.90		ug/kg	1
PY-Sand-2	PFAS by Isotope Dilution (36 analytes)	PFAS by ID SOP	13C2_4:2FTS	SESI-0104	111	25-150		%	1
PY-Sand-2	PFAS by Isotope Dilution (36 analytes)	PFAS by ID SOP	13C2_6:2FTS	SESI-0105	127	25-150		%	1
PY-Sand-2	PFAS by Isotope Dilution (36 analytes)	PFAS by ID SOP	13C2_8:2FTS	SESI-0106	116	25-150		%	1
PY-Sand-2	PFAS by Isotope Dilution (36 analytes)	PFAS by ID SOP	13C2_PFDoA	SESI-0118	106	25-150		%	1
PY-Sand-2	PFAS by Isotope Dilution (36 analytes)	PFAS by ID SOP	13C2_PFHxDA	SESI-0103	115	25-150		%	1
PY-Sand-2	PFAS by Isotope Dilution (36 analytes)	PFAS by ID SOP	13C2_PFTeDA	SESI-0119	105	25-150		%	1
PY-Sand-2	PFAS by Isotope Dilution (36 analytes)	PFAS by ID SOP	13C3_PFBS	SESI-0116	110	25-150		%	1
PY-Sand-2	PFAS by Isotope Dilution (36 analytes)	PFAS by ID SOP	13C3_PFHxS	SESI-0096	97	25-150		%	1
PY-Sand-2	PFAS by Isotope Dilution (36 analytes)	PFAS by ID SOP	13C3-HFPO-DA	SESI-0121	115	25-150		%	1
PY-Sand-2	PFAS by Isotope Dilution (36 analytes)	PFAS by ID SOP	13C4_PFBA	SESI-0111	102	25-150		%	1
PY-Sand-2	PFAS by Isotope Dilution (36 analytes)	PFAS by ID SOP	13C4_PFHpA	SESI-0114	100	25-150		%	1
PY-Sand-2	PFAS by Isotope Dilution (36 analytes)	PFAS by ID SOP	13C5_PFHxA	SESI-0113	96	25-150		%	1
PY-Sand-2	PFAS by Isotope Dilution (36 analytes)	PFAS by ID SOP	13C5_PFPeA	SESI-0112	99	25-150		%	1
PY-Sand-2	PFAS by Isotope Dilution (36 analytes)	PFAS by ID SOP	13C6_PFDA	SESI-0115	97	25-150		%	1
PY-Sand-2	PFAS by Isotope Dilution (36 analytes)	PFAS by ID SOP	13C7_PFUdA	SESI-0117	104	25-150		%	1
PY-Sand-2	PFAS by Isotope Dilution (36 analytes)	PFAS by ID SOP	13C8_PFOA	SESI-0097	103	25-150		%	1
PY-Sand-2	PFAS by Isotope Dilution (36 analytes)	PFAS by ID SOP	13C8_PFOS	SESI-0098	105	25-150		%	1
PY-Sand-2	PFAS by Isotope Dilution (36 analytes)	PFAS by ID SOP	13C8_PFOSA	SESI-0107	114	10-150		%	1
PY-Sand-2	PFAS by Isotope Dilution (36 analytes)	PFAS by ID SOP	13C9_PFNA	SESI-0099	101	25-150		%	1
PY-Sand-2	PFAS by Isotope Dilution (36 analytes)	PFAS by ID SOP	d-EtFOSA	SESI-0108	103	10-150		%	1
PY-Sand-2	PFAS by Isotope Dilution (36 analytes)	PFAS by ID SOP	d5-EtFOSAA	SESI-0110	112	25-150		%	1
PY-Sand-2	PFAS by Isotope Dilution (36 analytes)	PFAS by ID SOP	d9-EtFOSE	SESI-0130	111	10-150		%	1
PY-Sand-2	PFAS by Isotope Dilution (36 analytes)	PFAS by ID SOP	d-MeFOSA	SESI-0109	109	10-150		%	1
PY-Sand-2	PFAS by Isotope Dilution (36 analytes)	PFAS by ID SOP	d3-MeFOSAA	SESI-0102	105	25-150		%	1
PY-Sand-2	PFAS by Isotope Dilution (36 analytes)	PFAS by ID SOP	d7-MeFOSE	SESI-0129	107	10-150		%	1
Liq-Blank-1	PFAS by Isotope Dilution (36 analytes) (Non-AQ)	PFAS by ID SOP	9-chlorohexadecafluoro-3-oxanone-1-sulfonic acid (9Cl-PF3ONS)	756426-58-1	ND	10000		ng/L	25
Liq-Blank-1	PFAS by Isotope Dilution (36 analytes) (Non-AQ)	PFAS by ID SOP	11-chloroeicosafluoro-3-oxaundecane-1-sulfonic acid (11Cl-PF3OUdS	763051-92-9	ND	10000		ng/L	25
Liq-Blank-1	PFAS by Isotope Dilution (36 analytes) (Non-AQ)	PFAS by ID SOP	1H, 1H, 2H, 2H-perfluorodecane sulfonic acid (8:2 FTS)	39108-34-4	ND	10000		ng/L	25
Liq-Blank-1	PFAS by Isotope Dilution (36 analytes) (Non-AQ)	PFAS by ID SOP	1H, 1H, 2H, 2H-perfluorooctane sulfonic acid (6:2 FTS)	27619-97-2	ND	10000		ng/L	25
Liq-Blank-1	PFAS by Isotope Dilution (36 analytes) (Non-AQ)	PFAS by ID SOP	1H,1H,2H,2H-perfluorododecane sulfonic acid (10:2 FTS)	120226-60-0	ND	10000		ng/L	25
Liq-Blank-1	PFAS by Isotope Dilution (36 analytes) (Non-AQ)	PFAS by ID SOP	1H,1H,2H,2H-perfluorohexane sulfonic acid (4:2 FTS)	757124-72-4	ND	10000		ng/L	25
Liq-Blank-1	PFAS by Isotope Dilution (36 analytes) (Non-AQ)	PFAS by ID SOP	Hexafluoropropylene oxide dimer acid (GenX)	13252-13-6	ND	10000		ng/L	25
Liq-Blank-1	PFAS by Isotope Dilution (36 analytes) (Non-AQ)	PFAS by ID SOP	4,8-dioxa-3H-perfluorononanoic acid (ADONA)	919005-14-4	ND	10000		ng/L	25
Liq-Blank-1	PFAS by Isotope Dilution (36 analytes) (Non-AQ)	PFAS by ID SOP	N-ethylperfluoro-1-octanesulfonamide (EtFOSA)	4151-50-2	ND	10000		ng/L	25
Liq-Blank-1	PFAS by Isotope Dilution (36 analytes) (Non-AQ)	PFAS by ID SOP	N-ethylperfluoro-1-octanesulfonamidoacetic acid (EtFOSAA)	2991-50-6	ND	10000		ng/L	25
Liq-Blank-1	PFAS by Isotope Dilution (36 analytes) (Non-AQ)	PFAS by ID SOP	2-N-ethylperfluoro-1-octanesulfonamido-ethanol (EtFOSE)	1691-99-2	ND	10000		ng/L	25
Liq-Blank-1	PFAS by Isotope Dilution (36 analytes) (Non-AQ)	PFAS by ID SOP	N-methylperfluoro-1-octanesulfonamide (MeFOSA)	31506-32-8	ND	20000		ng/L	25
Liq-Blank-1	PFAS by Isotope Dilution (36 analytes) (Non-AQ)	PFAS by ID SOP	N-methylperfluoro-1-octanesulfonamidoacetic acid (MeFOSAA)	2355-31-9	ND	10000		ng/L	25
Liq-Blank-1	PFAS by Isotope Dilution (36 analytes) (Non-AQ)	PFAS by ID SOP	2-N-methylperfluoro-1-octanesulfonamido-ethanol (MeFOSE)	24448-09-7	ND	10000		ng/L	25
Liq-Blank-1	PFAS by Isotope Dilution (36 analytes) (Non-AQ)	PFAS by ID SOP	Perfluoro-1-butanesulfonic acid (PFBS)	375-73-5	ND	5000		ng/L	25
Liq-Blank-1	PFAS by Isotope Dilution (36 analytes) (Non-AQ)	PFAS by ID SOP	Perfluoro-1-decanesulfonic acid (PFDS)	335-77-3	ND	5000		ng/L	25
Liq-Blank-1	PFAS by Isotope Dilution (36 analytes) (Non-AQ)	PFAS by ID SOP	Perfluoro-1-heptanesulfonic acid (PFHpS)	375-92-8	ND	5000		ng/L	25
Liq-Blank-1	PFAS by Isotope Dilution (36 analytes) (Non-AQ)	PFAS by ID SOP	Perfluoro-1-nonanesulfonic acid (PFNS)	68259-12-1	ND	5000		ng/L	25
Liq-Blank-1	PFAS by Isotope Dilution (36 analytes) (Non-AQ)	PFAS by ID SOP	Perfluoro-1-octanesulfonamide (PFOSA)	754-91-6	ND	5000		ng/L	25
Liq-Blank-1	PFAS by Isotope Dilution (36 analytes) (Non-AQ)	PFAS by ID SOP	Perfluoro-1-pentanesulfonic acid (PFPeS)	2706-91-4	ND	5000		ng/L	25
Liq-Blank-1	PFAS by Isotope Dilution (36 analytes) (Non-AQ)	PFAS by ID SOP	Perfluorododecanesulfonic acid (PFDOS)	79780-39-5	ND	10000		ng/L	25
Liq-Blank-1	PFAS by Isotope Dilution (36 analytes) (Non-AQ)	PFAS by ID SOP	Perfluorohexanesulfonic acid (PFHxS)	355-46-4	ND	5000		ng/L	25
Liq-Blank-1	PFAS by Isotope Dilution (36 analytes) (Non-AQ)	PFAS by ID SOP	Perfluoro-n-butanoic acid (PFBA)	375-22-4	ND	5000		ng/L	25
Liq-Blank-1	PFAS by Isotope Dilution (36 analytes) (Non-AQ)	PFAS by ID SOP	Perfluoro-n-decanoic acid (PFDA)	335-76-2	ND	5000		ng/L	25
Liq-Blank-1	PFAS by Isotope Dilution (36 analytes) (Non-AQ)	PFAS by ID SOP	Perfluoro-n-dodecanoic acid (PFDoA)	307-55-1	ND	5000		ng/L	25
Liq-Blank-1	PFAS by Isotope Dilution (36 analytes) (Non-AQ)	PFAS by ID SOP	Perfluoro-n-heptanoic acid (PFHpA)	375-85-9	ND	5000		ng/L	25
Liq-Blank-1	PFAS by Isotope Dilution (36 analytes) (Non-AQ)	PFAS by ID SOP	Perfluoro-n-hexadecanoic acid (PFHxDA)	67905-19-5	ND	10000		ng/L	25
Liq-Blank-1	PFAS by Isotope Dilution (36 analytes) (Non-AQ)	PFAS by ID SOP	Perfluoro-n-hexanoic acid (PFHxA)	307-24-4	ND	5000		ng/L	25
Liq-Blank-1	PFAS by Isotope Dilution (36 analytes) (Non-AQ)	PFAS by ID SOP	Perfluoro-n-nonanoic acid (PFNA)	375-95-1	ND	5000		ng/L	25
Liq-Blank-1	PFAS by Isotope Dilution (36 analytes) (Non-AQ)	PFAS by ID SOP	Perfluoro-n-octadecanoic acid (PFODA)	16517-11-6	ND	10000		ng/L	25
Liq-Blank-1	PFAS by Isotope Dilution (36 analytes) (Non-AQ)	PFAS by ID SOP	Perfluoro-n-octanoic acid (PFOA)	335-67-1	ND	5000		ng/L	25
Liq-Blank-1	PFAS by Isotope Dilution (36 analytes) (Non-AQ)	PFAS by ID SOP	Perfluoro-n-pentanoic acid (PFPeA)	2706-90-3	ND	5000		ng/L	25
Liq-Blank-1	PFAS by Isotope Dilution (36 analytes) (Non-AQ)	PFAS by ID SOP	Perfluoro-n-tetradecanoic acid (PFTeDA)	376-06-7	ND	5000		ng/L	25
Liq-Blank-1	PFAS by Isotope Dilution (36 analytes) (Non-AQ)	PFAS by ID SOP	Perfluoro-n-tridecanoic acid (PFTrDA)	72629-94-8	ND	5000		ng/L	25
Liq-Blank-1	PFAS by Isotope Dilution (36 analytes) (Non-AQ)	PFAS by ID SOP	Perfluoro-n-undecanoic acid (PFUdA)	2058-94-8	ND	5000		ng/L	25
Liq-Blank-1	PFAS by Isotope Dilution (36 analytes) (Non-AQ)	PFAS by ID SOP	Perfluorooctanesulfonic acid (PFOS)	1763-23-1	ND	5000		ng/L	25
Liq-Blank-1	PFAS by Isotope Dilution (36 analytes) (Non-AQ)	PFAS by ID SOP	13C2_4:2FTS	SESI-0104	108	6.0134700169990		%	25
Liq-Blank-1	PFAS by Isotope Dilution (36 analytes) (Non-AQ)	PFAS by ID SOP	13C2_6:2FTS	SESI-0105	94	6.0134700169990		%	25
Liq-Blank-1	PFAS by Isotope Dilution (36 analytes) (Non-AQ)	PFAS by ID SOP	13C2_8:2FTS	SESI-0106	107	6.0134700169990		%	25
Liq-Blank-1	PFAS by Isotope Dilution (36 analytes) (Non-AQ)	PFAS by ID SOP	13C2_PFDoA	SESI-0118	105	6.0134700169990		%	25
Liq-Blank-1	PFAS by Isotope Dilution (36 analytes) (Non-AQ)	PFAS by ID SOP	13C2_PFHxDA	SESI-0103	110	6.0134700169990		%	25
Liq-Blank-1	PFAS by Isotope Dilution (36 analytes) (Non-AQ)	PFAS by ID SOP	13C2_PFTeDA	SESI-0119	115	6.0134700169990		%	25
Liq-Blank-1	PFAS by Isotope Dilution (36 analytes) (Non-AQ)	PFAS by ID SOP	13C3_PFBS	SESI-0116	109	6.0134700169990		%	25
Liq-Blank-1	PFAS by Isotope Dilution (36 analytes) (Non-AQ)	PFAS by ID SOP	13C3_PFHxS	SESI-0096	105	6.0134700169990		%	25
Liq-Blank-1	PFAS by Isotope Dilution (36 analytes) (Non-AQ)	PFAS by ID SOP	13C3-HFPO-DA	SESI-0121	107	6.0134700169990		%	25
Liq-Blank-1	PFAS by Isotope Dilution (36 analytes) (Non-AQ)	PFAS by ID SOP	13C4_PFBA	SESI-0111	106	6.0134700169990		%	25
Liq-Blank-1	PFAS by Isotope Dilution (36 analytes) (Non-AQ)	PFAS by ID SOP	13C4_PFHpA	SESI-0114	106	6.0134700169990		%	25
Liq-Blank-1	PFAS by Isotope Dilution (36 analytes) (Non-AQ)	PFAS by ID SOP	13C5_PFHxA	SESI-0113	107	6.0134700169990		%	25
Liq-Blank-1	PFAS by Isotope Dilution (36 analytes) (Non-AQ)	PFAS by ID SOP	13C5_PFPeA	SESI-0112	110	6.0134700169990		%	25
Liq-Blank-1	PFAS by Isotope Dilution (36 analytes) (Non-AQ)	PFAS by ID SOP	13C6_PFDA	SESI-0115	107	6.0134700169990		%	25
Liq-Blank-1	PFAS by Isotope Dilution (36 analytes) (Non-AQ)	PFAS by ID SOP	13C7_PFUdA	SESI-0117	104	6.0134700169990		%	25
Liq-Blank-1	PFAS by Isotope Dilution (36 analytes) (Non-AQ)	PFAS by ID SOP	13C8_PFOA	SESI-0097	107	6.0134700169990		%	25
Liq-Blank-1	PFAS by Isotope Dilution (36 analytes) (Non-AQ)	PFAS by ID SOP	13C8_PFOS	SESI-0098	96	6.0134700169990		%	25
Liq-Blank-1	PFAS by Isotope Dilution (36 analytes) (Non-AQ)	PFAS by ID SOP	13C8_PFOSA	SESI-0107	106	6.0134700169990		%	25
Liq-Blank-1	PFAS by Isotope Dilution (36 analytes) (Non-AQ)	PFAS by ID SOP	13C9_PFNA	SESI-0099	106	6.0134700169990		%	25
Liq-Blank-1	PFAS by Isotope Dilution (36 analytes) (Non-AQ)	PFAS by ID SOP	d-EtFOSA	SESI-0108	98	6.0134700169990		%	25
Liq-Blank-1	PFAS by Isotope Dilution (36 analytes) (Non-AQ)	PFAS by ID SOP	d5-EtFOSAA	SESI-0110	110	6.0134700169990		%	25
Liq-Blank-1	PFAS by Isotope Dilution (36 analytes) (Non-AQ)	PFAS by ID SOP	d9-EtFOSE	SESI-0130	102	6.0134700169990		%	25
Liq-Blank-1	PFAS by Isotope Dilution (36 analytes) (Non-AQ)	PFAS by ID SOP	d-MeFOSA	SESI-0109	107	6.0134700169990		%	25
Liq-Blank-1	PFAS by Isotope Dilution (36 analytes) (Non-AQ)	PFAS by ID SOP	d3-MeFOSAA	SESI-0102	109	6.0134700169990		%	25
Liq-Blank-1	PFAS by Isotope Dilution (36 analytes) (Non-AQ)	PFAS by ID SOP	d7-MeFOSE	SESI-0129	103	6.0134700169990		%	25
Liq-Blank-2	PFAS by Isotope Dilution (36 analytes) (Non-AQ)	PFAS by ID SOP	9-chlorohexadecafluoro-3-oxanone-1-sulfonic acid (9Cl-PF3ONS)	756426-58-1	ND	10000		ng/L	25
Liq-Blank-2	PFAS by Isotope Dilution (36 analytes) (Non-AQ)	PFAS by ID SOP	11-chloroeicosafluoro-3-oxaundecane-1-sulfonic acid (11Cl-PF3OUdS	763051-92-9	ND	10000		ng/L	25
Liq-Blank-2	PFAS by Isotope Dilution (36 analytes) (Non-AQ)	PFAS by ID SOP	1H, 1H, 2H, 2H-perfluorodecane sulfonic acid (8:2 FTS)	39108-34-4	ND	10000		ng/L	25
Liq-Blank-2	PFAS by Isotope Dilution (36 analytes) (Non-AQ)	PFAS by ID SOP	1H, 1H, 2H, 2H-perfluorooctane sulfonic acid (6:2 FTS)	27619-97-2	ND	10000		ng/L	25
Liq-Blank-2	PFAS by Isotope Dilution (36 analytes) (Non-AQ)	PFAS by ID SOP	1H,1H,2H,2H-perfluorododecane sulfonic acid (10:2 FTS)	120226-60-0	ND	10000		ng/L	25
Liq-Blank-2	PFAS by Isotope Dilution (36 analytes) (Non-AQ)	PFAS by ID SOP	1H,1H,2H,2H-perfluorohexane sulfonic acid (4:2 FTS)	757124-72-4	ND	10000		ng/L	25
Liq-Blank-2	PFAS by Isotope Dilution (36 analytes) (Non-AQ)	PFAS by ID SOP	Hexafluoropropylene oxide dimer acid (GenX)	13252-13-6	ND	10000		ng/L	25
Liq-Blank-2	PFAS by Isotope Dilution (36 analytes) (Non-AQ)	PFAS by ID SOP	4,8-dioxa-3H-perfluorononanoic acid (ADONA)	919005-14-4	ND	10000		ng/L	25
Liq-Blank-2	PFAS by Isotope Dilution (36 analytes) (Non-AQ)	PFAS by ID SOP	N-ethylperfluoro-1-octanesulfonamide (EtFOSA)	4151-50-2	ND	10000		ng/L	25
Liq-Blank-2	PFAS by Isotope Dilution (36 analytes) (Non-AQ)	PFAS by ID SOP	N-ethylperfluoro-1-octanesulfonamidoacetic acid (EtFOSAA)	2991-50-6	ND	10000		ng/L	25
Liq-Blank-2	PFAS by Isotope Dilution (36 analytes) (Non-AQ)	PFAS by ID SOP	2-N-ethylperfluoro-1-octanesulfonamido-ethanol (EtFOSE)	1691-99-2	ND	10000		ng/L	25
Liq-Blank-2	PFAS by Isotope Dilution (36 analytes) (Non-AQ)	PFAS by ID SOP	N-methylperfluoro-1-octanesulfonamide (MeFOSA)	31506-32-8	ND	20000		ng/L	25
Liq-Blank-2	PFAS by Isotope Dilution (36 analytes) (Non-AQ)	PFAS by ID SOP	N-methylperfluoro-1-octanesulfonamidoacetic acid (MeFOSAA)	2355-31-9	ND	10000		ng/L	25
Liq-Blank-2	PFAS by Isotope Dilution (36 analytes) (Non-AQ)	PFAS by ID SOP	2-N-methylperfluoro-1-octanesulfonamido-ethanol (MeFOSE)	24448-09-7	ND	10000		ng/L	25
Liq-Blank-2	PFAS by Isotope Dilution (36 analytes) (Non-AQ)	PFAS by ID SOP	Perfluoro-1-butanesulfonic acid (PFBS)	375-73-5	ND	5000		ng/L	25
Liq-Blank-2	PFAS by Isotope Dilution (36 analytes) (Non-AQ)	PFAS by ID SOP	Perfluoro-1-decanesulfonic acid (PFDS)	335-77-3	ND	5000		ng/L	25
Liq-Blank-2	PFAS by Isotope Dilution (36 analytes) (Non-AQ)	PFAS by ID SOP	Perfluoro-1-heptanesulfonic acid (PFHpS)	375-92-8	ND	5000		ng/L	25
Liq-Blank-2	PFAS by Isotope Dilution (36 analytes) (Non-AQ)	PFAS by ID SOP	Perfluoro-1-nonanesulfonic acid (PFNS)	68259-12-1	ND	5000		ng/L	25
Liq-Blank-2	PFAS by Isotope Dilution (36 analytes) (Non-AQ)	PFAS by ID SOP	Perfluoro-1-octanesulfonamide (PFOSA)	754-91-6	ND	5000		ng/L	25
Liq-Blank-2	PFAS by Isotope Dilution (36 analytes) (Non-AQ)	PFAS by ID SOP	Perfluoro-1-pentanesulfonic acid (PFPeS)	2706-91-4	ND	5000		ng/L	25
Liq-Blank-2	PFAS by Isotope Dilution (36 analytes) (Non-AQ)	PFAS by ID SOP	Perfluorododecanesulfonic acid (PFDOS)	79780-39-5	ND	10000		ng/L	25
Liq-Blank-2	PFAS by Isotope Dilution (36 analytes) (Non-AQ)	PFAS by ID SOP	Perfluorohexanesulfonic acid (PFHxS)	355-46-4	ND	5000		ng/L	25
Liq-Blank-2	PFAS by Isotope Dilution (36 analytes) (Non-AQ)	PFAS by ID SOP	Perfluoro-n-butanoic acid (PFBA)	375-22-4	ND	5000		ng/L	25
Liq-Blank-2	PFAS by Isotope Dilution (36 analytes) (Non-AQ)	PFAS by ID SOP	Perfluoro-n-decanoic acid (PFDA)	335-76-2	ND	5000		ng/L	25
Liq-Blank-2	PFAS by Isotope Dilution (36 analytes) (Non-AQ)	PFAS by ID SOP	Perfluoro-n-dodecanoic acid (PFDoA)	307-55-1	ND	5000		ng/L	25
Liq-Blank-2	PFAS by Isotope Dilution (36 analytes) (Non-AQ)	PFAS by ID SOP	Perfluoro-n-heptanoic acid (PFHpA)	375-85-9	ND	5000		ng/L	25
Liq-Blank-2	PFAS by Isotope Dilution (36 analytes) (Non-AQ)	PFAS by ID SOP	Perfluoro-n-hexadecanoic acid (PFHxDA)	67905-19-5	ND	10000		ng/L	25
Liq-Blank-2	PFAS by Isotope Dilution (36 analytes) (Non-AQ)	PFAS by ID SOP	Perfluoro-n-hexanoic acid (PFHxA)	307-24-4	ND	5000		ng/L	25
Liq-Blank-2	PFAS by Isotope Dilution (36 analytes) (Non-AQ)	PFAS by ID SOP	Perfluoro-n-nonanoic acid (PFNA)	375-95-1	ND	5000		ng/L	25
Liq-Blank-2	PFAS by Isotope Dilution (36 analytes) (Non-AQ)	PFAS by ID SOP	Perfluoro-n-octadecanoic acid (PFODA)	16517-11-6	ND	10000		ng/L	25
Liq-Blank-2	PFAS by Isotope Dilution (36 analytes) (Non-AQ)	PFAS by ID SOP	Perfluoro-n-octanoic acid (PFOA)	335-67-1	ND	5000		ng/L	25
Liq-Blank-2	PFAS by Isotope Dilution (36 analytes) (Non-AQ)	PFAS by ID SOP	Perfluoro-n-pentanoic acid (PFPeA)	2706-90-3	ND	5000		ng/L	25
Liq-Blank-2	PFAS by Isotope Dilution (36 analytes) (Non-AQ)	PFAS by ID SOP	Perfluoro-n-tetradecanoic acid (PFTeDA)	376-06-7	ND	5000		ng/L	25
Liq-Blank-2	PFAS by Isotope Dilution (36 analytes) (Non-AQ)	PFAS by ID SOP	Perfluoro-n-tridecanoic acid (PFTrDA)	72629-94-8	ND	5000		ng/L	25
Liq-Blank-2	PFAS by Isotope Dilution (36 analytes) (Non-AQ)	PFAS by ID SOP	Perfluoro-n-undecanoic acid (PFUdA)	2058-94-8	ND	5000		ng/L	25
Liq-Blank-2	PFAS by Isotope Dilution (36 analytes) (Non-AQ)	PFAS by ID SOP	Perfluorooctanesulfonic acid (PFOS)	1763-23-1	ND	5000		ng/L	25
Liq-Blank-2	PFAS by Isotope Dilution (36 analytes) (Non-AQ)	PFAS by ID SOP	13C2_4:2FTS	SESI-0104	97	6.0134700169990		%	25
Liq-Blank-2	PFAS by Isotope Dilution (36 analytes) (Non-AQ)	PFAS by ID SOP	13C2_6:2FTS	SESI-0105	93	6.0134700169990		%	25
Liq-Blank-2	PFAS by Isotope Dilution (36 analytes) (Non-AQ)	PFAS by ID SOP	13C2_8:2FTS	SESI-0106	103	6.0134700169990		%	25
Liq-Blank-2	PFAS by Isotope Dilution (36 analytes) (Non-AQ)	PFAS by ID SOP	13C2_PFDoA	SESI-0118	102	6.0134700169990		%	25
Liq-Blank-2	PFAS by Isotope Dilution (36 analytes) (Non-AQ)	PFAS by ID SOP	13C2_PFHxDA	SESI-0103	106	6.0134700169990		%	25
Liq-Blank-2	PFAS by Isotope Dilution (36 analytes) (Non-AQ)	PFAS by ID SOP	13C2_PFTeDA	SESI-0119	107	6.0134700169990		%	25
Liq-Blank-2	PFAS by Isotope Dilution (36 analytes) (Non-AQ)	PFAS by ID SOP	13C3_PFBS	SESI-0116	102	6.0134700169990		%	25
Liq-Blank-2	PFAS by Isotope Dilution (36 analytes) (Non-AQ)	PFAS by ID SOP	13C3_PFHxS	SESI-0096	99	6.0134700169990		%	25
Liq-Blank-2	PFAS by Isotope Dilution (36 analytes) (Non-AQ)	PFAS by ID SOP	13C3-HFPO-DA	SESI-0121	101	6.0134700169990		%	25
Liq-Blank-2	PFAS by Isotope Dilution (36 analytes) (Non-AQ)	PFAS by ID SOP	13C4_PFBA	SESI-0111	101	6.0134700169990		%	25
Liq-Blank-2	PFAS by Isotope Dilution (36 analytes) (Non-AQ)	PFAS by ID SOP	13C4_PFHpA	SESI-0114	102	6.0134700169990		%	25
Liq-Blank-2	PFAS by Isotope Dilution (36 analytes) (Non-AQ)	PFAS by ID SOP	13C5_PFHxA	SESI-0113	102	6.0134700169990		%	25
Liq-Blank-2	PFAS by Isotope Dilution (36 analytes) (Non-AQ)	PFAS by ID SOP	13C5_PFPeA	SESI-0112	101	6.0134700169990		%	25
Liq-Blank-2	PFAS by Isotope Dilution (36 analytes) (Non-AQ)	PFAS by ID SOP	13C6_PFDA	SESI-0115	100	6.0134700169990		%	25
Liq-Blank-2	PFAS by Isotope Dilution (36 analytes) (Non-AQ)	PFAS by ID SOP	13C7_PFUdA	SESI-0117	103	6.0134700169990		%	25
Liq-Blank-2	PFAS by Isotope Dilution (36 analytes) (Non-AQ)	PFAS by ID SOP	13C8_PFOA	SESI-0097	98	6.0134700169990		%	25
Liq-Blank-2	PFAS by Isotope Dilution (36 analytes) (Non-AQ)	PFAS by ID SOP	13C8_PFOS	SESI-0098	96	6.0134700169990		%	25
Liq-Blank-2	PFAS by Isotope Dilution (36 analytes) (Non-AQ)	PFAS by ID SOP	13C8_PFOSA	SESI-0107	102	6.0134700169990		%	25
Liq-Blank-2	PFAS by Isotope Dilution (36 analytes) (Non-AQ)	PFAS by ID SOP	13C9_PFNA	SESI-0099	97	6.0134700169990		%	25
Liq-Blank-2	PFAS by Isotope Dilution (36 analytes) (Non-AQ)	PFAS by ID SOP	d-EtFOSA	SESI-0108	97	6.0134700169990		%	25
Liq-Blank-2	PFAS by Isotope Dilution (36 analytes) (Non-AQ)	PFAS by ID SOP	d5-EtFOSAA	SESI-0110	108	6.0134700169990		%	25
Liq-Blank-2	PFAS by Isotope Dilution (36 analytes) (Non-AQ)	PFAS by ID SOP	d9-EtFOSE	SESI-0130	99	6.0134700169990		%	25
Liq-Blank-2	PFAS by Isotope Dilution (36 analytes) (Non-AQ)	PFAS by ID SOP	d-MeFOSA	SESI-0109	96	6.0134700169990		%	25
Liq-Blank-2	PFAS by Isotope Dilution (36 analytes) (Non-AQ)	PFAS by ID SOP	d3-MeFOSAA	SESI-0102	104	6.0134700169990		%	25
Liq-Blank-2	PFAS by Isotope Dilution (36 analytes) (Non-AQ)	PFAS by ID SOP	d7-MeFOSE	SESI-0129	96	6.0134700169990		%	25
500-PYLiq-1	PFAS by Isotope Dilution (36 analytes) (Non-AQ)	PFAS by ID SOP	9-chlorohexadecafluoro-3-oxanone-1-sulfonic acid (9Cl-PF3ONS)	756426-58-1	ND	10000		ng/L	25
500-PYLiq-1	PFAS by Isotope Dilution (36 analytes) (Non-AQ)	PFAS by ID SOP	11-chloroeicosafluoro-3-oxaundecane-1-sulfonic acid (11Cl-PF3OUdS	763051-92-9	ND	10000		ng/L	25
500-PYLiq-1	PFAS by Isotope Dilution (36 analytes) (Non-AQ)	PFAS by ID SOP	1H, 1H, 2H, 2H-perfluorodecane sulfonic acid (8:2 FTS)	39108-34-4	ND	10000		ng/L	25
500-PYLiq-1	PFAS by Isotope Dilution (36 analytes) (Non-AQ)	PFAS by ID SOP	1H, 1H, 2H, 2H-perfluorooctane sulfonic acid (6:2 FTS)	27619-97-2	ND	10000		ng/L	25
500-PYLiq-1	PFAS by Isotope Dilution (36 analytes) (Non-AQ)	PFAS by ID SOP	1H,1H,2H,2H-perfluorododecane sulfonic acid (10:2 FTS)	120226-60-0	ND	10000		ng/L	25
500-PYLiq-1	PFAS by Isotope Dilution (36 analytes) (Non-AQ)	PFAS by ID SOP	1H,1H,2H,2H-perfluorohexane sulfonic acid (4:2 FTS)	757124-72-4	ND	10000		ng/L	25
500-PYLiq-1	PFAS by Isotope Dilution (36 analytes) (Non-AQ)	PFAS by ID SOP	Hexafluoropropylene oxide dimer acid (GenX)	13252-13-6	ND	10000		ng/L	25
500-PYLiq-1	PFAS by Isotope Dilution (36 analytes) (Non-AQ)	PFAS by ID SOP	4,8-dioxa-3H-perfluorononanoic acid (ADONA)	919005-14-4	ND	10000		ng/L	25
500-PYLiq-1	PFAS by Isotope Dilution (36 analytes) (Non-AQ)	PFAS by ID SOP	N-ethylperfluoro-1-octanesulfonamide (EtFOSA)	4151-50-2	ND	10000		ng/L	25
500-PYLiq-1	PFAS by Isotope Dilution (36 analytes) (Non-AQ)	PFAS by ID SOP	N-ethylperfluoro-1-octanesulfonamidoacetic acid (EtFOSAA)	2991-50-6	ND	10000		ng/L	25
500-PYLiq-1	PFAS by Isotope Dilution (36 analytes) (Non-AQ)	PFAS by ID SOP	2-N-ethylperfluoro-1-octanesulfonamido-ethanol (EtFOSE)	1691-99-2	45000	10000		ng/L	25
500-PYLiq-1	PFAS by Isotope Dilution (36 analytes) (Non-AQ)	PFAS by ID SOP	N-methylperfluoro-1-octanesulfonamide (MeFOSA)	31506-32-8	ND	20000		ng/L	25
500-PYLiq-1	PFAS by Isotope Dilution (36 analytes) (Non-AQ)	PFAS by ID SOP	N-methylperfluoro-1-octanesulfonamidoacetic acid (MeFOSAA)	2355-31-9	ND	10000		ng/L	25
500-PYLiq-1	PFAS by Isotope Dilution (36 analytes) (Non-AQ)	PFAS by ID SOP	2-N-methylperfluoro-1-octanesulfonamido-ethanol (MeFOSE)	24448-09-7	100000	10000		ng/L	25
500-PYLiq-1	PFAS by Isotope Dilution (36 analytes) (Non-AQ)	PFAS by ID SOP	Perfluoro-1-butanesulfonic acid (PFBS)	375-73-5	ND	5000		ng/L	25
500-PYLiq-1	PFAS by Isotope Dilution (36 analytes) (Non-AQ)	PFAS by ID SOP	Perfluoro-1-decanesulfonic acid (PFDS)	335-77-3	ND	5000		ng/L	25
500-PYLiq-1	PFAS by Isotope Dilution (36 analytes) (Non-AQ)	PFAS by ID SOP	Perfluoro-1-heptanesulfonic acid (PFHpS)	375-92-8	ND	5000		ng/L	25
500-PYLiq-1	PFAS by Isotope Dilution (36 analytes) (Non-AQ)	PFAS by ID SOP	Perfluoro-1-nonanesulfonic acid (PFNS)	68259-12-1	ND	5000		ng/L	25
500-PYLiq-1	PFAS by Isotope Dilution (36 analytes) (Non-AQ)	PFAS by ID SOP	Perfluoro-1-octanesulfonamide (PFOSA)	754-91-6	ND	5000		ng/L	25
500-PYLiq-1	PFAS by Isotope Dilution (36 analytes) (Non-AQ)	PFAS by ID SOP	Perfluoro-1-pentanesulfonic acid (PFPeS)	2706-91-4	ND	5000		ng/L	25
500-PYLiq-1	PFAS by Isotope Dilution (36 analytes) (Non-AQ)	PFAS by ID SOP	Perfluorododecanesulfonic acid (PFDOS)	79780-39-5	ND	10000		ng/L	25
500-PYLiq-1	PFAS by Isotope Dilution (36 analytes) (Non-AQ)	PFAS by ID SOP	Perfluorohexanesulfonic acid (PFHxS)	355-46-4	ND	5000		ng/L	25
500-PYLiq-1	PFAS by Isotope Dilution (36 analytes) (Non-AQ)	PFAS by ID SOP	Perfluoro-n-butanoic acid (PFBA)	375-22-4	27000	5000		ng/L	25
500-PYLiq-1	PFAS by Isotope Dilution (36 analytes) (Non-AQ)	PFAS by ID SOP	Perfluoro-n-decanoic acid (PFDA)	335-76-2	ND	5000		ng/L	25
500-PYLiq-1	PFAS by Isotope Dilution (36 analytes) (Non-AQ)	PFAS by ID SOP	Perfluoro-n-dodecanoic acid (PFDoA)	307-55-1	ND	5000		ng/L	25
500-PYLiq-1	PFAS by Isotope Dilution (36 analytes) (Non-AQ)	PFAS by ID SOP	Perfluoro-n-heptanoic acid (PFHpA)	375-85-9	ND	5000		ng/L	25
500-PYLiq-1	PFAS by Isotope Dilution (36 analytes) (Non-AQ)	PFAS by ID SOP	Perfluoro-n-hexadecanoic acid (PFHxDA)	67905-19-5	ND	10000		ng/L	25
500-PYLiq-1	PFAS by Isotope Dilution (36 analytes) (Non-AQ)	PFAS by ID SOP	Perfluoro-n-hexanoic acid (PFHxA)	307-24-4	ND	5000		ng/L	25
500-PYLiq-1	PFAS by Isotope Dilution (36 analytes) (Non-AQ)	PFAS by ID SOP	Perfluoro-n-nonanoic acid (PFNA)	375-95-1	ND	5000		ng/L	25
500-PYLiq-1	PFAS by Isotope Dilution (36 analytes) (Non-AQ)	PFAS by ID SOP	Perfluoro-n-octadecanoic acid (PFODA)	16517-11-6	ND	10000		ng/L	25
500-PYLiq-1	PFAS by Isotope Dilution (36 analytes) (Non-AQ)	PFAS by ID SOP	Perfluoro-n-octanoic acid (PFOA)	335-67-1	ND	5000		ng/L	25
500-PYLiq-1	PFAS by Isotope Dilution (36 analytes) (Non-AQ)	PFAS by ID SOP	Perfluoro-n-pentanoic acid (PFPeA)	2706-90-3	ND	5000		ng/L	25
500-PYLiq-1	PFAS by Isotope Dilution (36 analytes) (Non-AQ)	PFAS by ID SOP	Perfluoro-n-tetradecanoic acid (PFTeDA)	376-06-7	ND	5000		ng/L	25
500-PYLiq-1	PFAS by Isotope Dilution (36 analytes) (Non-AQ)	PFAS by ID SOP	Perfluoro-n-tridecanoic acid (PFTrDA)	72629-94-8	ND	5000		ng/L	25
500-PYLiq-1	PFAS by Isotope Dilution (36 analytes) (Non-AQ)	PFAS by ID SOP	Perfluoro-n-undecanoic acid (PFUdA)	2058-94-8	ND	5000		ng/L	25
500-PYLiq-1	PFAS by Isotope Dilution (36 analytes) (Non-AQ)	PFAS by ID SOP	Perfluorooctanesulfonic acid (PFOS)	1763-23-1	ND	5000		ng/L	25
500-PYLiq-1	PFAS by Isotope Dilution (36 analytes) (Non-AQ)	PFAS by ID SOP	13C2_4:2FTS	SESI-0104	334	6.0134700169990		%	25
500-PYLiq-1	PFAS by Isotope Dilution (36 analytes) (Non-AQ)	PFAS by ID SOP	13C2_6:2FTS	SESI-0105	267	6.0134700169990		%	25
500-PYLiq-1	PFAS by Isotope Dilution (36 analytes) (Non-AQ)	PFAS by ID SOP	13C2_8:2FTS	SESI-0106	275	6.0134700169990		%	25
500-PYLiq-1	PFAS by Isotope Dilution (36 analytes) (Non-AQ)	PFAS by ID SOP	13C2_PFDoA	SESI-0118	130	6.0134700169990		%	25
500-PYLiq-1	PFAS by Isotope Dilution (36 analytes) (Non-AQ)	PFAS by ID SOP	13C2_PFHxDA	SESI-0103	172	6.0134700169990		%	25
500-PYLiq-1	PFAS by Isotope Dilution (36 analytes) (Non-AQ)	PFAS by ID SOP	13C2_PFTeDA	SESI-0119	138	6.0134700169990		%	25
500-PYLiq-1	PFAS by Isotope Dilution (36 analytes) (Non-AQ)	PFAS by ID SOP	13C3_PFBS	SESI-0116	91	6.0134700169990		%	25
500-PYLiq-1	PFAS by Isotope Dilution (36 analytes) (Non-AQ)	PFAS by ID SOP	13C3_PFHxS	SESI-0096	75	6.0134700169990		%	25
500-PYLiq-1	PFAS by Isotope Dilution (36 analytes) (Non-AQ)	PFAS by ID SOP	13C3-HFPO-DA	SESI-0121	60	6.0134700169990		%	25
500-PYLiq-1	PFAS by Isotope Dilution (36 analytes) (Non-AQ)	PFAS by ID SOP	13C4_PFBA	SESI-0111	49	6.0134700169990		%	25
500-PYLiq-1	PFAS by Isotope Dilution (36 analytes) (Non-AQ)	PFAS by ID SOP	13C4_PFHpA	SESI-0114	67	6.0134700169990		%	25
500-PYLiq-1	PFAS by Isotope Dilution (36 analytes) (Non-AQ)	PFAS by ID SOP	13C5_PFHxA	SESI-0113	70	6.0134700169990		%	25
500-PYLiq-1	PFAS by Isotope Dilution (36 analytes) (Non-AQ)	PFAS by ID SOP	13C5_PFPeA	SESI-0112	61	6.0134700169990		%	25
500-PYLiq-1	PFAS by Isotope Dilution (36 analytes) (Non-AQ)	PFAS by ID SOP	13C6_PFDA	SESI-0115	90	6.0134700169990		%	25
500-PYLiq-1	PFAS by Isotope Dilution (36 analytes) (Non-AQ)	PFAS by ID SOP	13C7_PFUdA	SESI-0117	110	6.0134700169990		%	25
500-PYLiq-1	PFAS by Isotope Dilution (36 analytes) (Non-AQ)	PFAS by ID SOP	13C8_PFOA	SESI-0097	74	6.0134700169990		%	25
500-PYLiq-1	PFAS by Isotope Dilution (36 analytes) (Non-AQ)	PFAS by ID SOP	13C8_PFOS	SESI-0098	89	6.0134700169990		%	25
500-PYLiq-1	PFAS by Isotope Dilution (36 analytes) (Non-AQ)	PFAS by ID SOP	13C8_PFOSA	SESI-0107	69	6.0134700169990		%	25
500-PYLiq-1	PFAS by Isotope Dilution (36 analytes) (Non-AQ)	PFAS by ID SOP	13C9_PFNA	SESI-0099	88	6.0134700169990		%	25
500-PYLiq-1	PFAS by Isotope Dilution (36 analytes) (Non-AQ)	PFAS by ID SOP	d-EtFOSA	SESI-0108	33	6.0134700169990		%	25
500-PYLiq-1	PFAS by Isotope Dilution (36 analytes) (Non-AQ)	PFAS by ID SOP	d5-EtFOSAA	SESI-0110	161	6.0134700169990		%	25
500-PYLiq-1	PFAS by Isotope Dilution (36 analytes) (Non-AQ)	PFAS by ID SOP	d9-EtFOSE	SESI-0130	25	6.0134700169990		%	25
500-PYLiq-1	PFAS by Isotope Dilution (36 analytes) (Non-AQ)	PFAS by ID SOP	d-MeFOSA	SESI-0109	46	6.0134700169990		%	25
500-PYLiq-1	PFAS by Isotope Dilution (36 analytes) (Non-AQ)	PFAS by ID SOP	d3-MeFOSAA	SESI-0102	139	6.0134700169990		%	25
500-PYLiq-1	PFAS by Isotope Dilution (36 analytes) (Non-AQ)	PFAS by ID SOP	d7-MeFOSE	SESI-0129	39	6.0134700169990		%	25
500-PYLiq-2	PFAS by Isotope Dilution (36 analytes) (Non-AQ)	PFAS by ID SOP	9-chlorohexadecafluoro-3-oxanone-1-sulfonic acid (9Cl-PF3ONS)	756426-58-1	ND	10000		ng/L	25
500-PYLiq-2	PFAS by Isotope Dilution (36 analytes) (Non-AQ)	PFAS by ID SOP	11-chloroeicosafluoro-3-oxaundecane-1-sulfonic acid (11Cl-PF3OUdS	763051-92-9	ND	10000		ng/L	25
500-PYLiq-2	PFAS by Isotope Dilution (36 analytes) (Non-AQ)	PFAS by ID SOP	1H, 1H, 2H, 2H-perfluorodecane sulfonic acid (8:2 FTS)	39108-34-4	ND	10000		ng/L	25
500-PYLiq-2	PFAS by Isotope Dilution (36 analytes) (Non-AQ)	PFAS by ID SOP	1H, 1H, 2H, 2H-perfluorooctane sulfonic acid (6:2 FTS)	27619-97-2	ND	10000		ng/L	25
500-PYLiq-2	PFAS by Isotope Dilution (36 analytes) (Non-AQ)	PFAS by ID SOP	1H,1H,2H,2H-perfluorododecane sulfonic acid (10:2 FTS)	120226-60-0	ND	10000		ng/L	25
500-PYLiq-2	PFAS by Isotope Dilution (36 analytes) (Non-AQ)	PFAS by ID SOP	1H,1H,2H,2H-perfluorohexane sulfonic acid (4:2 FTS)	757124-72-4	ND	10000		ng/L	25
500-PYLiq-2	PFAS by Isotope Dilution (36 analytes) (Non-AQ)	PFAS by ID SOP	Hexafluoropropylene oxide dimer acid (GenX)	13252-13-6	ND	10000		ng/L	25
500-PYLiq-2	PFAS by Isotope Dilution (36 analytes) (Non-AQ)	PFAS by ID SOP	4,8-dioxa-3H-perfluorononanoic acid (ADONA)	919005-14-4	ND	10000		ng/L	25
500-PYLiq-2	PFAS by Isotope Dilution (36 analytes) (Non-AQ)	PFAS by ID SOP	N-ethylperfluoro-1-octanesulfonamide (EtFOSA)	4151-50-2	ND	10000		ng/L	25
500-PYLiq-2	PFAS by Isotope Dilution (36 analytes) (Non-AQ)	PFAS by ID SOP	N-ethylperfluoro-1-octanesulfonamidoacetic acid (EtFOSAA)	2991-50-6	ND	10000		ng/L	25
500-PYLiq-2	PFAS by Isotope Dilution (36 analytes) (Non-AQ)	PFAS by ID SOP	2-N-ethylperfluoro-1-octanesulfonamido-ethanol (EtFOSE)	1691-99-2	18000	10000		ng/L	25
500-PYLiq-2	PFAS by Isotope Dilution (36 analytes) (Non-AQ)	PFAS by ID SOP	N-methylperfluoro-1-octanesulfonamide (MeFOSA)	31506-32-8	ND	20000		ng/L	25
500-PYLiq-2	PFAS by Isotope Dilution (36 analytes) (Non-AQ)	PFAS by ID SOP	N-methylperfluoro-1-octanesulfonamidoacetic acid (MeFOSAA)	2355-31-9	ND	10000		ng/L	25
500-PYLiq-2	PFAS by Isotope Dilution (36 analytes) (Non-AQ)	PFAS by ID SOP	2-N-methylperfluoro-1-octanesulfonamido-ethanol (MeFOSE)	24448-09-7	62000	10000		ng/L	25
500-PYLiq-2	PFAS by Isotope Dilution (36 analytes) (Non-AQ)	PFAS by ID SOP	Perfluoro-1-butanesulfonic acid (PFBS)	375-73-5	ND	5000		ng/L	25
500-PYLiq-2	PFAS by Isotope Dilution (36 analytes) (Non-AQ)	PFAS by ID SOP	Perfluoro-1-decanesulfonic acid (PFDS)	335-77-3	ND	5000		ng/L	25
500-PYLiq-2	PFAS by Isotope Dilution (36 analytes) (Non-AQ)	PFAS by ID SOP	Perfluoro-1-heptanesulfonic acid (PFHpS)	375-92-8	ND	5000		ng/L	25
500-PYLiq-2	PFAS by Isotope Dilution (36 analytes) (Non-AQ)	PFAS by ID SOP	Perfluoro-1-nonanesulfonic acid (PFNS)	68259-12-1	ND	5000		ng/L	25
500-PYLiq-2	PFAS by Isotope Dilution (36 analytes) (Non-AQ)	PFAS by ID SOP	Perfluoro-1-octanesulfonamide (PFOSA)	754-91-6	ND	5000		ng/L	25
500-PYLiq-2	PFAS by Isotope Dilution (36 analytes) (Non-AQ)	PFAS by ID SOP	Perfluoro-1-pentanesulfonic acid (PFPeS)	2706-91-4	ND	5000		ng/L	25
500-PYLiq-2	PFAS by Isotope Dilution (36 analytes) (Non-AQ)	PFAS by ID SOP	Perfluorododecanesulfonic acid (PFDOS)	79780-39-5	ND	10000		ng/L	25
500-PYLiq-2	PFAS by Isotope Dilution (36 analytes) (Non-AQ)	PFAS by ID SOP	Perfluorohexanesulfonic acid (PFHxS)	355-46-4	ND	5000		ng/L	25
500-PYLiq-2	PFAS by Isotope Dilution (36 analytes) (Non-AQ)	PFAS by ID SOP	Perfluoro-n-butanoic acid (PFBA)	375-22-4	19000	5000		ng/L	25
500-PYLiq-2	PFAS by Isotope Dilution (36 analytes) (Non-AQ)	PFAS by ID SOP	Perfluoro-n-decanoic acid (PFDA)	335-76-2	ND	5000		ng/L	25
500-PYLiq-2	PFAS by Isotope Dilution (36 analytes) (Non-AQ)	PFAS by ID SOP	Perfluoro-n-dodecanoic acid (PFDoA)	307-55-1	ND	5000		ng/L	25
500-PYLiq-2	PFAS by Isotope Dilution (36 analytes) (Non-AQ)	PFAS by ID SOP	Perfluoro-n-heptanoic acid (PFHpA)	375-85-9	ND	5000		ng/L	25
500-PYLiq-2	PFAS by Isotope Dilution (36 analytes) (Non-AQ)	PFAS by ID SOP	Perfluoro-n-hexadecanoic acid (PFHxDA)	67905-19-5	ND	10000		ng/L	25
500-PYLiq-2	PFAS by Isotope Dilution (36 analytes) (Non-AQ)	PFAS by ID SOP	Perfluoro-n-hexanoic acid (PFHxA)	307-24-4	ND	5000		ng/L	25
500-PYLiq-2	PFAS by Isotope Dilution (36 analytes) (Non-AQ)	PFAS by ID SOP	Perfluoro-n-nonanoic acid (PFNA)	375-95-1	ND	5000		ng/L	25
500-PYLiq-2	PFAS by Isotope Dilution (36 analytes) (Non-AQ)	PFAS by ID SOP	Perfluoro-n-octadecanoic acid (PFODA)	16517-11-6	ND	10000		ng/L	25
500-PYLiq-2	PFAS by Isotope Dilution (36 analytes) (Non-AQ)	PFAS by ID SOP	Perfluoro-n-octanoic acid (PFOA)	335-67-1	ND	5000		ng/L	25
500-PYLiq-2	PFAS by Isotope Dilution (36 analytes) (Non-AQ)	PFAS by ID SOP	Perfluoro-n-pentanoic acid (PFPeA)	2706-90-3	ND	5000		ng/L	25
500-PYLiq-2	PFAS by Isotope Dilution (36 analytes) (Non-AQ)	PFAS by ID SOP	Perfluoro-n-tetradecanoic acid (PFTeDA)	376-06-7	ND	5000		ng/L	25
500-PYLiq-2	PFAS by Isotope Dilution (36 analytes) (Non-AQ)	PFAS by ID SOP	Perfluoro-n-tridecanoic acid (PFTrDA)	72629-94-8	ND	5000		ng/L	25
500-PYLiq-2	PFAS by Isotope Dilution (36 analytes) (Non-AQ)	PFAS by ID SOP	Perfluoro-n-undecanoic acid (PFUdA)	2058-94-8	ND	5000		ng/L	25
500-PYLiq-2	PFAS by Isotope Dilution (36 analytes) (Non-AQ)	PFAS by ID SOP	Perfluorooctanesulfonic acid (PFOS)	1763-23-1	ND	5000		ng/L	25
500-PYLiq-2	PFAS by Isotope Dilution (36 analytes) (Non-AQ)	PFAS by ID SOP	13C2_4:2FTS	SESI-0104	375	6.0134700169990		%	25
500-PYLiq-2	PFAS by Isotope Dilution (36 analytes) (Non-AQ)	PFAS by ID SOP	13C2_6:2FTS	SESI-0105	275	6.0134700169990		%	25
500-PYLiq-2	PFAS by Isotope Dilution (36 analytes) (Non-AQ)	PFAS by ID SOP	13C2_8:2FTS	SESI-0106	295	6.0134700169990		%	25
500-PYLiq-2	PFAS by Isotope Dilution (36 analytes) (Non-AQ)	PFAS by ID SOP	13C2_PFDoA	SESI-0118	146	6.0134700169990		%	25
500-PYLiq-2	PFAS by Isotope Dilution (36 analytes) (Non-AQ)	PFAS by ID SOP	13C2_PFHxDA	SESI-0103	186	6.0134700169990		%	25
500-PYLiq-2	PFAS by Isotope Dilution (36 analytes) (Non-AQ)	PFAS by ID SOP	13C2_PFTeDA	SESI-0119	174	6.0134700169990		%	25
500-PYLiq-2	PFAS by Isotope Dilution (36 analytes) (Non-AQ)	PFAS by ID SOP	13C3_PFBS	SESI-0116	102	6.0134700169990		%	25
500-PYLiq-2	PFAS by Isotope Dilution (36 analytes) (Non-AQ)	PFAS by ID SOP	13C3_PFHxS	SESI-0096	86	6.0134700169990		%	25
500-PYLiq-2	PFAS by Isotope Dilution (36 analytes) (Non-AQ)	PFAS by ID SOP	13C3-HFPO-DA	SESI-0121	68	6.0134700169990		%	25
500-PYLiq-2	PFAS by Isotope Dilution (36 analytes) (Non-AQ)	PFAS by ID SOP	13C4_PFBA	SESI-0111	56	6.0134700169990		%	25
500-PYLiq-2	PFAS by Isotope Dilution (36 analytes) (Non-AQ)	PFAS by ID SOP	13C4_PFHpA	SESI-0114	75	6.0134700169990		%	25
500-PYLiq-2	PFAS by Isotope Dilution (36 analytes) (Non-AQ)	PFAS by ID SOP	13C5_PFHxA	SESI-0113	77	6.0134700169990		%	25
500-PYLiq-2	PFAS by Isotope Dilution (36 analytes) (Non-AQ)	PFAS by ID SOP	13C5_PFPeA	SESI-0112	67	6.0134700169990		%	25
500-PYLiq-2	PFAS by Isotope Dilution (36 analytes) (Non-AQ)	PFAS by ID SOP	13C6_PFDA	SESI-0115	102	6.0134700169990		%	25
500-PYLiq-2	PFAS by Isotope Dilution (36 analytes) (Non-AQ)	PFAS by ID SOP	13C7_PFUdA	SESI-0117	123	6.0134700169990		%	25
500-PYLiq-2	PFAS by Isotope Dilution (36 analytes) (Non-AQ)	PFAS by ID SOP	13C8_PFOA	SESI-0097	80	6.0134700169990		%	25
500-PYLiq-2	PFAS by Isotope Dilution (36 analytes) (Non-AQ)	PFAS by ID SOP	13C8_PFOS	SESI-0098	94	6.0134700169990		%	25
500-PYLiq-2	PFAS by Isotope Dilution (36 analytes) (Non-AQ)	PFAS by ID SOP	13C8_PFOSA	SESI-0107	80	6.0134700169990		%	25
500-PYLiq-2	PFAS by Isotope Dilution (36 analytes) (Non-AQ)	PFAS by ID SOP	13C9_PFNA	SESI-0099	99	6.0134700169990		%	25
500-PYLiq-2	PFAS by Isotope Dilution (36 analytes) (Non-AQ)	PFAS by ID SOP	d-EtFOSA	SESI-0108	46	6.0134700169990		%	25
500-PYLiq-2	PFAS by Isotope Dilution (36 analytes) (Non-AQ)	PFAS by ID SOP	d5-EtFOSAA	SESI-0110	167	6.0134700169990		%	25
500-PYLiq-2	PFAS by Isotope Dilution (36 analytes) (Non-AQ)	PFAS by ID SOP	d9-EtFOSE	SESI-0130	35	6.0134700169990		%	25
500-PYLiq-2	PFAS by Isotope Dilution (36 analytes) (Non-AQ)	PFAS by ID SOP	d-MeFOSA	SESI-0109	55	6.0134700169990		%	25
500-PYLiq-2	PFAS by Isotope Dilution (36 analytes) (Non-AQ)	PFAS by ID SOP	d3-MeFOSAA	SESI-0102	156	6.0134700169990		%	25
500-PYLiq-2	PFAS by Isotope Dilution (36 analytes) (Non-AQ)	PFAS by ID SOP	d7-MeFOSE	SESI-0129	41	6.0134700169990		%	25
500-PYLiq-3	PFAS by Isotope Dilution (36 analytes) (Non-AQ)	PFAS by ID SOP	9-chlorohexadecafluoro-3-oxanone-1-sulfonic acid (9Cl-PF3ONS)	756426-58-1	ND	10000		ng/L	25
500-PYLiq-3	PFAS by Isotope Dilution (36 analytes) (Non-AQ)	PFAS by ID SOP	11-chloroeicosafluoro-3-oxaundecane-1-sulfonic acid (11Cl-PF3OUdS	763051-92-9	ND	10000		ng/L	25
500-PYLiq-3	PFAS by Isotope Dilution (36 analytes) (Non-AQ)	PFAS by ID SOP	1H, 1H, 2H, 2H-perfluorodecane sulfonic acid (8:2 FTS)	39108-34-4	ND	10000		ng/L	25
500-PYLiq-3	PFAS by Isotope Dilution (36 analytes) (Non-AQ)	PFAS by ID SOP	1H, 1H, 2H, 2H-perfluorooctane sulfonic acid (6:2 FTS)	27619-97-2	ND	10000		ng/L	25
500-PYLiq-3	PFAS by Isotope Dilution (36 analytes) (Non-AQ)	PFAS by ID SOP	1H,1H,2H,2H-perfluorododecane sulfonic acid (10:2 FTS)	120226-60-0	ND	10000		ng/L	25
500-PYLiq-3	PFAS by Isotope Dilution (36 analytes) (Non-AQ)	PFAS by ID SOP	1H,1H,2H,2H-perfluorohexane sulfonic acid (4:2 FTS)	757124-72-4	ND	10000		ng/L	25
500-PYLiq-3	PFAS by Isotope Dilution (36 analytes) (Non-AQ)	PFAS by ID SOP	Hexafluoropropylene oxide dimer acid (GenX)	13252-13-6	ND	10000		ng/L	25
500-PYLiq-3	PFAS by Isotope Dilution (36 analytes) (Non-AQ)	PFAS by ID SOP	4,8-dioxa-3H-perfluorononanoic acid (ADONA)	919005-14-4	ND	10000		ng/L	25
500-PYLiq-3	PFAS by Isotope Dilution (36 analytes) (Non-AQ)	PFAS by ID SOP	N-ethylperfluoro-1-octanesulfonamide (EtFOSA)	4151-50-2	ND	10000		ng/L	25
500-PYLiq-3	PFAS by Isotope Dilution (36 analytes) (Non-AQ)	PFAS by ID SOP	N-ethylperfluoro-1-octanesulfonamidoacetic acid (EtFOSAA)	2991-50-6	ND	10000		ng/L	25
500-PYLiq-3	PFAS by Isotope Dilution (36 analytes) (Non-AQ)	PFAS by ID SOP	2-N-ethylperfluoro-1-octanesulfonamido-ethanol (EtFOSE)	1691-99-2	35000	10000		ng/L	25
500-PYLiq-3	PFAS by Isotope Dilution (36 analytes) (Non-AQ)	PFAS by ID SOP	N-methylperfluoro-1-octanesulfonamide (MeFOSA)	31506-32-8	ND	20000		ng/L	25
500-PYLiq-3	PFAS by Isotope Dilution (36 analytes) (Non-AQ)	PFAS by ID SOP	N-methylperfluoro-1-octanesulfonamidoacetic acid (MeFOSAA)	2355-31-9	ND	10000		ng/L	25
500-PYLiq-3	PFAS by Isotope Dilution (36 analytes) (Non-AQ)	PFAS by ID SOP	2-N-methylperfluoro-1-octanesulfonamido-ethanol (MeFOSE)	24448-09-7	38000	10000		ng/L	25
500-PYLiq-3	PFAS by Isotope Dilution (36 analytes) (Non-AQ)	PFAS by ID SOP	Perfluoro-1-butanesulfonic acid (PFBS)	375-73-5	ND	5000		ng/L	25
500-PYLiq-3	PFAS by Isotope Dilution (36 analytes) (Non-AQ)	PFAS by ID SOP	Perfluoro-1-decanesulfonic acid (PFDS)	335-77-3	ND	5000		ng/L	25
500-PYLiq-3	PFAS by Isotope Dilution (36 analytes) (Non-AQ)	PFAS by ID SOP	Perfluoro-1-heptanesulfonic acid (PFHpS)	375-92-8	ND	5000		ng/L	25
500-PYLiq-3	PFAS by Isotope Dilution (36 analytes) (Non-AQ)	PFAS by ID SOP	Perfluoro-1-nonanesulfonic acid (PFNS)	68259-12-1	ND	5000		ng/L	25
500-PYLiq-3	PFAS by Isotope Dilution (36 analytes) (Non-AQ)	PFAS by ID SOP	Perfluoro-1-octanesulfonamide (PFOSA)	754-91-6	ND	5000		ng/L	25
500-PYLiq-3	PFAS by Isotope Dilution (36 analytes) (Non-AQ)	PFAS by ID SOP	Perfluoro-1-pentanesulfonic acid (PFPeS)	2706-91-4	ND	5000		ng/L	25
500-PYLiq-3	PFAS by Isotope Dilution (36 analytes) (Non-AQ)	PFAS by ID SOP	Perfluorododecanesulfonic acid (PFDOS)	79780-39-5	ND	10000		ng/L	25
500-PYLiq-3	PFAS by Isotope Dilution (36 analytes) (Non-AQ)	PFAS by ID SOP	Perfluorohexanesulfonic acid (PFHxS)	355-46-4	ND	5000		ng/L	25
500-PYLiq-3	PFAS by Isotope Dilution (36 analytes) (Non-AQ)	PFAS by ID SOP	Perfluoro-n-butanoic acid (PFBA)	375-22-4	13000	5000		ng/L	25
500-PYLiq-3	PFAS by Isotope Dilution (36 analytes) (Non-AQ)	PFAS by ID SOP	Perfluoro-n-decanoic acid (PFDA)	335-76-2	ND	5000		ng/L	25
500-PYLiq-3	PFAS by Isotope Dilution (36 analytes) (Non-AQ)	PFAS by ID SOP	Perfluoro-n-dodecanoic acid (PFDoA)	307-55-1	ND	5000		ng/L	25
500-PYLiq-3	PFAS by Isotope Dilution (36 analytes) (Non-AQ)	PFAS by ID SOP	Perfluoro-n-heptanoic acid (PFHpA)	375-85-9	ND	5000		ng/L	25
500-PYLiq-3	PFAS by Isotope Dilution (36 analytes) (Non-AQ)	PFAS by ID SOP	Perfluoro-n-hexadecanoic acid (PFHxDA)	67905-19-5	ND	10000		ng/L	25
500-PYLiq-3	PFAS by Isotope Dilution (36 analytes) (Non-AQ)	PFAS by ID SOP	Perfluoro-n-hexanoic acid (PFHxA)	307-24-4	ND	5000		ng/L	25
500-PYLiq-3	PFAS by Isotope Dilution (36 analytes) (Non-AQ)	PFAS by ID SOP	Perfluoro-n-nonanoic acid (PFNA)	375-95-1	ND	5000		ng/L	25
500-PYLiq-3	PFAS by Isotope Dilution (36 analytes) (Non-AQ)	PFAS by ID SOP	Perfluoro-n-octadecanoic acid (PFODA)	16517-11-6	ND	10000		ng/L	25
500-PYLiq-3	PFAS by Isotope Dilution (36 analytes) (Non-AQ)	PFAS by ID SOP	Perfluoro-n-octanoic acid (PFOA)	335-67-1	ND	5000		ng/L	25
500-PYLiq-3	PFAS by Isotope Dilution (36 analytes) (Non-AQ)	PFAS by ID SOP	Perfluoro-n-pentanoic acid (PFPeA)	2706-90-3	ND	5000		ng/L	25
500-PYLiq-3	PFAS by Isotope Dilution (36 analytes) (Non-AQ)	PFAS by ID SOP	Perfluoro-n-tetradecanoic acid (PFTeDA)	376-06-7	ND	5000		ng/L	25
500-PYLiq-3	PFAS by Isotope Dilution (36 analytes) (Non-AQ)	PFAS by ID SOP	Perfluoro-n-tridecanoic acid (PFTrDA)	72629-94-8	ND	5000		ng/L	25
500-PYLiq-3	PFAS by Isotope Dilution (36 analytes) (Non-AQ)	PFAS by ID SOP	Perfluoro-n-undecanoic acid (PFUdA)	2058-94-8	ND	5000		ng/L	25
500-PYLiq-3	PFAS by Isotope Dilution (36 analytes) (Non-AQ)	PFAS by ID SOP	Perfluorooctanesulfonic acid (PFOS)	1763-23-1	ND	5000		ng/L	25
500-PYLiq-3	PFAS by Isotope Dilution (36 analytes) (Non-AQ)	PFAS by ID SOP	13C2_4:2FTS	SESI-0104	666	6.0134700169990		%	25
500-PYLiq-3	PFAS by Isotope Dilution (36 analytes) (Non-AQ)	PFAS by ID SOP	13C2_6:2FTS	SESI-0105	471	6.0134700169990		%	25
500-PYLiq-3	PFAS by Isotope Dilution (36 analytes) (Non-AQ)	PFAS by ID SOP	13C2_8:2FTS	SESI-0106	539	6.0134700169990		%	25
500-PYLiq-3	PFAS by Isotope Dilution (36 analytes) (Non-AQ)	PFAS by ID SOP	13C2_PFDoA	SESI-0118	251	6.0134700169990		%	25
500-PYLiq-3	PFAS by Isotope Dilution (36 analytes) (Non-AQ)	PFAS by ID SOP	13C2_PFHxDA	SESI-0103	345	6.0134700169990		%	25
500-PYLiq-3	PFAS by Isotope Dilution (36 analytes) (Non-AQ)	PFAS by ID SOP	13C2_PFTeDA	SESI-0119	288	6.0134700169990		%	25
500-PYLiq-3	PFAS by Isotope Dilution (36 analytes) (Non-AQ)	PFAS by ID SOP	13C3_PFBS	SESI-0116	180	6.0134700169990		%	25
500-PYLiq-3	PFAS by Isotope Dilution (36 analytes) (Non-AQ)	PFAS by ID SOP	13C3_PFHxS	SESI-0096	155	6.0134700169990		%	25
500-PYLiq-3	PFAS by Isotope Dilution (36 analytes) (Non-AQ)	PFAS by ID SOP	13C3-HFPO-DA	SESI-0121	117	6.0134700169990		%	25
500-PYLiq-3	PFAS by Isotope Dilution (36 analytes) (Non-AQ)	PFAS by ID SOP	13C4_PFBA	SESI-0111	97	6.0134700169990		%	25
500-PYLiq-3	PFAS by Isotope Dilution (36 analytes) (Non-AQ)	PFAS by ID SOP	13C4_PFHpA	SESI-0114	128	6.0134700169990		%	25
500-PYLiq-3	PFAS by Isotope Dilution (36 analytes) (Non-AQ)	PFAS by ID SOP	13C5_PFHxA	SESI-0113	132	6.0134700169990		%	25
500-PYLiq-3	PFAS by Isotope Dilution (36 analytes) (Non-AQ)	PFAS by ID SOP	13C5_PFPeA	SESI-0112	116	6.0134700169990		%	25
500-PYLiq-3	PFAS by Isotope Dilution (36 analytes) (Non-AQ)	PFAS by ID SOP	13C6_PFDA	SESI-0115	175	6.0134700169990		%	25
500-PYLiq-3	PFAS by Isotope Dilution (36 analytes) (Non-AQ)	PFAS by ID SOP	13C7_PFUdA	SESI-0117	216	6.0134700169990		%	25
500-PYLiq-3	PFAS by Isotope Dilution (36 analytes) (Non-AQ)	PFAS by ID SOP	13C8_PFOA	SESI-0097	140	6.0134700169990		%	25
500-PYLiq-3	PFAS by Isotope Dilution (36 analytes) (Non-AQ)	PFAS by ID SOP	13C8_PFOS	SESI-0098	168	6.0134700169990		%	25
500-PYLiq-3	PFAS by Isotope Dilution (36 analytes) (Non-AQ)	PFAS by ID SOP	13C8_PFOSA	SESI-0107	140	6.0134700169990		%	25
500-PYLiq-3	PFAS by Isotope Dilution (36 analytes) (Non-AQ)	PFAS by ID SOP	13C9_PFNA	SESI-0099	171	6.0134700169990		%	25
500-PYLiq-3	PFAS by Isotope Dilution (36 analytes) (Non-AQ)	PFAS by ID SOP	d-EtFOSA	SESI-0108	65	6.0134700169990		%	25
500-PYLiq-3	PFAS by Isotope Dilution (36 analytes) (Non-AQ)	PFAS by ID SOP	d5-EtFOSAA	SESI-0110	317	6.0134700169990		%	25
500-PYLiq-3	PFAS by Isotope Dilution (36 analytes) (Non-AQ)	PFAS by ID SOP	d9-EtFOSE	SESI-0130	49	6.0134700169990		%	25
500-PYLiq-3	PFAS by Isotope Dilution (36 analytes) (Non-AQ)	PFAS by ID SOP	d-MeFOSA	SESI-0109	90	6.0134700169990		%	25
500-PYLiq-3	PFAS by Isotope Dilution (36 analytes) (Non-AQ)	PFAS by ID SOP	d3-MeFOSAA	SESI-0102	271	6.0134700169990		%	25
500-PYLiq-3	PFAS by Isotope Dilution (36 analytes) (Non-AQ)	PFAS by ID SOP	d7-MeFOSE	SESI-0129	68	6.0134700169990		%	25
800-PYLiq-1	PFAS by Isotope Dilution (36 analytes) (Non-AQ)	PFAS by ID SOP	9-chlorohexadecafluoro-3-oxanone-1-sulfonic acid (9Cl-PF3ONS)	756426-58-1	ND	10000		ng/L	25
800-PYLiq-1	PFAS by Isotope Dilution (36 analytes) (Non-AQ)	PFAS by ID SOP	11-chloroeicosafluoro-3-oxaundecane-1-sulfonic acid (11Cl-PF3OUdS	763051-92-9	ND	10000		ng/L	25
800-PYLiq-1	PFAS by Isotope Dilution (36 analytes) (Non-AQ)	PFAS by ID SOP	1H, 1H, 2H, 2H-perfluorodecane sulfonic acid (8:2 FTS)	39108-34-4	ND	10000		ng/L	25
800-PYLiq-1	PFAS by Isotope Dilution (36 analytes) (Non-AQ)	PFAS by ID SOP	1H, 1H, 2H, 2H-perfluorooctane sulfonic acid (6:2 FTS)	27619-97-2	ND	10000		ng/L	25
800-PYLiq-1	PFAS by Isotope Dilution (36 analytes) (Non-AQ)	PFAS by ID SOP	1H,1H,2H,2H-perfluorododecane sulfonic acid (10:2 FTS)	120226-60-0	ND	10000		ng/L	25
800-PYLiq-1	PFAS by Isotope Dilution (36 analytes) (Non-AQ)	PFAS by ID SOP	1H,1H,2H,2H-perfluorohexane sulfonic acid (4:2 FTS)	757124-72-4	ND	10000		ng/L	25
800-PYLiq-1	PFAS by Isotope Dilution (36 analytes) (Non-AQ)	PFAS by ID SOP	Hexafluoropropylene oxide dimer acid (GenX)	13252-13-6	ND	10000		ng/L	25
800-PYLiq-1	PFAS by Isotope Dilution (36 analytes) (Non-AQ)	PFAS by ID SOP	4,8-dioxa-3H-perfluorononanoic acid (ADONA)	919005-14-4	ND	10000		ng/L	25
800-PYLiq-1	PFAS by Isotope Dilution (36 analytes) (Non-AQ)	PFAS by ID SOP	N-ethylperfluoro-1-octanesulfonamide (EtFOSA)	4151-50-2	ND	10000		ng/L	25
800-PYLiq-1	PFAS by Isotope Dilution (36 analytes) (Non-AQ)	PFAS by ID SOP	N-ethylperfluoro-1-octanesulfonamidoacetic acid (EtFOSAA)	2991-50-6	ND	10000		ng/L	25
800-PYLiq-1	PFAS by Isotope Dilution (36 analytes) (Non-AQ)	PFAS by ID SOP	2-N-ethylperfluoro-1-octanesulfonamido-ethanol (EtFOSE)	1691-99-2	44000	10000		ng/L	25
800-PYLiq-1	PFAS by Isotope Dilution (36 analytes) (Non-AQ)	PFAS by ID SOP	N-methylperfluoro-1-octanesulfonamide (MeFOSA)	31506-32-8	ND	20000		ng/L	25
800-PYLiq-1	PFAS by Isotope Dilution (36 analytes) (Non-AQ)	PFAS by ID SOP	N-methylperfluoro-1-octanesulfonamidoacetic acid (MeFOSAA)	2355-31-9	ND	10000		ng/L	25
800-PYLiq-1	PFAS by Isotope Dilution (36 analytes) (Non-AQ)	PFAS by ID SOP	2-N-methylperfluoro-1-octanesulfonamido-ethanol (MeFOSE)	24448-09-7	98000	10000		ng/L	25
800-PYLiq-1	PFAS by Isotope Dilution (36 analytes) (Non-AQ)	PFAS by ID SOP	Perfluoro-1-butanesulfonic acid (PFBS)	375-73-5	ND	5000		ng/L	25
800-PYLiq-1	PFAS by Isotope Dilution (36 analytes) (Non-AQ)	PFAS by ID SOP	Perfluoro-1-decanesulfonic acid (PFDS)	335-77-3	ND	5000		ng/L	25
800-PYLiq-1	PFAS by Isotope Dilution (36 analytes) (Non-AQ)	PFAS by ID SOP	Perfluoro-1-heptanesulfonic acid (PFHpS)	375-92-8	ND	5000		ng/L	25
800-PYLiq-1	PFAS by Isotope Dilution (36 analytes) (Non-AQ)	PFAS by ID SOP	Perfluoro-1-nonanesulfonic acid (PFNS)	68259-12-1	ND	5000		ng/L	25
800-PYLiq-1	PFAS by Isotope Dilution (36 analytes) (Non-AQ)	PFAS by ID SOP	Perfluoro-1-octanesulfonamide (PFOSA)	754-91-6	ND	5000		ng/L	25
800-PYLiq-1	PFAS by Isotope Dilution (36 analytes) (Non-AQ)	PFAS by ID SOP	Perfluoro-1-pentanesulfonic acid (PFPeS)	2706-91-4	ND	5000		ng/L	25
800-PYLiq-1	PFAS by Isotope Dilution (36 analytes) (Non-AQ)	PFAS by ID SOP	Perfluorododecanesulfonic acid (PFDOS)	79780-39-5	ND	10000		ng/L	25
800-PYLiq-1	PFAS by Isotope Dilution (36 analytes) (Non-AQ)	PFAS by ID SOP	Perfluorohexanesulfonic acid (PFHxS)	355-46-4	ND	5000		ng/L	25
800-PYLiq-1	PFAS by Isotope Dilution (36 analytes) (Non-AQ)	PFAS by ID SOP	Perfluoro-n-butanoic acid (PFBA)	375-22-4	10000	5000		ng/L	25
800-PYLiq-1	PFAS by Isotope Dilution (36 analytes) (Non-AQ)	PFAS by ID SOP	Perfluoro-n-decanoic acid (PFDA)	335-76-2	ND	5000		ng/L	25
800-PYLiq-1	PFAS by Isotope Dilution (36 analytes) (Non-AQ)	PFAS by ID SOP	Perfluoro-n-dodecanoic acid (PFDoA)	307-55-1	ND	5000		ng/L	25
800-PYLiq-1	PFAS by Isotope Dilution (36 analytes) (Non-AQ)	PFAS by ID SOP	Perfluoro-n-heptanoic acid (PFHpA)	375-85-9	ND	5000		ng/L	25
800-PYLiq-1	PFAS by Isotope Dilution (36 analytes) (Non-AQ)	PFAS by ID SOP	Perfluoro-n-hexadecanoic acid (PFHxDA)	67905-19-5	ND	10000		ng/L	25
800-PYLiq-1	PFAS by Isotope Dilution (36 analytes) (Non-AQ)	PFAS by ID SOP	Perfluoro-n-hexanoic acid (PFHxA)	307-24-4	ND	5000		ng/L	25
800-PYLiq-1	PFAS by Isotope Dilution (36 analytes) (Non-AQ)	PFAS by ID SOP	Perfluoro-n-nonanoic acid (PFNA)	375-95-1	ND	5000		ng/L	25
800-PYLiq-1	PFAS by Isotope Dilution (36 analytes) (Non-AQ)	PFAS by ID SOP	Perfluoro-n-octadecanoic acid (PFODA)	16517-11-6	ND	10000		ng/L	25
800-PYLiq-1	PFAS by Isotope Dilution (36 analytes) (Non-AQ)	PFAS by ID SOP	Perfluoro-n-octanoic acid (PFOA)	335-67-1	ND	5000		ng/L	25
800-PYLiq-1	PFAS by Isotope Dilution (36 analytes) (Non-AQ)	PFAS by ID SOP	Perfluoro-n-pentanoic acid (PFPeA)	2706-90-3	ND	5000		ng/L	25
800-PYLiq-1	PFAS by Isotope Dilution (36 analytes) (Non-AQ)	PFAS by ID SOP	Perfluoro-n-tetradecanoic acid (PFTeDA)	376-06-7	ND	5000		ng/L	25
800-PYLiq-1	PFAS by Isotope Dilution (36 analytes) (Non-AQ)	PFAS by ID SOP	Perfluoro-n-tridecanoic acid (PFTrDA)	72629-94-8	ND	5000		ng/L	25
800-PYLiq-1	PFAS by Isotope Dilution (36 analytes) (Non-AQ)	PFAS by ID SOP	Perfluoro-n-undecanoic acid (PFUdA)	2058-94-8	ND	5000		ng/L	25
800-PYLiq-1	PFAS by Isotope Dilution (36 analytes) (Non-AQ)	PFAS by ID SOP	Perfluorooctanesulfonic acid (PFOS)	1763-23-1	ND	5000		ng/L	25
800-PYLiq-1	PFAS by Isotope Dilution (36 analytes) (Non-AQ)	PFAS by ID SOP	13C2_4:2FTS	SESI-0104	338	0.00-0.00		%	25
800-PYLiq-1	PFAS by Isotope Dilution (36 analytes) (Non-AQ)	PFAS by ID SOP	13C2_6:2FTS	SESI-0105	265	0.00-0.00		%	25
800-PYLiq-1	PFAS by Isotope Dilution (36 analytes) (Non-AQ)	PFAS by ID SOP	13C2_8:2FTS	SESI-0106	286	0.00-0.00		%	25
800-PYLiq-1	PFAS by Isotope Dilution (36 analytes) (Non-AQ)	PFAS by ID SOP	13C2_PFDoA	SESI-0118	131	0.00-0.00		%	25
800-PYLiq-1	PFAS by Isotope Dilution (36 analytes) (Non-AQ)	PFAS by ID SOP	13C2_PFHxDA	SESI-0103	178	0.00-0.00		%	25
800-PYLiq-1	PFAS by Isotope Dilution (36 analytes) (Non-AQ)	PFAS by ID SOP	13C2_PFTeDA	SESI-0119	157	0.00-0.00		%	25
800-PYLiq-1	PFAS by Isotope Dilution (36 analytes) (Non-AQ)	PFAS by ID SOP	13C3_PFBS	SESI-0116	89	0.00-0.00		%	25
800-PYLiq-1	PFAS by Isotope Dilution (36 analytes) (Non-AQ)	PFAS by ID SOP	13C3_PFHxS	SESI-0096	80	0.00-0.00		%	25
800-PYLiq-1	PFAS by Isotope Dilution (36 analytes) (Non-AQ)	PFAS by ID SOP	13C3-HFPO-DA	SESI-0121	59	0.00-0.00		%	25
800-PYLiq-1	PFAS by Isotope Dilution (36 analytes) (Non-AQ)	PFAS by ID SOP	13C4_PFBA	SESI-0111	47	0.00-0.00		%	25
800-PYLiq-1	PFAS by Isotope Dilution (36 analytes) (Non-AQ)	PFAS by ID SOP	13C4_PFHpA	SESI-0114	67	0.00-0.00		%	25
800-PYLiq-1	PFAS by Isotope Dilution (36 analytes) (Non-AQ)	PFAS by ID SOP	13C5_PFHxA	SESI-0113	67	0.00-0.00		%	25
800-PYLiq-1	PFAS by Isotope Dilution (36 analytes) (Non-AQ)	PFAS by ID SOP	13C5_PFPeA	SESI-0112	59	0.00-0.00		%	25
800-PYLiq-1	PFAS by Isotope Dilution (36 analytes) (Non-AQ)	PFAS by ID SOP	13C6_PFDA	SESI-0115	90	0.00-0.00		%	25
800-PYLiq-1	PFAS by Isotope Dilution (36 analytes) (Non-AQ)	PFAS by ID SOP	13C7_PFUdA	SESI-0117	119	0.00-0.00		%	25
800-PYLiq-1	PFAS by Isotope Dilution (36 analytes) (Non-AQ)	PFAS by ID SOP	13C8_PFOA	SESI-0097	70	0.00-0.00		%	25
800-PYLiq-1	PFAS by Isotope Dilution (36 analytes) (Non-AQ)	PFAS by ID SOP	13C8_PFOS	SESI-0098	83	0.00-0.00		%	25
800-PYLiq-1	PFAS by Isotope Dilution (36 analytes) (Non-AQ)	PFAS by ID SOP	13C8_PFOSA	SESI-0107	74	0.00-0.00		%	25
800-PYLiq-1	PFAS by Isotope Dilution (36 analytes) (Non-AQ)	PFAS by ID SOP	13C9_PFNA	SESI-0099	86	0.00-0.00		%	25
800-PYLiq-1	PFAS by Isotope Dilution (36 analytes) (Non-AQ)	PFAS by ID SOP	d-EtFOSA	SESI-0108	39	0.00-0.00		%	25
800-PYLiq-1	PFAS by Isotope Dilution (36 analytes) (Non-AQ)	PFAS by ID SOP	d5-EtFOSAA	SESI-0110	164	0.00-0.00		%	25
800-PYLiq-1	PFAS by Isotope Dilution (36 analytes) (Non-AQ)	PFAS by ID SOP	d9-EtFOSE	SESI-0130	24	0.00-0.00		%	25
800-PYLiq-1	PFAS by Isotope Dilution (36 analytes) (Non-AQ)	PFAS by ID SOP	d-MeFOSA	SESI-0109	49	0.00-0.00		%	25
800-PYLiq-1	PFAS by Isotope Dilution (36 analytes) (Non-AQ)	PFAS by ID SOP	d3-MeFOSAA	SESI-0102	144	0.00-0.00		%	25
800-PYLiq-1	PFAS by Isotope Dilution (36 analytes) (Non-AQ)	PFAS by ID SOP	d7-MeFOSE	SESI-0129	34	0.00-0.00		%	25
800-PYLiq-2	PFAS by Isotope Dilution (36 analytes) (Non-AQ)	PFAS by ID SOP	9-chlorohexadecafluoro-3-oxanone-1-sulfonic acid (9Cl-PF3ONS)	756426-58-1	ND	10000		ng/L	25
800-PYLiq-2	PFAS by Isotope Dilution (36 analytes) (Non-AQ)	PFAS by ID SOP	11-chloroeicosafluoro-3-oxaundecane-1-sulfonic acid (11Cl-PF3OUdS	763051-92-9	ND	10000		ng/L	25
800-PYLiq-2	PFAS by Isotope Dilution (36 analytes) (Non-AQ)	PFAS by ID SOP	1H, 1H, 2H, 2H-perfluorodecane sulfonic acid (8:2 FTS)	39108-34-4	ND	10000		ng/L	25
800-PYLiq-2	PFAS by Isotope Dilution (36 analytes) (Non-AQ)	PFAS by ID SOP	1H, 1H, 2H, 2H-perfluorooctane sulfonic acid (6:2 FTS)	27619-97-2	ND	10000		ng/L	25
800-PYLiq-2	PFAS by Isotope Dilution (36 analytes) (Non-AQ)	PFAS by ID SOP	1H,1H,2H,2H-perfluorododecane sulfonic acid (10:2 FTS)	120226-60-0	ND	10000		ng/L	25
800-PYLiq-2	PFAS by Isotope Dilution (36 analytes) (Non-AQ)	PFAS by ID SOP	1H,1H,2H,2H-perfluorohexane sulfonic acid (4:2 FTS)	757124-72-4	ND	10000		ng/L	25
800-PYLiq-2	PFAS by Isotope Dilution (36 analytes) (Non-AQ)	PFAS by ID SOP	Hexafluoropropylene oxide dimer acid (GenX)	13252-13-6	ND	10000		ng/L	25
800-PYLiq-2	PFAS by Isotope Dilution (36 analytes) (Non-AQ)	PFAS by ID SOP	4,8-dioxa-3H-perfluorononanoic acid (ADONA)	919005-14-4	ND	10000		ng/L	25
800-PYLiq-2	PFAS by Isotope Dilution (36 analytes) (Non-AQ)	PFAS by ID SOP	N-ethylperfluoro-1-octanesulfonamide (EtFOSA)	4151-50-2	ND	10000		ng/L	25
800-PYLiq-2	PFAS by Isotope Dilution (36 analytes) (Non-AQ)	PFAS by ID SOP	N-ethylperfluoro-1-octanesulfonamidoacetic acid (EtFOSAA)	2991-50-6	ND	10000		ng/L	25
800-PYLiq-2	PFAS by Isotope Dilution (36 analytes) (Non-AQ)	PFAS by ID SOP	2-N-ethylperfluoro-1-octanesulfonamido-ethanol (EtFOSE)	1691-99-2	42000	10000		ng/L	25
800-PYLiq-2	PFAS by Isotope Dilution (36 analytes) (Non-AQ)	PFAS by ID SOP	N-methylperfluoro-1-octanesulfonamide (MeFOSA)	31506-32-8	ND	20000		ng/L	25
800-PYLiq-2	PFAS by Isotope Dilution (36 analytes) (Non-AQ)	PFAS by ID SOP	N-methylperfluoro-1-octanesulfonamidoacetic acid (MeFOSAA)	2355-31-9	ND	10000		ng/L	25
800-PYLiq-2	PFAS by Isotope Dilution (36 analytes) (Non-AQ)	PFAS by ID SOP	2-N-methylperfluoro-1-octanesulfonamido-ethanol (MeFOSE)	24448-09-7	71000	10000		ng/L	25
800-PYLiq-2	PFAS by Isotope Dilution (36 analytes) (Non-AQ)	PFAS by ID SOP	Perfluoro-1-butanesulfonic acid (PFBS)	375-73-5	ND	5000		ng/L	25
800-PYLiq-2	PFAS by Isotope Dilution (36 analytes) (Non-AQ)	PFAS by ID SOP	Perfluoro-1-decanesulfonic acid (PFDS)	335-77-3	ND	5000		ng/L	25
800-PYLiq-2	PFAS by Isotope Dilution (36 analytes) (Non-AQ)	PFAS by ID SOP	Perfluoro-1-heptanesulfonic acid (PFHpS)	375-92-8	ND	5000		ng/L	25
800-PYLiq-2	PFAS by Isotope Dilution (36 analytes) (Non-AQ)	PFAS by ID SOP	Perfluoro-1-nonanesulfonic acid (PFNS)	68259-12-1	ND	5000		ng/L	25
800-PYLiq-2	PFAS by Isotope Dilution (36 analytes) (Non-AQ)	PFAS by ID SOP	Perfluoro-1-octanesulfonamide (PFOSA)	754-91-6	ND	5000		ng/L	25
800-PYLiq-2	PFAS by Isotope Dilution (36 analytes) (Non-AQ)	PFAS by ID SOP	Perfluoro-1-pentanesulfonic acid (PFPeS)	2706-91-4	ND	5000		ng/L	25
800-PYLiq-2	PFAS by Isotope Dilution (36 analytes) (Non-AQ)	PFAS by ID SOP	Perfluorododecanesulfonic acid (PFDOS)	79780-39-5	ND	10000		ng/L	25
800-PYLiq-2	PFAS by Isotope Dilution (36 analytes) (Non-AQ)	PFAS by ID SOP	Perfluorohexanesulfonic acid (PFHxS)	355-46-4	ND	5000		ng/L	25
800-PYLiq-2	PFAS by Isotope Dilution (36 analytes) (Non-AQ)	PFAS by ID SOP	Perfluoro-n-butanoic acid (PFBA)	375-22-4	14000	5000		ng/L	25
800-PYLiq-2	PFAS by Isotope Dilution (36 analytes) (Non-AQ)	PFAS by ID SOP	Perfluoro-n-decanoic acid (PFDA)	335-76-2	ND	5000		ng/L	25
800-PYLiq-2	PFAS by Isotope Dilution (36 analytes) (Non-AQ)	PFAS by ID SOP	Perfluoro-n-dodecanoic acid (PFDoA)	307-55-1	ND	5000		ng/L	25
800-PYLiq-2	PFAS by Isotope Dilution (36 analytes) (Non-AQ)	PFAS by ID SOP	Perfluoro-n-heptanoic acid (PFHpA)	375-85-9	ND	5000		ng/L	25
800-PYLiq-2	PFAS by Isotope Dilution (36 analytes) (Non-AQ)	PFAS by ID SOP	Perfluoro-n-hexadecanoic acid (PFHxDA)	67905-19-5	ND	10000		ng/L	25
800-PYLiq-2	PFAS by Isotope Dilution (36 analytes) (Non-AQ)	PFAS by ID SOP	Perfluoro-n-hexanoic acid (PFHxA)	307-24-4	ND	5000		ng/L	25
800-PYLiq-2	PFAS by Isotope Dilution (36 analytes) (Non-AQ)	PFAS by ID SOP	Perfluoro-n-nonanoic acid (PFNA)	375-95-1	ND	5000		ng/L	25
800-PYLiq-2	PFAS by Isotope Dilution (36 analytes) (Non-AQ)	PFAS by ID SOP	Perfluoro-n-octadecanoic acid (PFODA)	16517-11-6	ND	10000		ng/L	25
800-PYLiq-2	PFAS by Isotope Dilution (36 analytes) (Non-AQ)	PFAS by ID SOP	Perfluoro-n-octanoic acid (PFOA)	335-67-1	ND	5000		ng/L	25
800-PYLiq-2	PFAS by Isotope Dilution (36 analytes) (Non-AQ)	PFAS by ID SOP	Perfluoro-n-pentanoic acid (PFPeA)	2706-90-3	ND	5000		ng/L	25
800-PYLiq-2	PFAS by Isotope Dilution (36 analytes) (Non-AQ)	PFAS by ID SOP	Perfluoro-n-tetradecanoic acid (PFTeDA)	376-06-7	ND	5000		ng/L	25
800-PYLiq-2	PFAS by Isotope Dilution (36 analytes) (Non-AQ)	PFAS by ID SOP	Perfluoro-n-tridecanoic acid (PFTrDA)	72629-94-8	ND	5000		ng/L	25
800-PYLiq-2	PFAS by Isotope Dilution (36 analytes) (Non-AQ)	PFAS by ID SOP	Perfluoro-n-undecanoic acid (PFUdA)	2058-94-8	ND	5000		ng/L	25
800-PYLiq-2	PFAS by Isotope Dilution (36 analytes) (Non-AQ)	PFAS by ID SOP	Perfluorooctanesulfonic acid (PFOS)	1763-23-1	ND	5000		ng/L	25
800-PYLiq-2	PFAS by Isotope Dilution (36 analytes) (Non-AQ)	PFAS by ID SOP	13C2_4:2FTS	SESI-0104	342	0.00-0.00		%	25
800-PYLiq-2	PFAS by Isotope Dilution (36 analytes) (Non-AQ)	PFAS by ID SOP	13C2_6:2FTS	SESI-0105	252	0.00-0.00		%	25
800-PYLiq-2	PFAS by Isotope Dilution (36 analytes) (Non-AQ)	PFAS by ID SOP	13C2_8:2FTS	SESI-0106	284	0.00-0.00		%	25
800-PYLiq-2	PFAS by Isotope Dilution (36 analytes) (Non-AQ)	PFAS by ID SOP	13C2_PFDoA	SESI-0118	138	0.00-0.00		%	25
800-PYLiq-2	PFAS by Isotope Dilution (36 analytes) (Non-AQ)	PFAS by ID SOP	13C2_PFHxDA	SESI-0103	180	0.00-0.00		%	25
800-PYLiq-2	PFAS by Isotope Dilution (36 analytes) (Non-AQ)	PFAS by ID SOP	13C2_PFTeDA	SESI-0119	153	0.00-0.00		%	25
800-PYLiq-2	PFAS by Isotope Dilution (36 analytes) (Non-AQ)	PFAS by ID SOP	13C3_PFBS	SESI-0116	89	0.00-0.00		%	25
800-PYLiq-2	PFAS by Isotope Dilution (36 analytes) (Non-AQ)	PFAS by ID SOP	13C3_PFHxS	SESI-0096	81	0.00-0.00		%	25
800-PYLiq-2	PFAS by Isotope Dilution (36 analytes) (Non-AQ)	PFAS by ID SOP	13C3-HFPO-DA	SESI-0121	62	0.00-0.00		%	25
800-PYLiq-2	PFAS by Isotope Dilution (36 analytes) (Non-AQ)	PFAS by ID SOP	13C4_PFBA	SESI-0111	48	0.00-0.00		%	25
800-PYLiq-2	PFAS by Isotope Dilution (36 analytes) (Non-AQ)	PFAS by ID SOP	13C4_PFHpA	SESI-0114	68	0.00-0.00		%	25
800-PYLiq-2	PFAS by Isotope Dilution (36 analytes) (Non-AQ)	PFAS by ID SOP	13C5_PFHxA	SESI-0113	69	0.00-0.00		%	25
800-PYLiq-2	PFAS by Isotope Dilution (36 analytes) (Non-AQ)	PFAS by ID SOP	13C5_PFPeA	SESI-0112	60	0.00-0.00		%	25
800-PYLiq-2	PFAS by Isotope Dilution (36 analytes) (Non-AQ)	PFAS by ID SOP	13C6_PFDA	SESI-0115	92	0.00-0.00		%	25
800-PYLiq-2	PFAS by Isotope Dilution (36 analytes) (Non-AQ)	PFAS by ID SOP	13C7_PFUdA	SESI-0117	114	0.00-0.00		%	25
800-PYLiq-2	PFAS by Isotope Dilution (36 analytes) (Non-AQ)	PFAS by ID SOP	13C8_PFOA	SESI-0097	74	0.00-0.00		%	25
800-PYLiq-2	PFAS by Isotope Dilution (36 analytes) (Non-AQ)	PFAS by ID SOP	13C8_PFOS	SESI-0098	87	0.00-0.00		%	25
800-PYLiq-2	PFAS by Isotope Dilution (36 analytes) (Non-AQ)	PFAS by ID SOP	13C8_PFOSA	SESI-0107	73	0.00-0.00		%	25
800-PYLiq-2	PFAS by Isotope Dilution (36 analytes) (Non-AQ)	PFAS by ID SOP	13C9_PFNA	SESI-0099	89	0.00-0.00		%	25
800-PYLiq-2	PFAS by Isotope Dilution (36 analytes) (Non-AQ)	PFAS by ID SOP	d-EtFOSA	SESI-0108	36	0.00-0.00		%	25
800-PYLiq-2	PFAS by Isotope Dilution (36 analytes) (Non-AQ)	PFAS by ID SOP	d5-EtFOSAA	SESI-0110	174	0.00-0.00		%	25
800-PYLiq-2	PFAS by Isotope Dilution (36 analytes) (Non-AQ)	PFAS by ID SOP	d9-EtFOSE	SESI-0130	24	0.00-0.00		%	25
800-PYLiq-2	PFAS by Isotope Dilution (36 analytes) (Non-AQ)	PFAS by ID SOP	d-MeFOSA	SESI-0109	55	0.00-0.00		%	25
800-PYLiq-2	PFAS by Isotope Dilution (36 analytes) (Non-AQ)	PFAS by ID SOP	d3-MeFOSAA	SESI-0102	149	0.00-0.00		%	25
800-PYLiq-2	PFAS by Isotope Dilution (36 analytes) (Non-AQ)	PFAS by ID SOP	d7-MeFOSE	SESI-0129	37	0.00-0.00		%	25
800-PYLiq-3	PFAS by Isotope Dilution (36 analytes) (Non-AQ)	PFAS by ID SOP	9-chlorohexadecafluoro-3-oxanone-1-sulfonic acid (9Cl-PF3ONS)	756426-58-1	ND	10000		ng/L	25
800-PYLiq-3	PFAS by Isotope Dilution (36 analytes) (Non-AQ)	PFAS by ID SOP	11-chloroeicosafluoro-3-oxaundecane-1-sulfonic acid (11Cl-PF3OUdS	763051-92-9	ND	10000		ng/L	25
800-PYLiq-3	PFAS by Isotope Dilution (36 analytes) (Non-AQ)	PFAS by ID SOP	1H, 1H, 2H, 2H-perfluorodecane sulfonic acid (8:2 FTS)	39108-34-4	ND	10000		ng/L	25
800-PYLiq-3	PFAS by Isotope Dilution (36 analytes) (Non-AQ)	PFAS by ID SOP	1H, 1H, 2H, 2H-perfluorooctane sulfonic acid (6:2 FTS)	27619-97-2	ND	10000		ng/L	25
800-PYLiq-3	PFAS by Isotope Dilution (36 analytes) (Non-AQ)	PFAS by ID SOP	1H,1H,2H,2H-perfluorododecane sulfonic acid (10:2 FTS)	120226-60-0	ND	10000		ng/L	25
800-PYLiq-3	PFAS by Isotope Dilution (36 analytes) (Non-AQ)	PFAS by ID SOP	1H,1H,2H,2H-perfluorohexane sulfonic acid (4:2 FTS)	757124-72-4	ND	10000		ng/L	25
800-PYLiq-3	PFAS by Isotope Dilution (36 analytes) (Non-AQ)	PFAS by ID SOP	Hexafluoropropylene oxide dimer acid (GenX)	13252-13-6	ND	10000		ng/L	25
800-PYLiq-3	PFAS by Isotope Dilution (36 analytes) (Non-AQ)	PFAS by ID SOP	4,8-dioxa-3H-perfluorononanoic acid (ADONA)	919005-14-4	ND	10000		ng/L	25
800-PYLiq-3	PFAS by Isotope Dilution (36 analytes) (Non-AQ)	PFAS by ID SOP	N-ethylperfluoro-1-octanesulfonamide (EtFOSA)	4151-50-2	ND	10000		ng/L	25
800-PYLiq-3	PFAS by Isotope Dilution (36 analytes) (Non-AQ)	PFAS by ID SOP	N-ethylperfluoro-1-octanesulfonamidoacetic acid (EtFOSAA)	2991-50-6	ND	10000		ng/L	25
800-PYLiq-3	PFAS by Isotope Dilution (36 analytes) (Non-AQ)	PFAS by ID SOP	2-N-ethylperfluoro-1-octanesulfonamido-ethanol (EtFOSE)	1691-99-2	80000	10000		ng/L	25
800-PYLiq-3	PFAS by Isotope Dilution (36 analytes) (Non-AQ)	PFAS by ID SOP	N-methylperfluoro-1-octanesulfonamide (MeFOSA)	31506-32-8	ND	20000		ng/L	25
800-PYLiq-3	PFAS by Isotope Dilution (36 analytes) (Non-AQ)	PFAS by ID SOP	N-methylperfluoro-1-octanesulfonamidoacetic acid (MeFOSAA)	2355-31-9	ND	10000		ng/L	25
800-PYLiq-3	PFAS by Isotope Dilution (36 analytes) (Non-AQ)	PFAS by ID SOP	2-N-methylperfluoro-1-octanesulfonamido-ethanol (MeFOSE)	24448-09-7	140000	10000		ng/L	25
800-PYLiq-3	PFAS by Isotope Dilution (36 analytes) (Non-AQ)	PFAS by ID SOP	Perfluoro-1-butanesulfonic acid (PFBS)	375-73-5	ND	5000		ng/L	25
800-PYLiq-3	PFAS by Isotope Dilution (36 analytes) (Non-AQ)	PFAS by ID SOP	Perfluoro-1-decanesulfonic acid (PFDS)	335-77-3	ND	5000		ng/L	25
800-PYLiq-3	PFAS by Isotope Dilution (36 analytes) (Non-AQ)	PFAS by ID SOP	Perfluoro-1-heptanesulfonic acid (PFHpS)	375-92-8	ND	5000		ng/L	25
800-PYLiq-3	PFAS by Isotope Dilution (36 analytes) (Non-AQ)	PFAS by ID SOP	Perfluoro-1-nonanesulfonic acid (PFNS)	68259-12-1	ND	5000		ng/L	25
800-PYLiq-3	PFAS by Isotope Dilution (36 analytes) (Non-AQ)	PFAS by ID SOP	Perfluoro-1-octanesulfonamide (PFOSA)	754-91-6	5100	5000		ng/L	25
800-PYLiq-3	PFAS by Isotope Dilution (36 analytes) (Non-AQ)	PFAS by ID SOP	Perfluoro-1-pentanesulfonic acid (PFPeS)	2706-91-4	ND	5000		ng/L	25
800-PYLiq-3	PFAS by Isotope Dilution (36 analytes) (Non-AQ)	PFAS by ID SOP	Perfluorododecanesulfonic acid (PFDOS)	79780-39-5	ND	10000		ng/L	25
800-PYLiq-3	PFAS by Isotope Dilution (36 analytes) (Non-AQ)	PFAS by ID SOP	Perfluorohexanesulfonic acid (PFHxS)	355-46-4	ND	5000		ng/L	25
800-PYLiq-3	PFAS by Isotope Dilution (36 analytes) (Non-AQ)	PFAS by ID SOP	Perfluoro-n-butanoic acid (PFBA)	375-22-4	6600	5000		ng/L	25
800-PYLiq-3	PFAS by Isotope Dilution (36 analytes) (Non-AQ)	PFAS by ID SOP	Perfluoro-n-decanoic acid (PFDA)	335-76-2	ND	5000		ng/L	25
800-PYLiq-3	PFAS by Isotope Dilution (36 analytes) (Non-AQ)	PFAS by ID SOP	Perfluoro-n-dodecanoic acid (PFDoA)	307-55-1	ND	5000		ng/L	25
800-PYLiq-3	PFAS by Isotope Dilution (36 analytes) (Non-AQ)	PFAS by ID SOP	Perfluoro-n-heptanoic acid (PFHpA)	375-85-9	ND	5000		ng/L	25
800-PYLiq-3	PFAS by Isotope Dilution (36 analytes) (Non-AQ)	PFAS by ID SOP	Perfluoro-n-hexadecanoic acid (PFHxDA)	67905-19-5	ND	10000		ng/L	25
800-PYLiq-3	PFAS by Isotope Dilution (36 analytes) (Non-AQ)	PFAS by ID SOP	Perfluoro-n-hexanoic acid (PFHxA)	307-24-4	ND	5000		ng/L	25
800-PYLiq-3	PFAS by Isotope Dilution (36 analytes) (Non-AQ)	PFAS by ID SOP	Perfluoro-n-nonanoic acid (PFNA)	375-95-1	ND	5000		ng/L	25
800-PYLiq-3	PFAS by Isotope Dilution (36 analytes) (Non-AQ)	PFAS by ID SOP	Perfluoro-n-octadecanoic acid (PFODA)	16517-11-6	ND	10000		ng/L	25
800-PYLiq-3	PFAS by Isotope Dilution (36 analytes) (Non-AQ)	PFAS by ID SOP	Perfluoro-n-octanoic acid (PFOA)	335-67-1	ND	5000		ng/L	25
800-PYLiq-3	PFAS by Isotope Dilution (36 analytes) (Non-AQ)	PFAS by ID SOP	Perfluoro-n-pentanoic acid (PFPeA)	2706-90-3	ND	5000		ng/L	25
800-PYLiq-3	PFAS by Isotope Dilution (36 analytes) (Non-AQ)	PFAS by ID SOP	Perfluoro-n-tetradecanoic acid (PFTeDA)	376-06-7	ND	5000		ng/L	25
800-PYLiq-3	PFAS by Isotope Dilution (36 analytes) (Non-AQ)	PFAS by ID SOP	Perfluoro-n-tridecanoic acid (PFTrDA)	72629-94-8	ND	5000		ng/L	25
800-PYLiq-3	PFAS by Isotope Dilution (36 analytes) (Non-AQ)	PFAS by ID SOP	Perfluoro-n-undecanoic acid (PFUdA)	2058-94-8	ND	5000		ng/L	25
800-PYLiq-3	PFAS by Isotope Dilution (36 analytes) (Non-AQ)	PFAS by ID SOP	Perfluorooctanesulfonic acid (PFOS)	1763-23-1	ND	5000		ng/L	25
800-PYLiq-3	PFAS by Isotope Dilution (36 analytes) (Non-AQ)	PFAS by ID SOP	13C2_4:2FTS	SESI-0104	314	0.00-0.00		%	25
800-PYLiq-3	PFAS by Isotope Dilution (36 analytes) (Non-AQ)	PFAS by ID SOP	13C2_6:2FTS	SESI-0105	235	0.00-0.00		%	25
800-PYLiq-3	PFAS by Isotope Dilution (36 analytes) (Non-AQ)	PFAS by ID SOP	13C2_8:2FTS	SESI-0106	270	0.00-0.00		%	25
800-PYLiq-3	PFAS by Isotope Dilution (36 analytes) (Non-AQ)	PFAS by ID SOP	13C2_PFDoA	SESI-0118	128	0.00-0.00		%	25
800-PYLiq-3	PFAS by Isotope Dilution (36 analytes) (Non-AQ)	PFAS by ID SOP	13C2_PFHxDA	SESI-0103	170	0.00-0.00		%	25
800-PYLiq-3	PFAS by Isotope Dilution (36 analytes) (Non-AQ)	PFAS by ID SOP	13C2_PFTeDA	SESI-0119	142	0.00-0.00		%	25
800-PYLiq-3	PFAS by Isotope Dilution (36 analytes) (Non-AQ)	PFAS by ID SOP	13C3_PFBS	SESI-0116	80	0.00-0.00		%	25
800-PYLiq-3	PFAS by Isotope Dilution (36 analytes) (Non-AQ)	PFAS by ID SOP	13C3_PFHxS	SESI-0096	74	0.00-0.00		%	25
800-PYLiq-3	PFAS by Isotope Dilution (36 analytes) (Non-AQ)	PFAS by ID SOP	13C3-HFPO-DA	SESI-0121	56	0.00-0.00		%	25
800-PYLiq-3	PFAS by Isotope Dilution (36 analytes) (Non-AQ)	PFAS by ID SOP	13C4_PFBA	SESI-0111	47	0.00-0.00		%	25
800-PYLiq-3	PFAS by Isotope Dilution (36 analytes) (Non-AQ)	PFAS by ID SOP	13C4_PFHpA	SESI-0114	62	0.00-0.00		%	25
800-PYLiq-3	PFAS by Isotope Dilution (36 analytes) (Non-AQ)	PFAS by ID SOP	13C5_PFHxA	SESI-0113	62	0.00-0.00		%	25
800-PYLiq-3	PFAS by Isotope Dilution (36 analytes) (Non-AQ)	PFAS by ID SOP	13C5_PFPeA	SESI-0112	55	0.00-0.00		%	25
800-PYLiq-3	PFAS by Isotope Dilution (36 analytes) (Non-AQ)	PFAS by ID SOP	13C6_PFDA	SESI-0115	85	0.00-0.00		%	25
800-PYLiq-3	PFAS by Isotope Dilution (36 analytes) (Non-AQ)	PFAS by ID SOP	13C7_PFUdA	SESI-0117	105	0.00-0.00		%	25
800-PYLiq-3	PFAS by Isotope Dilution (36 analytes) (Non-AQ)	PFAS by ID SOP	13C8_PFOA	SESI-0097	66	0.00-0.00		%	25
800-PYLiq-3	PFAS by Isotope Dilution (36 analytes) (Non-AQ)	PFAS by ID SOP	13C8_PFOS	SESI-0098	83	0.00-0.00		%	25
800-PYLiq-3	PFAS by Isotope Dilution (36 analytes) (Non-AQ)	PFAS by ID SOP	13C8_PFOSA	SESI-0107	68	0.00-0.00		%	25
800-PYLiq-3	PFAS by Isotope Dilution (36 analytes) (Non-AQ)	PFAS by ID SOP	13C9_PFNA	SESI-0099	81	0.00-0.00		%	25
800-PYLiq-3	PFAS by Isotope Dilution (36 analytes) (Non-AQ)	PFAS by ID SOP	d-EtFOSA	SESI-0108	32	0.00-0.00		%	25
800-PYLiq-3	PFAS by Isotope Dilution (36 analytes) (Non-AQ)	PFAS by ID SOP	d5-EtFOSAA	SESI-0110	159	0.00-0.00		%	25
800-PYLiq-3	PFAS by Isotope Dilution (36 analytes) (Non-AQ)	PFAS by ID SOP	d9-EtFOSE	SESI-0130	21	0.00-0.00		%	25
800-PYLiq-3	PFAS by Isotope Dilution (36 analytes) (Non-AQ)	PFAS by ID SOP	d-MeFOSA	SESI-0109	44	0.00-0.00		%	25
800-PYLiq-3	PFAS by Isotope Dilution (36 analytes) (Non-AQ)	PFAS by ID SOP	d3-MeFOSAA	SESI-0102	146	0.00-0.00		%	25
800-PYLiq-3	PFAS by Isotope Dilution (36 analytes) (Non-AQ)	PFAS by ID SOP	d7-MeFOSE	SESI-0129	37	0.00-0.00		%	25
650-PYLiq-1	PFAS by Isotope Dilution (36 analytes) (Non-AQ)	PFAS by ID SOP	9-chlorohexadecafluoro-3-oxanone-1-sulfonic acid (9Cl-PF3ONS)	756426-58-1	ND	10000		ng/L	25
650-PYLiq-1	PFAS by Isotope Dilution (36 analytes) (Non-AQ)	PFAS by ID SOP	11-chloroeicosafluoro-3-oxaundecane-1-sulfonic acid (11Cl-PF3OUdS	763051-92-9	ND	10000		ng/L	25
650-PYLiq-1	PFAS by Isotope Dilution (36 analytes) (Non-AQ)	PFAS by ID SOP	1H, 1H, 2H, 2H-perfluorodecane sulfonic acid (8:2 FTS)	39108-34-4	ND	10000		ng/L	25
650-PYLiq-1	PFAS by Isotope Dilution (36 analytes) (Non-AQ)	PFAS by ID SOP	1H, 1H, 2H, 2H-perfluorooctane sulfonic acid (6:2 FTS)	27619-97-2	ND	10000		ng/L	25
650-PYLiq-1	PFAS by Isotope Dilution (36 analytes) (Non-AQ)	PFAS by ID SOP	1H,1H,2H,2H-perfluorododecane sulfonic acid (10:2 FTS)	120226-60-0	ND	10000		ng/L	25
650-PYLiq-1	PFAS by Isotope Dilution (36 analytes) (Non-AQ)	PFAS by ID SOP	1H,1H,2H,2H-perfluorohexane sulfonic acid (4:2 FTS)	757124-72-4	ND	10000		ng/L	25
650-PYLiq-1	PFAS by Isotope Dilution (36 analytes) (Non-AQ)	PFAS by ID SOP	Hexafluoropropylene oxide dimer acid (GenX)	13252-13-6	ND	10000		ng/L	25
650-PYLiq-1	PFAS by Isotope Dilution (36 analytes) (Non-AQ)	PFAS by ID SOP	4,8-dioxa-3H-perfluorononanoic acid (ADONA)	919005-14-4	ND	10000		ng/L	25
650-PYLiq-1	PFAS by Isotope Dilution (36 analytes) (Non-AQ)	PFAS by ID SOP	N-ethylperfluoro-1-octanesulfonamide (EtFOSA)	4151-50-2	ND	10000		ng/L	25
650-PYLiq-1	PFAS by Isotope Dilution (36 analytes) (Non-AQ)	PFAS by ID SOP	N-ethylperfluoro-1-octanesulfonamidoacetic acid (EtFOSAA)	2991-50-6	ND	10000		ng/L	25
650-PYLiq-1	PFAS by Isotope Dilution (36 analytes) (Non-AQ)	PFAS by ID SOP	2-N-ethylperfluoro-1-octanesulfonamido-ethanol (EtFOSE)	1691-99-2	94000	10000		ng/L	25
650-PYLiq-1	PFAS by Isotope Dilution (36 analytes) (Non-AQ)	PFAS by ID SOP	N-methylperfluoro-1-octanesulfonamide (MeFOSA)	31506-32-8	ND	20000		ng/L	25
650-PYLiq-1	PFAS by Isotope Dilution (36 analytes) (Non-AQ)	PFAS by ID SOP	N-methylperfluoro-1-octanesulfonamidoacetic acid (MeFOSAA)	2355-31-9	ND	10000		ng/L	25
650-PYLiq-1	PFAS by Isotope Dilution (36 analytes) (Non-AQ)	PFAS by ID SOP	2-N-methylperfluoro-1-octanesulfonamido-ethanol (MeFOSE)	24448-09-7	170000	10000		ng/L	25
650-PYLiq-1	PFAS by Isotope Dilution (36 analytes) (Non-AQ)	PFAS by ID SOP	Perfluoro-1-butanesulfonic acid (PFBS)	375-73-5	ND	5000		ng/L	25
650-PYLiq-1	PFAS by Isotope Dilution (36 analytes) (Non-AQ)	PFAS by ID SOP	Perfluoro-1-decanesulfonic acid (PFDS)	335-77-3	ND	5000		ng/L	25
650-PYLiq-1	PFAS by Isotope Dilution (36 analytes) (Non-AQ)	PFAS by ID SOP	Perfluoro-1-heptanesulfonic acid (PFHpS)	375-92-8	ND	5000		ng/L	25
650-PYLiq-1	PFAS by Isotope Dilution (36 analytes) (Non-AQ)	PFAS by ID SOP	Perfluoro-1-nonanesulfonic acid (PFNS)	68259-12-1	ND	5000		ng/L	25
650-PYLiq-1	PFAS by Isotope Dilution (36 analytes) (Non-AQ)	PFAS by ID SOP	Perfluoro-1-octanesulfonamide (PFOSA)	754-91-6	6500	5000		ng/L	25
650-PYLiq-1	PFAS by Isotope Dilution (36 analytes) (Non-AQ)	PFAS by ID SOP	Perfluoro-1-pentanesulfonic acid (PFPeS)	2706-91-4	ND	5000		ng/L	25
650-PYLiq-1	PFAS by Isotope Dilution (36 analytes) (Non-AQ)	PFAS by ID SOP	Perfluorododecanesulfonic acid (PFDOS)	79780-39-5	ND	10000		ng/L	25
650-PYLiq-1	PFAS by Isotope Dilution (36 analytes) (Non-AQ)	PFAS by ID SOP	Perfluorohexanesulfonic acid (PFHxS)	355-46-4	ND	5000		ng/L	25
650-PYLiq-1	PFAS by Isotope Dilution (36 analytes) (Non-AQ)	PFAS by ID SOP	Perfluoro-n-butanoic acid (PFBA)	375-22-4	7000	5000		ng/L	25
650-PYLiq-1	PFAS by Isotope Dilution (36 analytes) (Non-AQ)	PFAS by ID SOP	Perfluoro-n-decanoic acid (PFDA)	335-76-2	ND	5000		ng/L	25
650-PYLiq-1	PFAS by Isotope Dilution (36 analytes) (Non-AQ)	PFAS by ID SOP	Perfluoro-n-dodecanoic acid (PFDoA)	307-55-1	ND	5000		ng/L	25
650-PYLiq-1	PFAS by Isotope Dilution (36 analytes) (Non-AQ)	PFAS by ID SOP	Perfluoro-n-heptanoic acid (PFHpA)	375-85-9	ND	5000		ng/L	25
650-PYLiq-1	PFAS by Isotope Dilution (36 analytes) (Non-AQ)	PFAS by ID SOP	Perfluoro-n-hexadecanoic acid (PFHxDA)	67905-19-5	ND	10000		ng/L	25
650-PYLiq-1	PFAS by Isotope Dilution (36 analytes) (Non-AQ)	PFAS by ID SOP	Perfluoro-n-hexanoic acid (PFHxA)	307-24-4	ND	5000		ng/L	25
650-PYLiq-1	PFAS by Isotope Dilution (36 analytes) (Non-AQ)	PFAS by ID SOP	Perfluoro-n-nonanoic acid (PFNA)	375-95-1	ND	5000		ng/L	25
650-PYLiq-1	PFAS by Isotope Dilution (36 analytes) (Non-AQ)	PFAS by ID SOP	Perfluoro-n-octadecanoic acid (PFODA)	16517-11-6	ND	10000		ng/L	25
650-PYLiq-1	PFAS by Isotope Dilution (36 analytes) (Non-AQ)	PFAS by ID SOP	Perfluoro-n-octanoic acid (PFOA)	335-67-1	ND	5000		ng/L	25
650-PYLiq-1	PFAS by Isotope Dilution (36 analytes) (Non-AQ)	PFAS by ID SOP	Perfluoro-n-pentanoic acid (PFPeA)	2706-90-3	ND	5000		ng/L	25
650-PYLiq-1	PFAS by Isotope Dilution (36 analytes) (Non-AQ)	PFAS by ID SOP	Perfluoro-n-tetradecanoic acid (PFTeDA)	376-06-7	ND	5000		ng/L	25
650-PYLiq-1	PFAS by Isotope Dilution (36 analytes) (Non-AQ)	PFAS by ID SOP	Perfluoro-n-tridecanoic acid (PFTrDA)	72629-94-8	ND	5000		ng/L	25
650-PYLiq-1	PFAS by Isotope Dilution (36 analytes) (Non-AQ)	PFAS by ID SOP	Perfluoro-n-undecanoic acid (PFUdA)	2058-94-8	ND	5000		ng/L	25
650-PYLiq-1	PFAS by Isotope Dilution (36 analytes) (Non-AQ)	PFAS by ID SOP	Perfluorooctanesulfonic acid (PFOS)	1763-23-1	ND	5000		ng/L	25
650-PYLiq-1	PFAS by Isotope Dilution (36 analytes) (Non-AQ)	PFAS by ID SOP	13C2_4:2FTS	SESI-0104	354	6.0134700169990		%	25
650-PYLiq-1	PFAS by Isotope Dilution (36 analytes) (Non-AQ)	PFAS by ID SOP	13C2_6:2FTS	SESI-0105	276	6.0134700169990		%	25
650-PYLiq-1	PFAS by Isotope Dilution (36 analytes) (Non-AQ)	PFAS by ID SOP	13C2_8:2FTS	SESI-0106	306	6.0134700169990		%	25
650-PYLiq-1	PFAS by Isotope Dilution (36 analytes) (Non-AQ)	PFAS by ID SOP	13C2_PFDoA	SESI-0118	135	6.0134700169990		%	25
650-PYLiq-1	PFAS by Isotope Dilution (36 analytes) (Non-AQ)	PFAS by ID SOP	13C2_PFHxDA	SESI-0103	190	6.0134700169990		%	25
650-PYLiq-1	PFAS by Isotope Dilution (36 analytes) (Non-AQ)	PFAS by ID SOP	13C2_PFTeDA	SESI-0119	158	6.0134700169990		%	25
650-PYLiq-1	PFAS by Isotope Dilution (36 analytes) (Non-AQ)	PFAS by ID SOP	13C3_PFBS	SESI-0116	95	6.0134700169990		%	25
650-PYLiq-1	PFAS by Isotope Dilution (36 analytes) (Non-AQ)	PFAS by ID SOP	13C3_PFHxS	SESI-0096	84	6.0134700169990		%	25
650-PYLiq-1	PFAS by Isotope Dilution (36 analytes) (Non-AQ)	PFAS by ID SOP	13C3-HFPO-DA	SESI-0121	62	6.0134700169990		%	25
650-PYLiq-1	PFAS by Isotope Dilution (36 analytes) (Non-AQ)	PFAS by ID SOP	13C4_PFBA	SESI-0111	52	6.0134700169990		%	25
650-PYLiq-1	PFAS by Isotope Dilution (36 analytes) (Non-AQ)	PFAS by ID SOP	13C4_PFHpA	SESI-0114	68	6.0134700169990		%	25
650-PYLiq-1	PFAS by Isotope Dilution (36 analytes) (Non-AQ)	PFAS by ID SOP	13C5_PFHxA	SESI-0113	71	6.0134700169990		%	25
650-PYLiq-1	PFAS by Isotope Dilution (36 analytes) (Non-AQ)	PFAS by ID SOP	13C5_PFPeA	SESI-0112	62	6.0134700169990		%	25
650-PYLiq-1	PFAS by Isotope Dilution (36 analytes) (Non-AQ)	PFAS by ID SOP	13C6_PFDA	SESI-0115	92	6.0134700169990		%	25
650-PYLiq-1	PFAS by Isotope Dilution (36 analytes) (Non-AQ)	PFAS by ID SOP	13C7_PFUdA	SESI-0117	113	6.0134700169990		%	25
650-PYLiq-1	PFAS by Isotope Dilution (36 analytes) (Non-AQ)	PFAS by ID SOP	13C8_PFOA	SESI-0097	75	6.0134700169990		%	25
650-PYLiq-1	PFAS by Isotope Dilution (36 analytes) (Non-AQ)	PFAS by ID SOP	13C8_PFOS	SESI-0098	89	6.0134700169990		%	25
650-PYLiq-1	PFAS by Isotope Dilution (36 analytes) (Non-AQ)	PFAS by ID SOP	13C8_PFOSA	SESI-0107	74	6.0134700169990		%	25
650-PYLiq-1	PFAS by Isotope Dilution (36 analytes) (Non-AQ)	PFAS by ID SOP	13C9_PFNA	SESI-0099	88	6.0134700169990		%	25
650-PYLiq-1	PFAS by Isotope Dilution (36 analytes) (Non-AQ)	PFAS by ID SOP	d-EtFOSA	SESI-0108	29	6.0134700169990		%	25
650-PYLiq-1	PFAS by Isotope Dilution (36 analytes) (Non-AQ)	PFAS by ID SOP	d5-EtFOSAA	SESI-0110	168	6.0134700169990		%	25
650-PYLiq-1	PFAS by Isotope Dilution (36 analytes) (Non-AQ)	PFAS by ID SOP	d9-EtFOSE	SESI-0130	22	6.0134700169990		%	25
650-PYLiq-1	PFAS by Isotope Dilution (36 analytes) (Non-AQ)	PFAS by ID SOP	d-MeFOSA	SESI-0109	50	6.0134700169990		%	25
650-PYLiq-1	PFAS by Isotope Dilution (36 analytes) (Non-AQ)	PFAS by ID SOP	d3-MeFOSAA	SESI-0102	164	6.0134700169990		%	25
650-PYLiq-1	PFAS by Isotope Dilution (36 analytes) (Non-AQ)	PFAS by ID SOP	d7-MeFOSE	SESI-0129	35	6.0134700169990		%	25
650-PYLiq-2	PFAS by Isotope Dilution (36 analytes) (Non-AQ)	PFAS by ID SOP	9-chlorohexadecafluoro-3-oxanone-1-sulfonic acid (9Cl-PF3ONS)	756426-58-1	ND	10000		ng/L	25
650-PYLiq-2	PFAS by Isotope Dilution (36 analytes) (Non-AQ)	PFAS by ID SOP	11-chloroeicosafluoro-3-oxaundecane-1-sulfonic acid (11Cl-PF3OUdS	763051-92-9	ND	10000		ng/L	25
650-PYLiq-2	PFAS by Isotope Dilution (36 analytes) (Non-AQ)	PFAS by ID SOP	1H, 1H, 2H, 2H-perfluorodecane sulfonic acid (8:2 FTS)	39108-34-4	ND	10000		ng/L	25
650-PYLiq-2	PFAS by Isotope Dilution (36 analytes) (Non-AQ)	PFAS by ID SOP	1H, 1H, 2H, 2H-perfluorooctane sulfonic acid (6:2 FTS)	27619-97-2	ND	10000		ng/L	25
650-PYLiq-2	PFAS by Isotope Dilution (36 analytes) (Non-AQ)	PFAS by ID SOP	1H,1H,2H,2H-perfluorododecane sulfonic acid (10:2 FTS)	120226-60-0	ND	10000		ng/L	25
650-PYLiq-2	PFAS by Isotope Dilution (36 analytes) (Non-AQ)	PFAS by ID SOP	1H,1H,2H,2H-perfluorohexane sulfonic acid (4:2 FTS)	757124-72-4	ND	10000		ng/L	25
650-PYLiq-2	PFAS by Isotope Dilution (36 analytes) (Non-AQ)	PFAS by ID SOP	Hexafluoropropylene oxide dimer acid (GenX)	13252-13-6	ND	10000		ng/L	25
650-PYLiq-2	PFAS by Isotope Dilution (36 analytes) (Non-AQ)	PFAS by ID SOP	4,8-dioxa-3H-perfluorononanoic acid (ADONA)	919005-14-4	ND	10000		ng/L	25
650-PYLiq-2	PFAS by Isotope Dilution (36 analytes) (Non-AQ)	PFAS by ID SOP	N-ethylperfluoro-1-octanesulfonamide (EtFOSA)	4151-50-2	ND	10000		ng/L	25
650-PYLiq-2	PFAS by Isotope Dilution (36 analytes) (Non-AQ)	PFAS by ID SOP	N-ethylperfluoro-1-octanesulfonamidoacetic acid (EtFOSAA)	2991-50-6	ND	10000		ng/L	25
650-PYLiq-2	PFAS by Isotope Dilution (36 analytes) (Non-AQ)	PFAS by ID SOP	2-N-ethylperfluoro-1-octanesulfonamido-ethanol (EtFOSE)	1691-99-2	25000	10000		ng/L	25
650-PYLiq-2	PFAS by Isotope Dilution (36 analytes) (Non-AQ)	PFAS by ID SOP	N-methylperfluoro-1-octanesulfonamide (MeFOSA)	31506-32-8	ND	20000		ng/L	25
650-PYLiq-2	PFAS by Isotope Dilution (36 analytes) (Non-AQ)	PFAS by ID SOP	N-methylperfluoro-1-octanesulfonamidoacetic acid (MeFOSAA)	2355-31-9	ND	10000		ng/L	25
650-PYLiq-2	PFAS by Isotope Dilution (36 analytes) (Non-AQ)	PFAS by ID SOP	2-N-methylperfluoro-1-octanesulfonamido-ethanol (MeFOSE)	24448-09-7	79000	10000		ng/L	25
650-PYLiq-2	PFAS by Isotope Dilution (36 analytes) (Non-AQ)	PFAS by ID SOP	Perfluoro-1-butanesulfonic acid (PFBS)	375-73-5	ND	5000		ng/L	25
650-PYLiq-2	PFAS by Isotope Dilution (36 analytes) (Non-AQ)	PFAS by ID SOP	Perfluoro-1-decanesulfonic acid (PFDS)	335-77-3	ND	5000		ng/L	25
650-PYLiq-2	PFAS by Isotope Dilution (36 analytes) (Non-AQ)	PFAS by ID SOP	Perfluoro-1-heptanesulfonic acid (PFHpS)	375-92-8	ND	5000		ng/L	25
650-PYLiq-2	PFAS by Isotope Dilution (36 analytes) (Non-AQ)	PFAS by ID SOP	Perfluoro-1-nonanesulfonic acid (PFNS)	68259-12-1	ND	5000		ng/L	25
650-PYLiq-2	PFAS by Isotope Dilution (36 analytes) (Non-AQ)	PFAS by ID SOP	Perfluoro-1-octanesulfonamide (PFOSA)	754-91-6	ND	5000		ng/L	25
650-PYLiq-2	PFAS by Isotope Dilution (36 analytes) (Non-AQ)	PFAS by ID SOP	Perfluoro-1-pentanesulfonic acid (PFPeS)	2706-91-4	ND	5000		ng/L	25
650-PYLiq-2	PFAS by Isotope Dilution (36 analytes) (Non-AQ)	PFAS by ID SOP	Perfluorododecanesulfonic acid (PFDOS)	79780-39-5	ND	10000		ng/L	25
650-PYLiq-2	PFAS by Isotope Dilution (36 analytes) (Non-AQ)	PFAS by ID SOP	Perfluorohexanesulfonic acid (PFHxS)	355-46-4	ND	5000		ng/L	25
650-PYLiq-2	PFAS by Isotope Dilution (36 analytes) (Non-AQ)	PFAS by ID SOP	Perfluoro-n-butanoic acid (PFBA)	375-22-4	13000	5000		ng/L	25
650-PYLiq-2	PFAS by Isotope Dilution (36 analytes) (Non-AQ)	PFAS by ID SOP	Perfluoro-n-decanoic acid (PFDA)	335-76-2	ND	5000		ng/L	25
650-PYLiq-2	PFAS by Isotope Dilution (36 analytes) (Non-AQ)	PFAS by ID SOP	Perfluoro-n-dodecanoic acid (PFDoA)	307-55-1	ND	5000		ng/L	25
650-PYLiq-2	PFAS by Isotope Dilution (36 analytes) (Non-AQ)	PFAS by ID SOP	Perfluoro-n-heptanoic acid (PFHpA)	375-85-9	ND	5000		ng/L	25
650-PYLiq-2	PFAS by Isotope Dilution (36 analytes) (Non-AQ)	PFAS by ID SOP	Perfluoro-n-hexadecanoic acid (PFHxDA)	67905-19-5	ND	10000		ng/L	25
650-PYLiq-2	PFAS by Isotope Dilution (36 analytes) (Non-AQ)	PFAS by ID SOP	Perfluoro-n-hexanoic acid (PFHxA)	307-24-4	ND	5000		ng/L	25
650-PYLiq-2	PFAS by Isotope Dilution (36 analytes) (Non-AQ)	PFAS by ID SOP	Perfluoro-n-nonanoic acid (PFNA)	375-95-1	ND	5000		ng/L	25
650-PYLiq-2	PFAS by Isotope Dilution (36 analytes) (Non-AQ)	PFAS by ID SOP	Perfluoro-n-octadecanoic acid (PFODA)	16517-11-6	ND	10000		ng/L	25
650-PYLiq-2	PFAS by Isotope Dilution (36 analytes) (Non-AQ)	PFAS by ID SOP	Perfluoro-n-octanoic acid (PFOA)	335-67-1	ND	5000		ng/L	25
650-PYLiq-2	PFAS by Isotope Dilution (36 analytes) (Non-AQ)	PFAS by ID SOP	Perfluoro-n-pentanoic acid (PFPeA)	2706-90-3	ND	5000		ng/L	25
650-PYLiq-2	PFAS by Isotope Dilution (36 analytes) (Non-AQ)	PFAS by ID SOP	Perfluoro-n-tetradecanoic acid (PFTeDA)	376-06-7	ND	5000		ng/L	25
650-PYLiq-2	PFAS by Isotope Dilution (36 analytes) (Non-AQ)	PFAS by ID SOP	Perfluoro-n-tridecanoic acid (PFTrDA)	72629-94-8	ND	5000		ng/L	25
650-PYLiq-2	PFAS by Isotope Dilution (36 analytes) (Non-AQ)	PFAS by ID SOP	Perfluoro-n-undecanoic acid (PFUdA)	2058-94-8	ND	5000		ng/L	25
650-PYLiq-2	PFAS by Isotope Dilution (36 analytes) (Non-AQ)	PFAS by ID SOP	Perfluorooctanesulfonic acid (PFOS)	1763-23-1	ND	5000		ng/L	25
650-PYLiq-2	PFAS by Isotope Dilution (36 analytes) (Non-AQ)	PFAS by ID SOP	13C2_4:2FTS	SESI-0104	346	6.0134700169990		%	25
650-PYLiq-2	PFAS by Isotope Dilution (36 analytes) (Non-AQ)	PFAS by ID SOP	13C2_6:2FTS	SESI-0105	259	6.0134700169990		%	25
650-PYLiq-2	PFAS by Isotope Dilution (36 analytes) (Non-AQ)	PFAS by ID SOP	13C2_8:2FTS	SESI-0106	288	6.0134700169990		%	25
650-PYLiq-2	PFAS by Isotope Dilution (36 analytes) (Non-AQ)	PFAS by ID SOP	13C2_PFDoA	SESI-0118	132	6.0134700169990		%	25
650-PYLiq-2	PFAS by Isotope Dilution (36 analytes) (Non-AQ)	PFAS by ID SOP	13C2_PFHxDA	SESI-0103	178	6.0134700169990		%	25
650-PYLiq-2	PFAS by Isotope Dilution (36 analytes) (Non-AQ)	PFAS by ID SOP	13C2_PFTeDA	SESI-0119	161	6.0134700169990		%	25
650-PYLiq-2	PFAS by Isotope Dilution (36 analytes) (Non-AQ)	PFAS by ID SOP	13C3_PFBS	SESI-0116	91	6.0134700169990		%	25
650-PYLiq-2	PFAS by Isotope Dilution (36 analytes) (Non-AQ)	PFAS by ID SOP	13C3_PFHxS	SESI-0096	78	6.0134700169990		%	25
650-PYLiq-2	PFAS by Isotope Dilution (36 analytes) (Non-AQ)	PFAS by ID SOP	13C3-HFPO-DA	SESI-0121	61	6.0134700169990		%	25
650-PYLiq-2	PFAS by Isotope Dilution (36 analytes) (Non-AQ)	PFAS by ID SOP	13C4_PFBA	SESI-0111	49	6.0134700169990		%	25
650-PYLiq-2	PFAS by Isotope Dilution (36 analytes) (Non-AQ)	PFAS by ID SOP	13C4_PFHpA	SESI-0114	69	6.0134700169990		%	25
650-PYLiq-2	PFAS by Isotope Dilution (36 analytes) (Non-AQ)	PFAS by ID SOP	13C5_PFHxA	SESI-0113	67	6.0134700169990		%	25
650-PYLiq-2	PFAS by Isotope Dilution (36 analytes) (Non-AQ)	PFAS by ID SOP	13C5_PFPeA	SESI-0112	59	6.0134700169990		%	25
650-PYLiq-2	PFAS by Isotope Dilution (36 analytes) (Non-AQ)	PFAS by ID SOP	13C6_PFDA	SESI-0115	95	6.0134700169990		%	25
650-PYLiq-2	PFAS by Isotope Dilution (36 analytes) (Non-AQ)	PFAS by ID SOP	13C7_PFUdA	SESI-0117	118	6.0134700169990		%	25
650-PYLiq-2	PFAS by Isotope Dilution (36 analytes) (Non-AQ)	PFAS by ID SOP	13C8_PFOA	SESI-0097	74	6.0134700169990		%	25
650-PYLiq-2	PFAS by Isotope Dilution (36 analytes) (Non-AQ)	PFAS by ID SOP	13C8_PFOS	SESI-0098	87	6.0134700169990		%	25
650-PYLiq-2	PFAS by Isotope Dilution (36 analytes) (Non-AQ)	PFAS by ID SOP	13C8_PFOSA	SESI-0107	75	6.0134700169990		%	25
650-PYLiq-2	PFAS by Isotope Dilution (36 analytes) (Non-AQ)	PFAS by ID SOP	13C9_PFNA	SESI-0099	91	6.0134700169990		%	25
650-PYLiq-2	PFAS by Isotope Dilution (36 analytes) (Non-AQ)	PFAS by ID SOP	d-EtFOSA	SESI-0108	38	6.0134700169990		%	25
650-PYLiq-2	PFAS by Isotope Dilution (36 analytes) (Non-AQ)	PFAS by ID SOP	d5-EtFOSAA	SESI-0110	173	6.0134700169990		%	25
650-PYLiq-2	PFAS by Isotope Dilution (36 analytes) (Non-AQ)	PFAS by ID SOP	d9-EtFOSE	SESI-0130	27	6.0134700169990		%	25
650-PYLiq-2	PFAS by Isotope Dilution (36 analytes) (Non-AQ)	PFAS by ID SOP	d-MeFOSA	SESI-0109	50	6.0134700169990		%	25
650-PYLiq-2	PFAS by Isotope Dilution (36 analytes) (Non-AQ)	PFAS by ID SOP	d3-MeFOSAA	SESI-0102	150	6.0134700169990		%	25
650-PYLiq-2	PFAS by Isotope Dilution (36 analytes) (Non-AQ)	PFAS by ID SOP	d7-MeFOSE	SESI-0129	38	6.0134700169990		%	25
650-PYLiq-3	PFAS by Isotope Dilution (36 analytes) (Non-AQ)	PFAS by ID SOP	9-chlorohexadecafluoro-3-oxanone-1-sulfonic acid (9Cl-PF3ONS)	756426-58-1	ND	10000		ng/L	25
650-PYLiq-3	PFAS by Isotope Dilution (36 analytes) (Non-AQ)	PFAS by ID SOP	11-chloroeicosafluoro-3-oxaundecane-1-sulfonic acid (11Cl-PF3OUdS	763051-92-9	ND	10000		ng/L	25
650-PYLiq-3	PFAS by Isotope Dilution (36 analytes) (Non-AQ)	PFAS by ID SOP	1H, 1H, 2H, 2H-perfluorodecane sulfonic acid (8:2 FTS)	39108-34-4	ND	10000		ng/L	25
650-PYLiq-3	PFAS by Isotope Dilution (36 analytes) (Non-AQ)	PFAS by ID SOP	1H, 1H, 2H, 2H-perfluorooctane sulfonic acid (6:2 FTS)	27619-97-2	ND	10000		ng/L	25
650-PYLiq-3	PFAS by Isotope Dilution (36 analytes) (Non-AQ)	PFAS by ID SOP	1H,1H,2H,2H-perfluorododecane sulfonic acid (10:2 FTS)	120226-60-0	ND	10000		ng/L	25
650-PYLiq-3	PFAS by Isotope Dilution (36 analytes) (Non-AQ)	PFAS by ID SOP	1H,1H,2H,2H-perfluorohexane sulfonic acid (4:2 FTS)	757124-72-4	ND	10000		ng/L	25
650-PYLiq-3	PFAS by Isotope Dilution (36 analytes) (Non-AQ)	PFAS by ID SOP	Hexafluoropropylene oxide dimer acid (GenX)	13252-13-6	ND	10000		ng/L	25
650-PYLiq-3	PFAS by Isotope Dilution (36 analytes) (Non-AQ)	PFAS by ID SOP	4,8-dioxa-3H-perfluorononanoic acid (ADONA)	919005-14-4	ND	10000		ng/L	25
650-PYLiq-3	PFAS by Isotope Dilution (36 analytes) (Non-AQ)	PFAS by ID SOP	N-ethylperfluoro-1-octanesulfonamide (EtFOSA)	4151-50-2	ND	10000		ng/L	25
650-PYLiq-3	PFAS by Isotope Dilution (36 analytes) (Non-AQ)	PFAS by ID SOP	N-ethylperfluoro-1-octanesulfonamidoacetic acid (EtFOSAA)	2991-50-6	ND	10000		ng/L	25
650-PYLiq-3	PFAS by Isotope Dilution (36 analytes) (Non-AQ)	PFAS by ID SOP	2-N-ethylperfluoro-1-octanesulfonamido-ethanol (EtFOSE)	1691-99-2	ND	10000		ng/L	25
650-PYLiq-3	PFAS by Isotope Dilution (36 analytes) (Non-AQ)	PFAS by ID SOP	N-methylperfluoro-1-octanesulfonamide (MeFOSA)	31506-32-8	ND	20000		ng/L	25
650-PYLiq-3	PFAS by Isotope Dilution (36 analytes) (Non-AQ)	PFAS by ID SOP	N-methylperfluoro-1-octanesulfonamidoacetic acid (MeFOSAA)	2355-31-9	ND	10000		ng/L	25
650-PYLiq-3	PFAS by Isotope Dilution (36 analytes) (Non-AQ)	PFAS by ID SOP	2-N-methylperfluoro-1-octanesulfonamido-ethanol (MeFOSE)	24448-09-7	54000	10000		ng/L	25
650-PYLiq-3	PFAS by Isotope Dilution (36 analytes) (Non-AQ)	PFAS by ID SOP	Perfluoro-1-butanesulfonic acid (PFBS)	375-73-5	ND	5000		ng/L	25
650-PYLiq-3	PFAS by Isotope Dilution (36 analytes) (Non-AQ)	PFAS by ID SOP	Perfluoro-1-decanesulfonic acid (PFDS)	335-77-3	ND	5000		ng/L	25
650-PYLiq-3	PFAS by Isotope Dilution (36 analytes) (Non-AQ)	PFAS by ID SOP	Perfluoro-1-heptanesulfonic acid (PFHpS)	375-92-8	ND	5000		ng/L	25
650-PYLiq-3	PFAS by Isotope Dilution (36 analytes) (Non-AQ)	PFAS by ID SOP	Perfluoro-1-nonanesulfonic acid (PFNS)	68259-12-1	ND	5000		ng/L	25
650-PYLiq-3	PFAS by Isotope Dilution (36 analytes) (Non-AQ)	PFAS by ID SOP	Perfluoro-1-octanesulfonamide (PFOSA)	754-91-6	ND	5000		ng/L	25
650-PYLiq-3	PFAS by Isotope Dilution (36 analytes) (Non-AQ)	PFAS by ID SOP	Perfluoro-1-pentanesulfonic acid (PFPeS)	2706-91-4	ND	5000		ng/L	25
650-PYLiq-3	PFAS by Isotope Dilution (36 analytes) (Non-AQ)	PFAS by ID SOP	Perfluorododecanesulfonic acid (PFDOS)	79780-39-5	ND	10000		ng/L	25
650-PYLiq-3	PFAS by Isotope Dilution (36 analytes) (Non-AQ)	PFAS by ID SOP	Perfluorohexanesulfonic acid (PFHxS)	355-46-4	ND	5000		ng/L	25
650-PYLiq-3	PFAS by Isotope Dilution (36 analytes) (Non-AQ)	PFAS by ID SOP	Perfluoro-n-butanoic acid (PFBA)	375-22-4	10000	5000		ng/L	25
650-PYLiq-3	PFAS by Isotope Dilution (36 analytes) (Non-AQ)	PFAS by ID SOP	Perfluoro-n-decanoic acid (PFDA)	335-76-2	ND	5000		ng/L	25
650-PYLiq-3	PFAS by Isotope Dilution (36 analytes) (Non-AQ)	PFAS by ID SOP	Perfluoro-n-dodecanoic acid (PFDoA)	307-55-1	ND	5000		ng/L	25
650-PYLiq-3	PFAS by Isotope Dilution (36 analytes) (Non-AQ)	PFAS by ID SOP	Perfluoro-n-heptanoic acid (PFHpA)	375-85-9	ND	5000		ng/L	25
650-PYLiq-3	PFAS by Isotope Dilution (36 analytes) (Non-AQ)	PFAS by ID SOP	Perfluoro-n-hexadecanoic acid (PFHxDA)	67905-19-5	ND	10000		ng/L	25
650-PYLiq-3	PFAS by Isotope Dilution (36 analytes) (Non-AQ)	PFAS by ID SOP	Perfluoro-n-hexanoic acid (PFHxA)	307-24-4	ND	5000		ng/L	25
650-PYLiq-3	PFAS by Isotope Dilution (36 analytes) (Non-AQ)	PFAS by ID SOP	Perfluoro-n-nonanoic acid (PFNA)	375-95-1	ND	5000		ng/L	25
650-PYLiq-3	PFAS by Isotope Dilution (36 analytes) (Non-AQ)	PFAS by ID SOP	Perfluoro-n-octadecanoic acid (PFODA)	16517-11-6	ND	10000		ng/L	25
650-PYLiq-3	PFAS by Isotope Dilution (36 analytes) (Non-AQ)	PFAS by ID SOP	Perfluoro-n-octanoic acid (PFOA)	335-67-1	ND	5000		ng/L	25
650-PYLiq-3	PFAS by Isotope Dilution (36 analytes) (Non-AQ)	PFAS by ID SOP	Perfluoro-n-pentanoic acid (PFPeA)	2706-90-3	ND	5000		ng/L	25
650-PYLiq-3	PFAS by Isotope Dilution (36 analytes) (Non-AQ)	PFAS by ID SOP	Perfluoro-n-tetradecanoic acid (PFTeDA)	376-06-7	ND	5000		ng/L	25
650-PYLiq-3	PFAS by Isotope Dilution (36 analytes) (Non-AQ)	PFAS by ID SOP	Perfluoro-n-tridecanoic acid (PFTrDA)	72629-94-8	ND	5000		ng/L	25
650-PYLiq-3	PFAS by Isotope Dilution (36 analytes) (Non-AQ)	PFAS by ID SOP	Perfluoro-n-undecanoic acid (PFUdA)	2058-94-8	ND	5000		ng/L	25
650-PYLiq-3	PFAS by Isotope Dilution (36 analytes) (Non-AQ)	PFAS by ID SOP	Perfluorooctanesulfonic acid (PFOS)	1763-23-1	ND	5000		ng/L	25
650-PYLiq-3	PFAS by Isotope Dilution (36 analytes) (Non-AQ)	PFAS by ID SOP	13C2_4:2FTS	SESI-0104	358	0.00-0.00		%	25
650-PYLiq-3	PFAS by Isotope Dilution (36 analytes) (Non-AQ)	PFAS by ID SOP	13C2_6:2FTS	SESI-0105	276	0.00-0.00		%	25
650-PYLiq-3	PFAS by Isotope Dilution (36 analytes) (Non-AQ)	PFAS by ID SOP	13C2_8:2FTS	SESI-0106	284	0.00-0.00		%	25
650-PYLiq-3	PFAS by Isotope Dilution (36 analytes) (Non-AQ)	PFAS by ID SOP	13C2_PFDoA	SESI-0118	140	0.00-0.00		%	25
650-PYLiq-3	PFAS by Isotope Dilution (36 analytes) (Non-AQ)	PFAS by ID SOP	13C2_PFHxDA	SESI-0103	184	0.00-0.00		%	25
650-PYLiq-3	PFAS by Isotope Dilution (36 analytes) (Non-AQ)	PFAS by ID SOP	13C2_PFTeDA	SESI-0119	165	0.00-0.00		%	25
650-PYLiq-3	PFAS by Isotope Dilution (36 analytes) (Non-AQ)	PFAS by ID SOP	13C3_PFBS	SESI-0116	89	0.00-0.00		%	25
650-PYLiq-3	PFAS by Isotope Dilution (36 analytes) (Non-AQ)	PFAS by ID SOP	13C3_PFHxS	SESI-0096	87	0.00-0.00		%	25
650-PYLiq-3	PFAS by Isotope Dilution (36 analytes) (Non-AQ)	PFAS by ID SOP	13C3-HFPO-DA	SESI-0121	66	0.00-0.00		%	25
650-PYLiq-3	PFAS by Isotope Dilution (36 analytes) (Non-AQ)	PFAS by ID SOP	13C4_PFBA	SESI-0111	51	0.00-0.00		%	25
650-PYLiq-3	PFAS by Isotope Dilution (36 analytes) (Non-AQ)	PFAS by ID SOP	13C4_PFHpA	SESI-0114	70	0.00-0.00		%	25
650-PYLiq-3	PFAS by Isotope Dilution (36 analytes) (Non-AQ)	PFAS by ID SOP	13C5_PFHxA	SESI-0113	72	0.00-0.00		%	25
650-PYLiq-3	PFAS by Isotope Dilution (36 analytes) (Non-AQ)	PFAS by ID SOP	13C5_PFPeA	SESI-0112	61	0.00-0.00		%	25
650-PYLiq-3	PFAS by Isotope Dilution (36 analytes) (Non-AQ)	PFAS by ID SOP	13C6_PFDA	SESI-0115	96	0.00-0.00		%	25
650-PYLiq-3	PFAS by Isotope Dilution (36 analytes) (Non-AQ)	PFAS by ID SOP	13C7_PFUdA	SESI-0117	122	0.00-0.00		%	25
650-PYLiq-3	PFAS by Isotope Dilution (36 analytes) (Non-AQ)	PFAS by ID SOP	13C8_PFOA	SESI-0097	80	0.00-0.00		%	25
650-PYLiq-3	PFAS by Isotope Dilution (36 analytes) (Non-AQ)	PFAS by ID SOP	13C8_PFOS	SESI-0098	94	0.00-0.00		%	25
650-PYLiq-3	PFAS by Isotope Dilution (36 analytes) (Non-AQ)	PFAS by ID SOP	13C8_PFOSA	SESI-0107	76	0.00-0.00		%	25
650-PYLiq-3	PFAS by Isotope Dilution (36 analytes) (Non-AQ)	PFAS by ID SOP	13C9_PFNA	SESI-0099	93	0.00-0.00		%	25
650-PYLiq-3	PFAS by Isotope Dilution (36 analytes) (Non-AQ)	PFAS by ID SOP	d-EtFOSA	SESI-0108	42	0.00-0.00		%	25
650-PYLiq-3	PFAS by Isotope Dilution (36 analytes) (Non-AQ)	PFAS by ID SOP	d5-EtFOSAA	SESI-0110	175	0.00-0.00		%	25
650-PYLiq-3	PFAS by Isotope Dilution (36 analytes) (Non-AQ)	PFAS by ID SOP	d9-EtFOSE	SESI-0130	30	0.00-0.00		%	25
650-PYLiq-3	PFAS by Isotope Dilution (36 analytes) (Non-AQ)	PFAS by ID SOP	d-MeFOSA	SESI-0109	53	0.00-0.00		%	25
650-PYLiq-3	PFAS by Isotope Dilution (36 analytes) (Non-AQ)	PFAS by ID SOP	d3-MeFOSAA	SESI-0102	159	0.00-0.00		%	25
650-PYLiq-3	PFAS by Isotope Dilution (36 analytes) (Non-AQ)	PFAS by ID SOP	d7-MeFOSE	SESI-0129	42	0.00-0.00		%	25
